# Supplementary material for: Prioritizing non-coding regions based on human genomic constraint and sequence context with deep learning
Source: PubMed Central journal article supplement (PMC7940646; doi:10.1038/s41467-021-21790-4), 2021-03-08
Supplement: 41467_2021_21790_MOESM1_ESM.pdf [file 41467_2021_21790_MOESM1_ESM.pdf]

## Supplementary Information

### Window length Sensitivity analysis

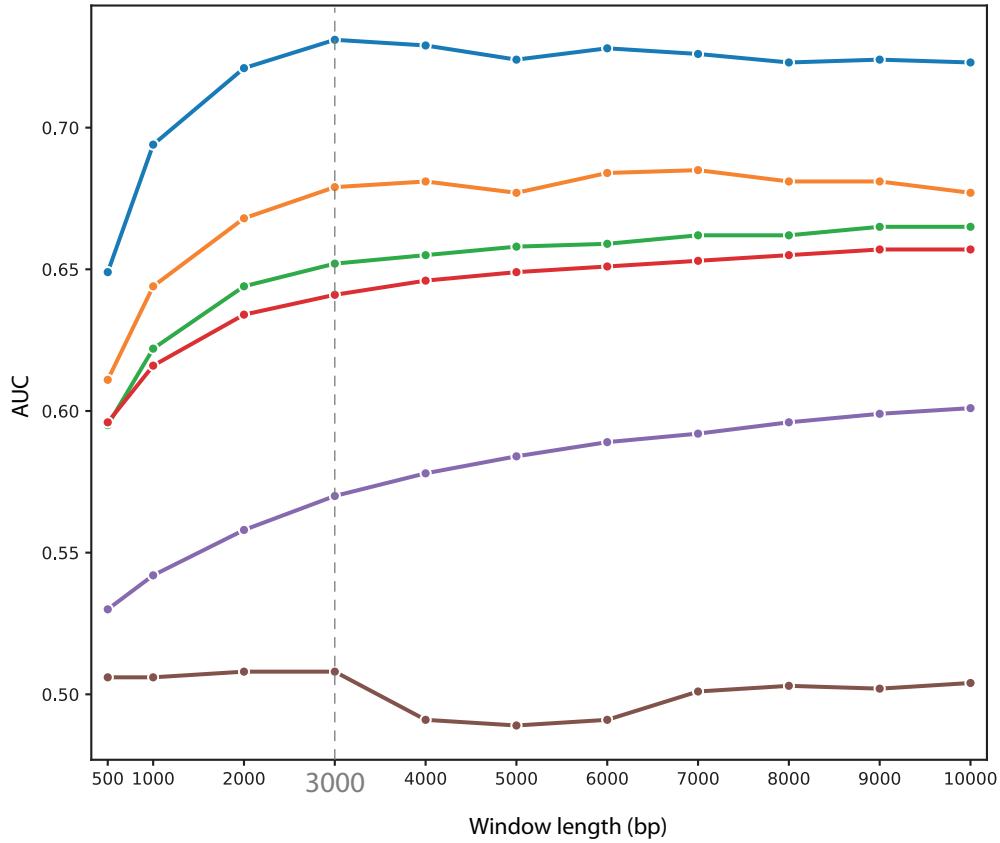

a

### MAF Sensitivity analysis

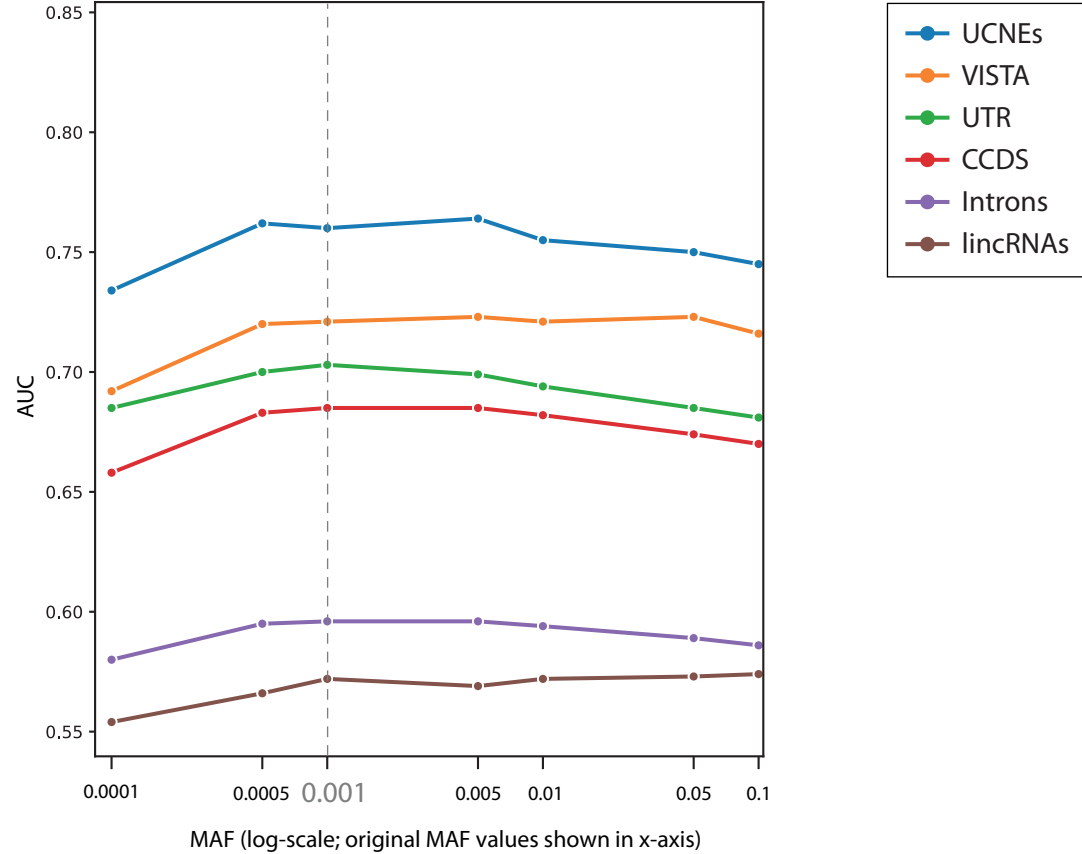

b

**Supplementary Figure 1.** Sensitivity analysis for optimal selection of a) window length and b) Minor Allele Frequency (MAF) threshold for gwRVIS calculation. The output examined in this sensitivity analysis is the segregation of non-intergenic genomic classes compared to the intergenic class. This is quantified by the AUC score of a Logistic Regression classifier, trying to distinguish sets of windows from two different genomic classes using 10-fold Cross-Validation. The aim of the analysis is to achieve the best possible segregation with the smallest possible window length. A 3kb window length has been selected in this case and then a further MAF sensitivity analysis has been performed for 8 different values: 0.0001, 0.0005, 0.001, 0.005, 0.01, 0.05, 0.1, 0.5. We have selected MAF=0.001 as our default value, as it achieves the peak of AUC performance in the majority of genomic classes (along with 0.005 and 0.01).

**a**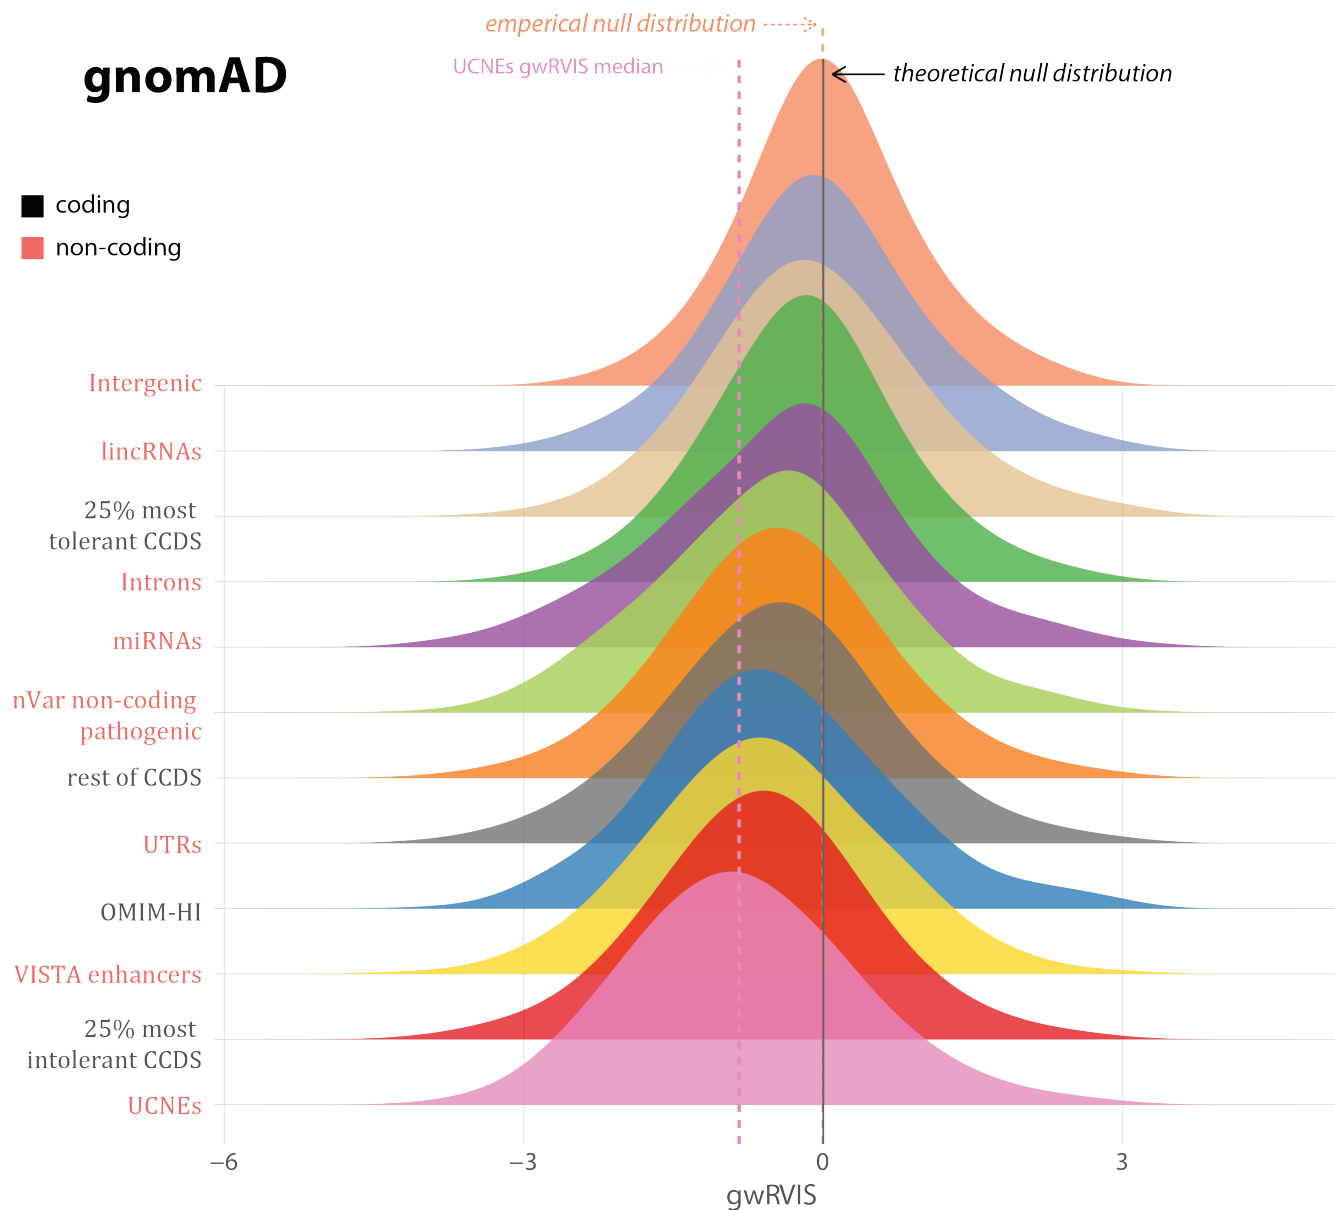**b**

Mean ROC curves for gwrVIS predictive power (UCNEs vs Intergenic regions) with 5-fold cross-validation

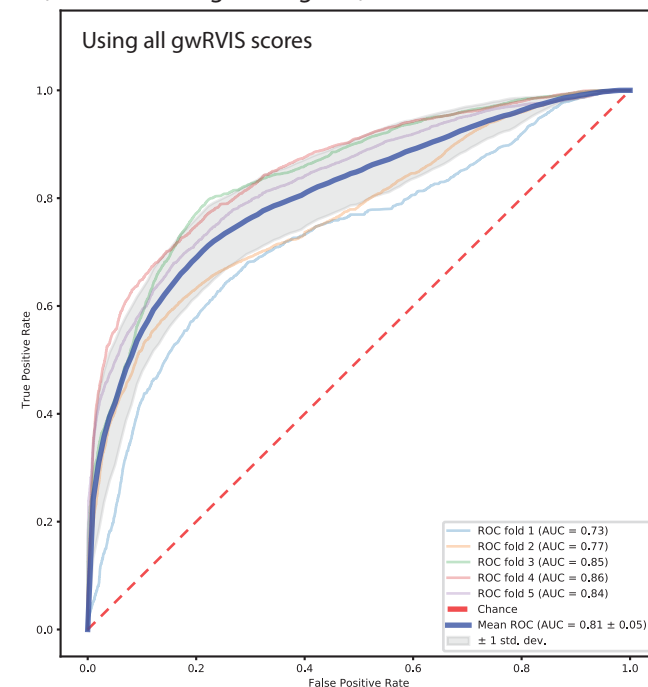**b**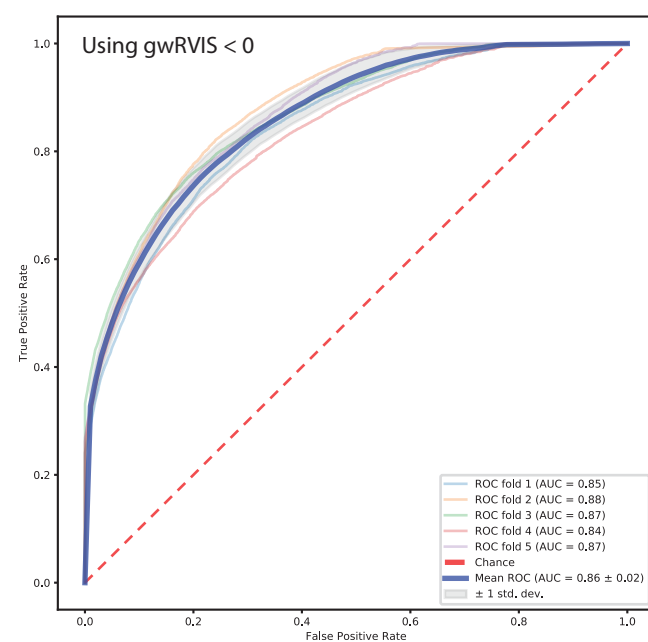

**Supplementary Figure 2.** Fine-grain genome-wide performance of gwrVIS. **a.** Distribution of gwrVIS scores across 12 genomic classes, in descending order of intolerance to variation: intergenic regions, lincRNAs, 25% most tolerant CCDS (based on RVIS), introns, miRNAs, ClinVar non-coding pathogenic, rest of CCDS (25-75 percentile based on RVIS), UTRs, OMIM Haploinsufficient, VISTA enhancers, 25% most intolerant CCDS (based on RVIS) and UCNEs (Ultra Conserved Non-Coding Elements).

**b.** 5-fold cross-validation for classification of UCNE-vs-Intergenic positions with gwrVIS, when including all gwrVIS scores. **c.** 5-fold cross-validation for classification of UCNE-vs-Intergenic positions with gwrVIS, when including only genomic regions with negative selection (gwrVIS < 0). A logistic regression model has been employed in both **(b)** and **(c)**.

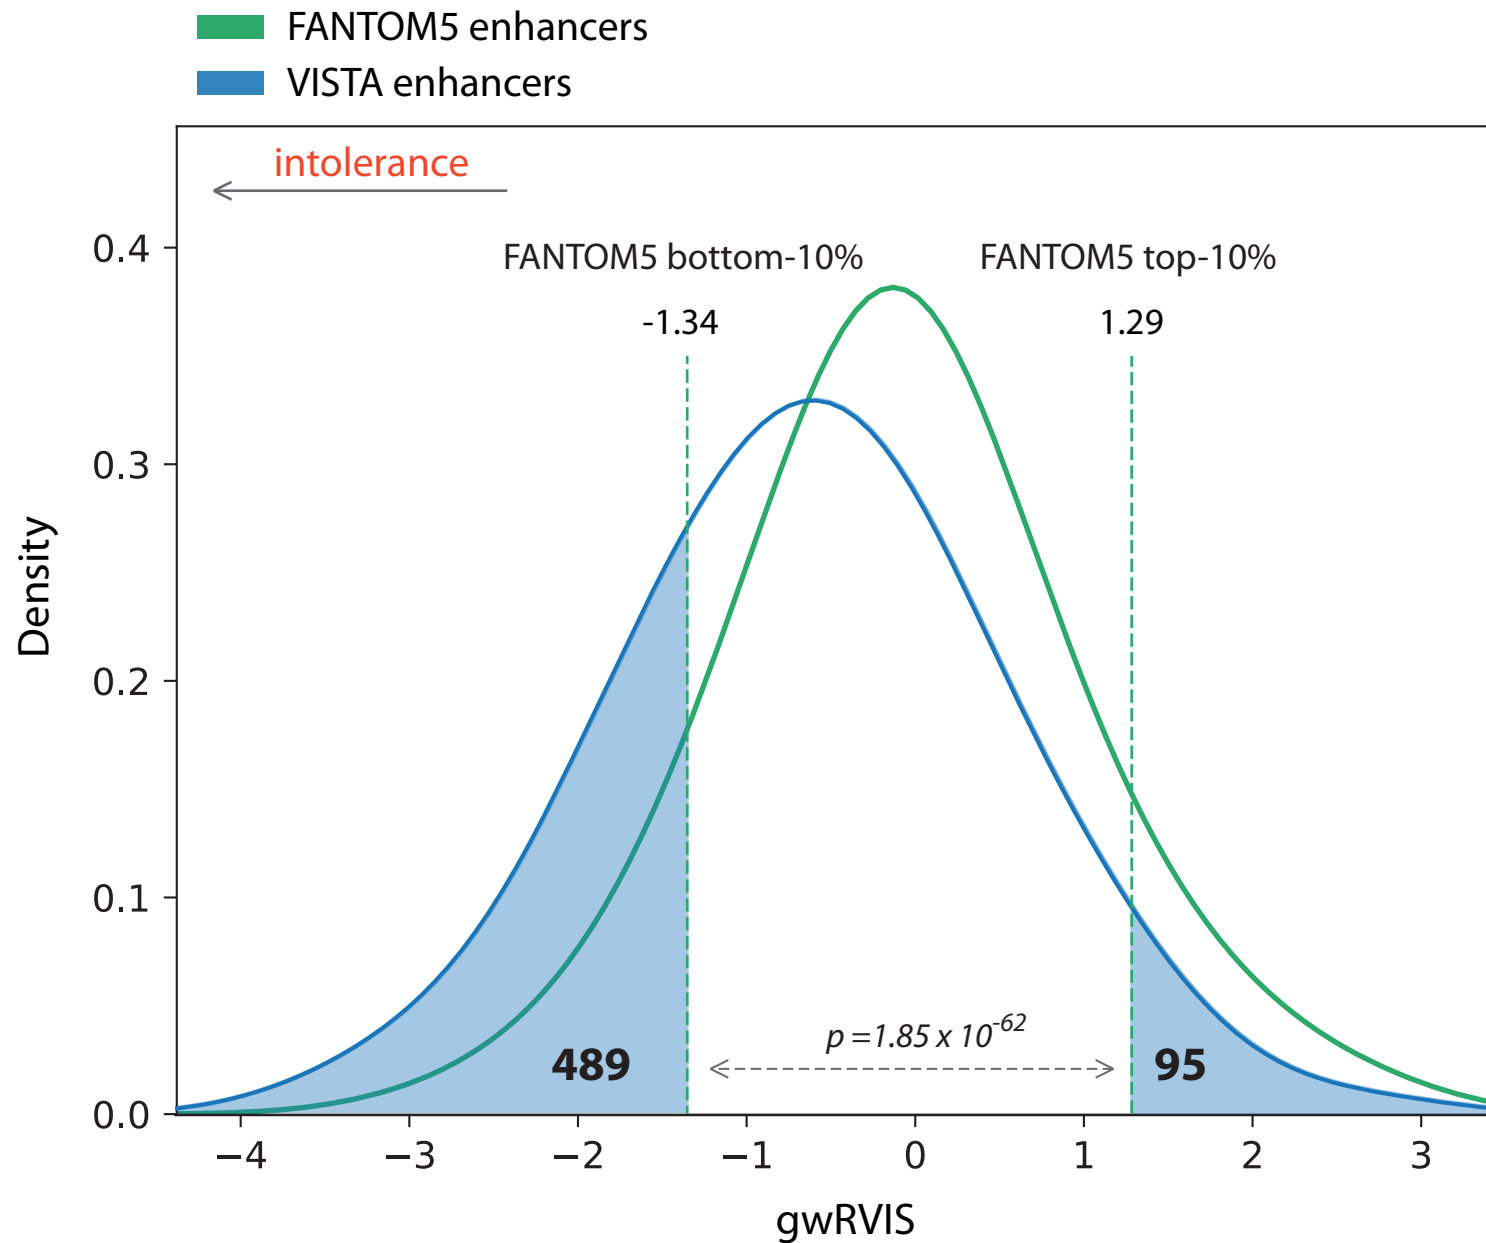

**Supplementary Figure 3.** Distribution of VISTA enhancers across all FANTOM5 enhancers: the 10% most intolerant FANTOM5 enhancers were significantly enriched for VISTA enhancers compared to the 10% most tolerant ones (489 vs 95 windows; 5.15-fold increase, two-sided Fisher's exact test  $p = 1.85 \times 10^{-62}$ ).

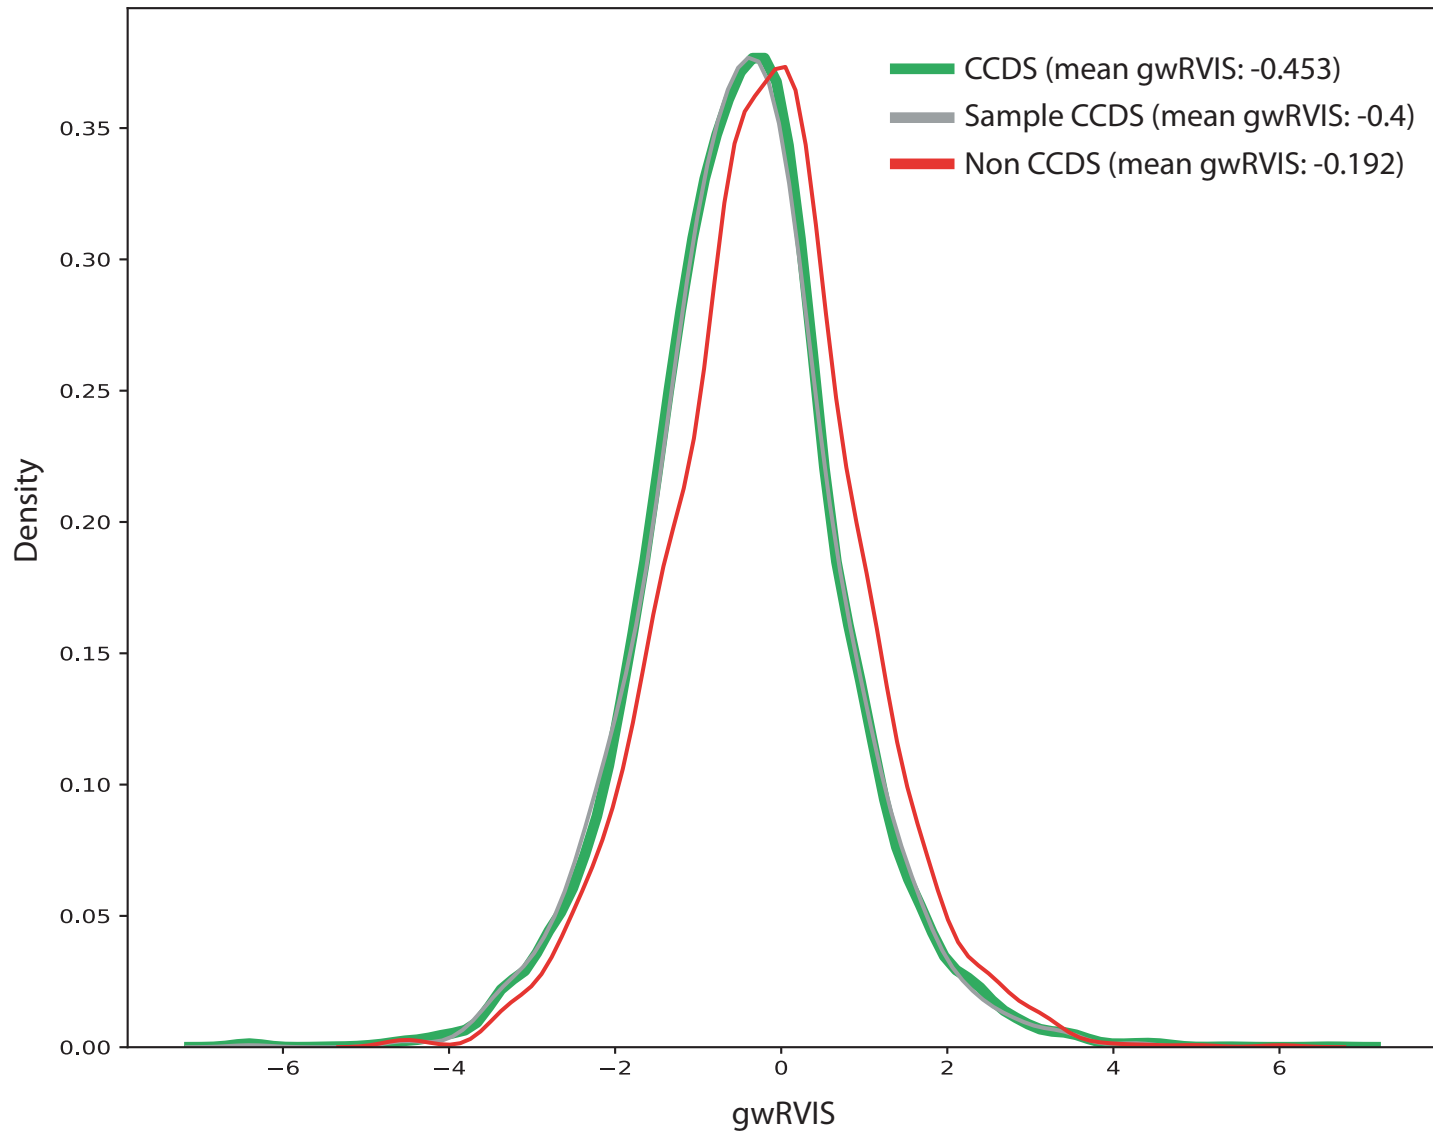

**Supplementary Figure 4.** gwRVIS benchmarking using a set of 996 CCDS and 989 non-CCDS regions from the Orion paper (Gussow et al., 2017). The segregation between CCDS and non-CCDS regions achieved by gwRVIS is significantly greater than the one achieved by Orion:  $p=8.1 \times 10^{-23}$  for gwRVIS while  $p=0.001$  for Orion (two-sided Mann-Whitney U test). A similar significant segregation is also achieved when comparing all non-CCDS regions against a matched sample of CCDS regions of equal size:  $p\text{-value} = 8.44 \times 10^{-15}$  (two-sided Mann-Whitney U test).

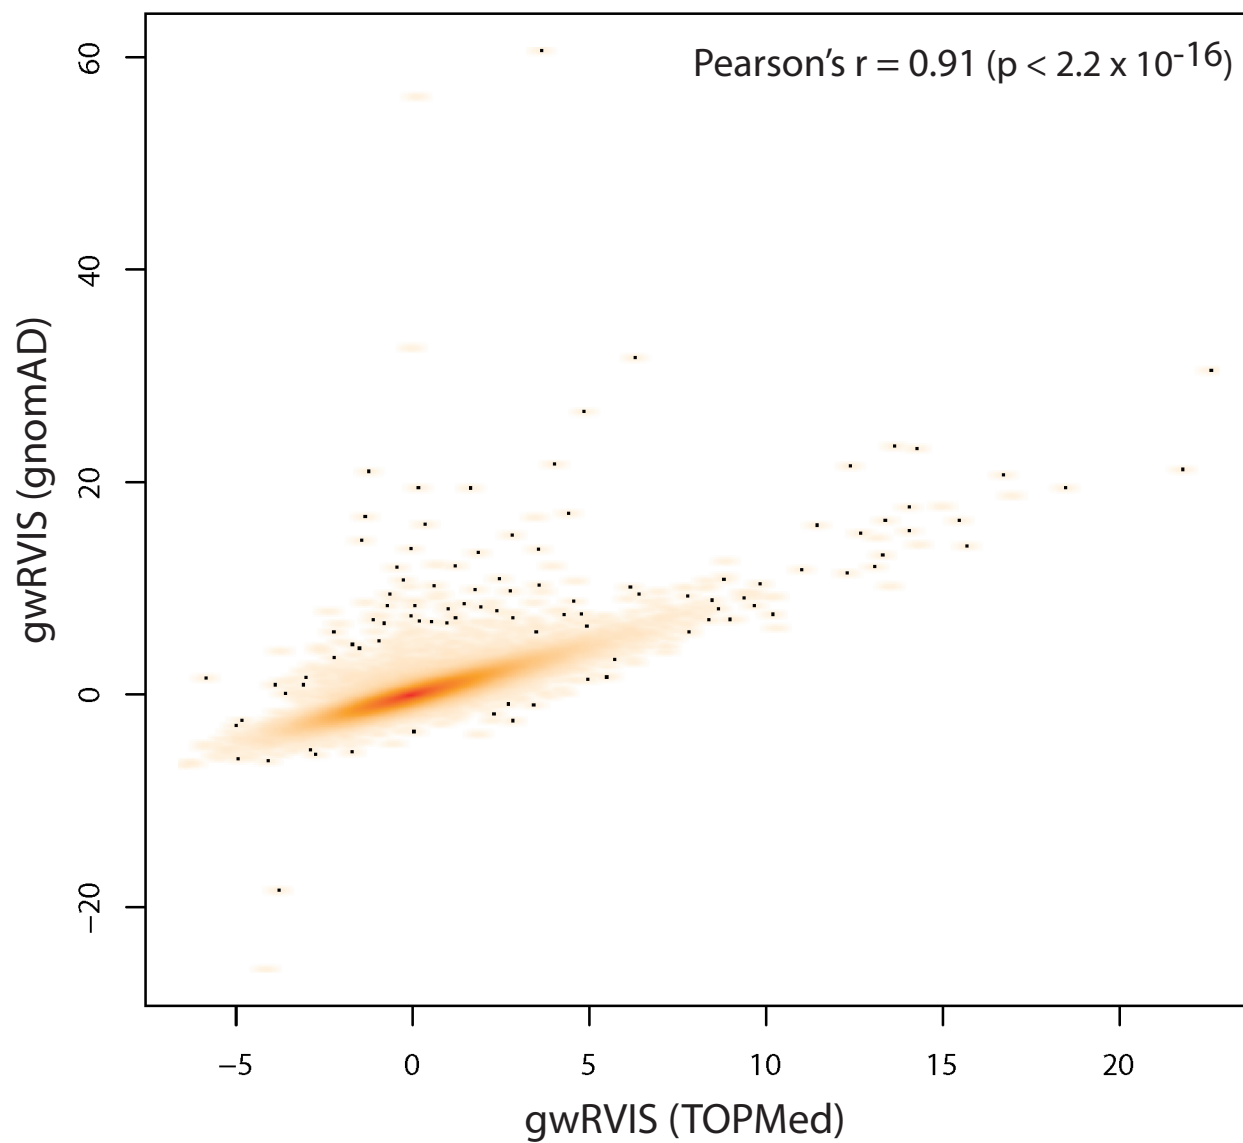

**Supplementary Figure 5.** gwRVIS consistency on two different WGS datasets: Correlation plot between TOPMed- and gnomAD-derived gwRVIS values; Pearson's correlation coefficient:  $r = 0.91$ ,  $p < 2.2 \times 10^{-16}$ .

Genome-wide scores distribution between pathogenic and benign variant sets  
(Ordered from left to right in decreasing order of AUC performance with 5-fold cross-validation)

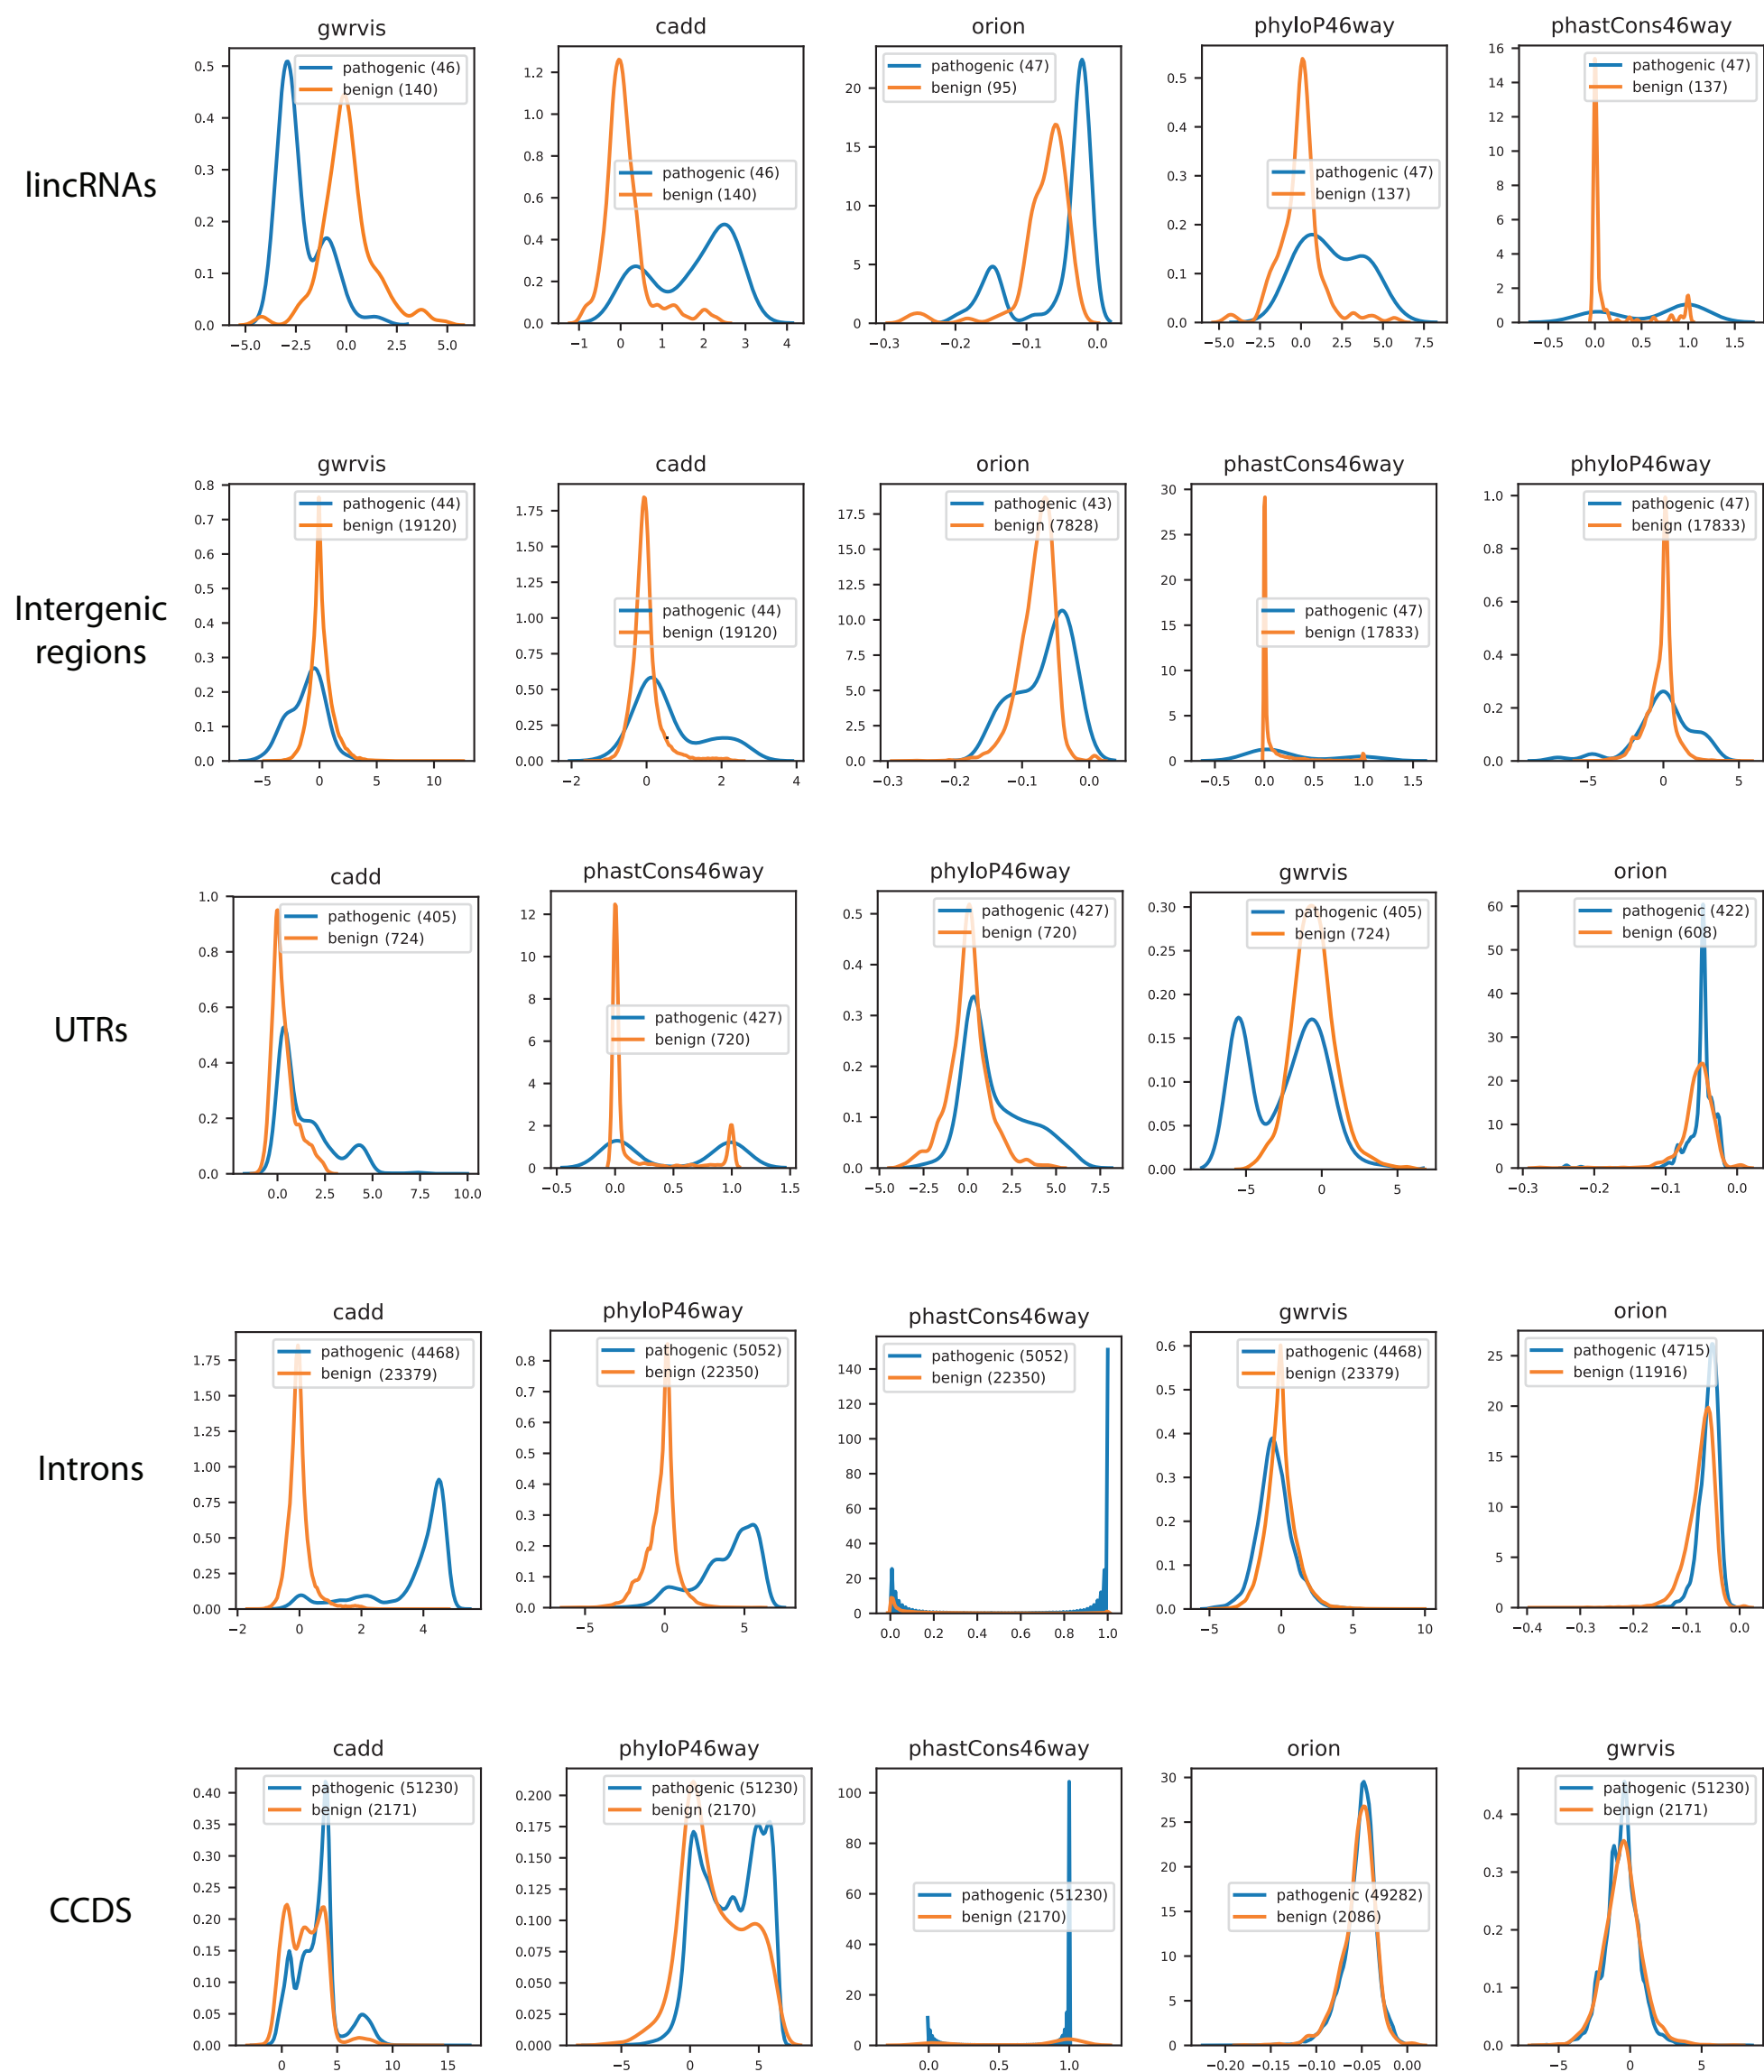

**Supplementary Figure 6.** Distribution of genome-wide scores between pathogenic and benign sets of variant loci across five different genomic classes: lincRNAs, intergenic, UTRs, Introns and CCDS. Pathogenic variants are derived from ClinVar while benign variants have been extracted from denovo-db, as those annotated with a “control” primary phenotype. For each genomic class, scores are sorted from left to right in decreasing order of AUC performance achieved by a 5-fold Logistic Regression classifier. For this classification task, class imbalance has been resolved by sampling a random sample from the benign set matching the respective pathogenic set in size.

Variant classification in CCDS

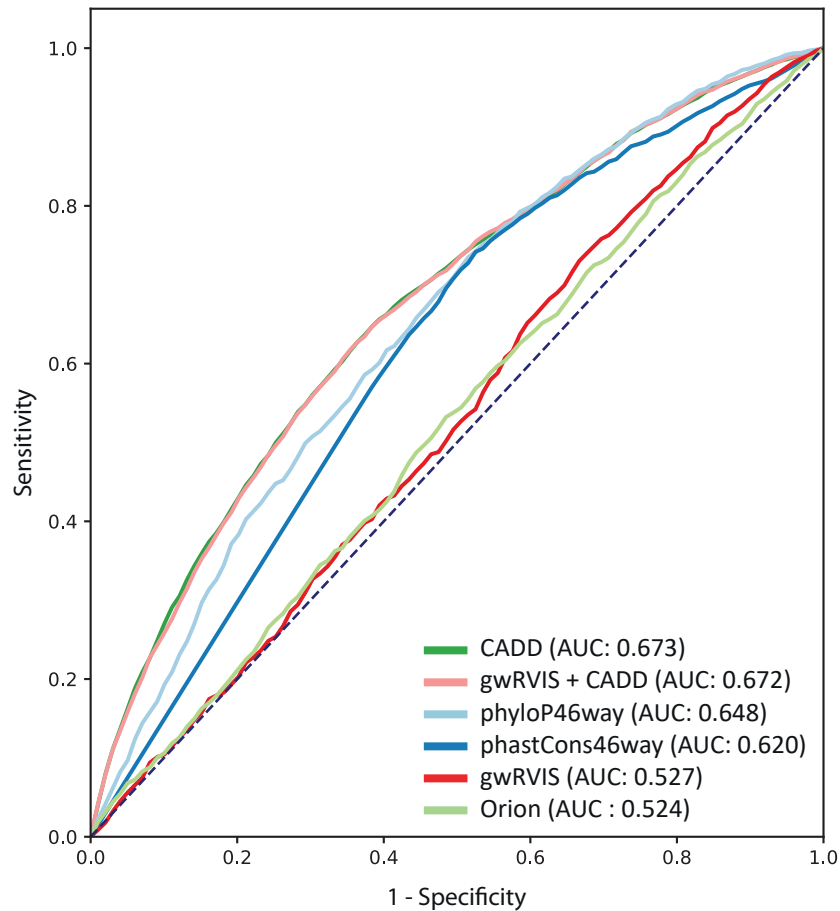

Variant classification in Introns

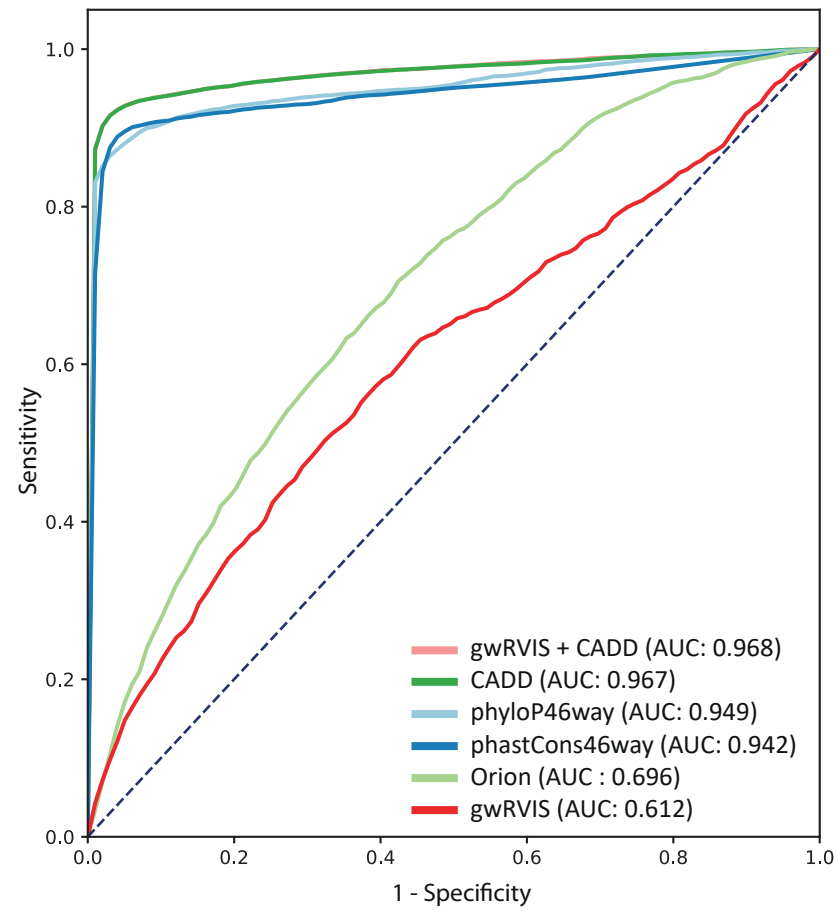

**Supplementary Figure 7.** Benchmarking of genome-wide scores for pathogenic-vs-benign variant classification. Mean ROC curves from 5-fold Cross-Validation prediction with Logistic Regression are shown across two genomic classes: a) CCDS and b) Introns.

# JARVIS training with Deep Learning on ClinVar non-coding pathogenic variants (intergenic regions, UTRs, lincRNAs, UCNEs and VISTA enhancers)

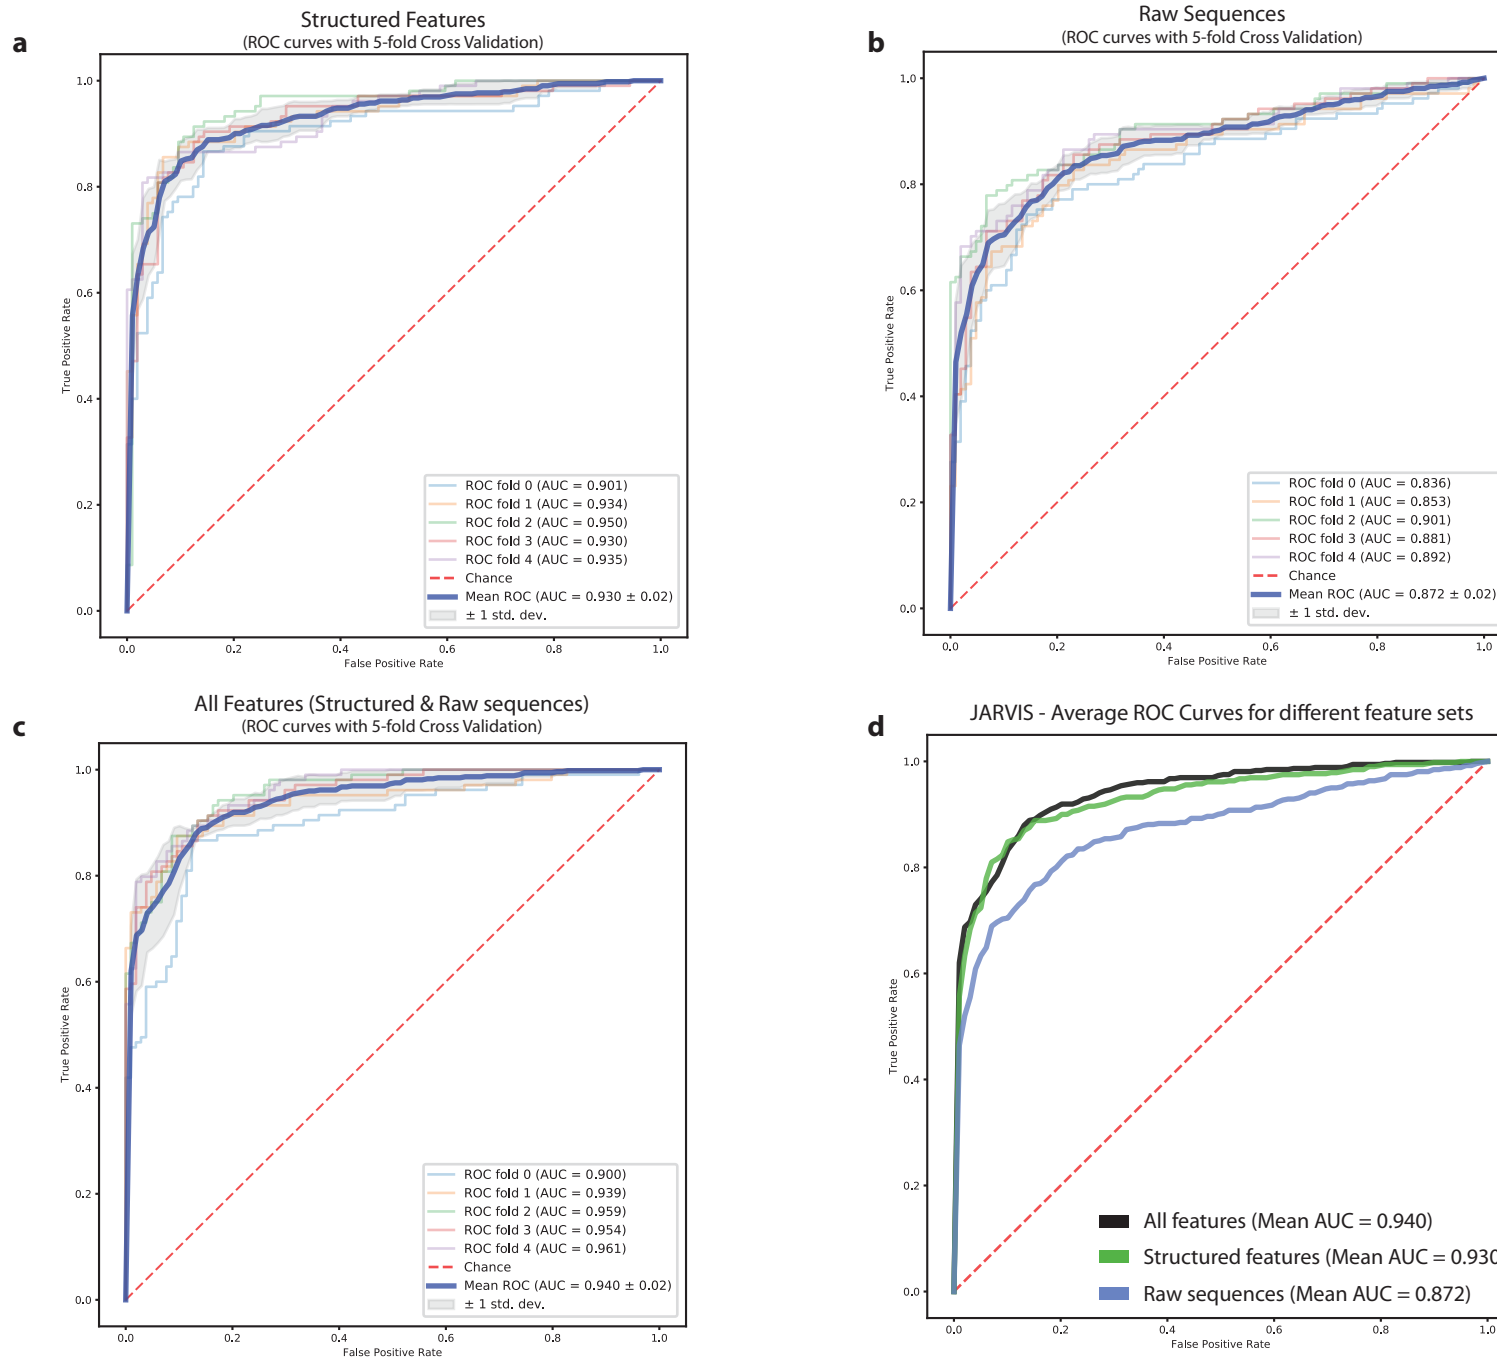

**Supplementary Figure 8.** JARVIS training with Deep Learning using different feature sets. ROC Curves with 5-fold Cross-Validation using: **a)** Structured features, **b)** Raw Sequences, and **c)** All features (Structured and Raw sequences). **d)** Mean ROC curves from JARVIS training with deep neural networks using the three different feature set combinations. Training has been performed using all 521 pathogenic variants annotated in ClinVar for the full non-coding model (i.e. encompassing intergenic regions, UTRs, lincRNAs, UCNEs, or Vista enhancers) and a negative set of benign variants of equal size extracted randomly from a set of “control” variants derived from denovo-db. Mean ROC in all plots refers to the ROC of the mean of model predictions from each cross-validation split.



Mean ROC Curves - ClinVar non-coding pathogenic variant classification  
with or without information for TSS-distance

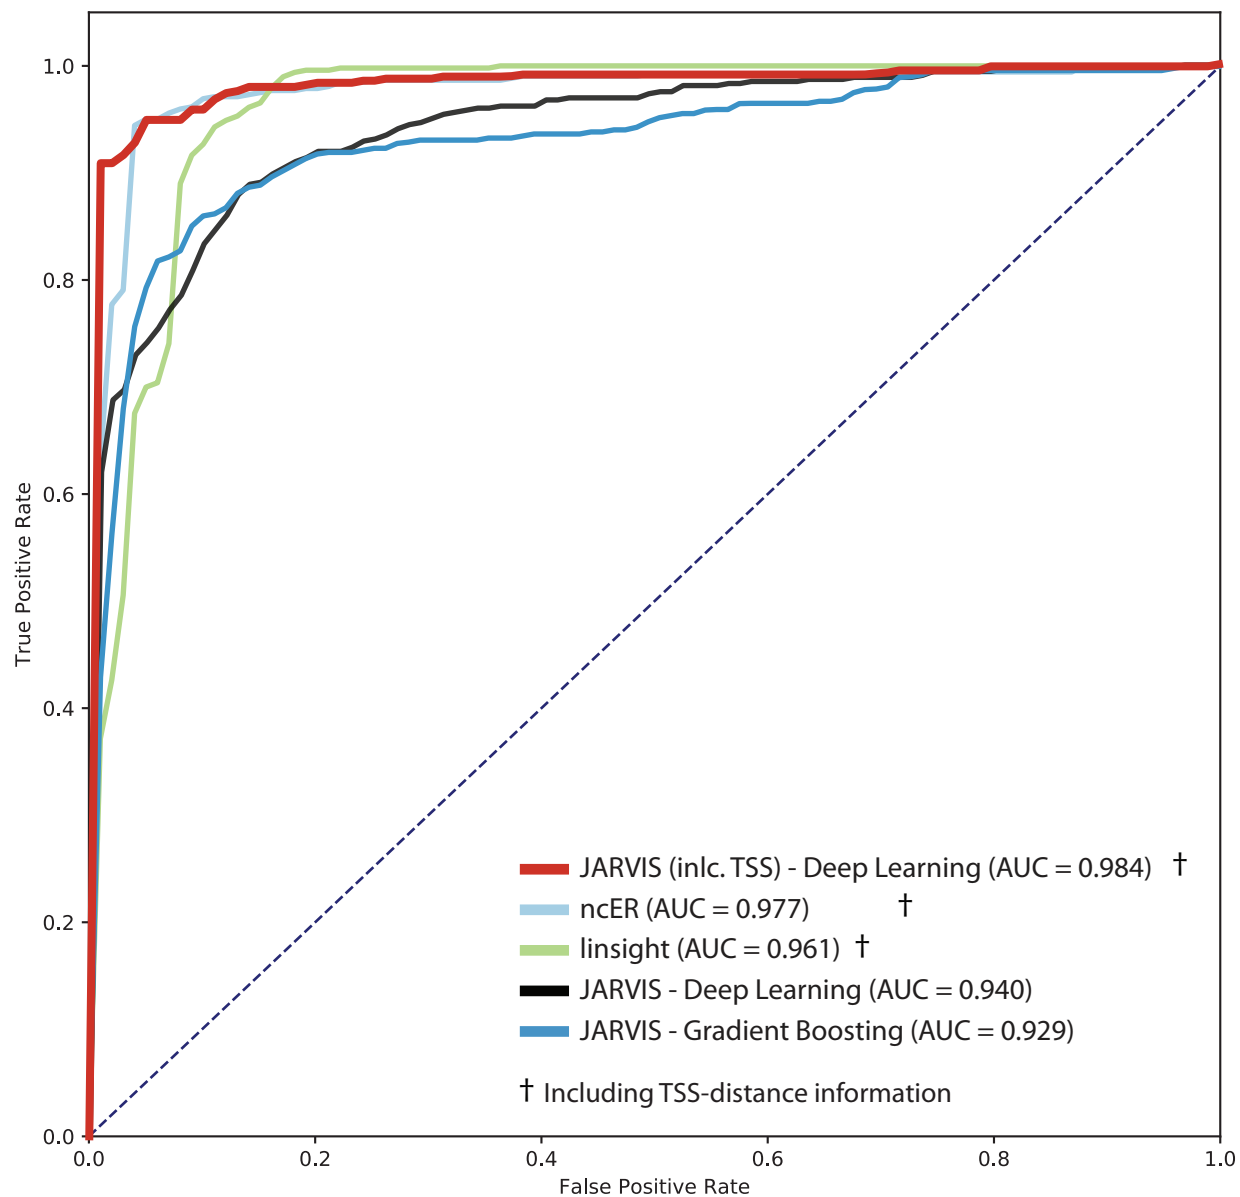

**Supplementary Figure 9.** Mean ROC curves from ClinVar non-coding pathogenic variants classification (intergenic regions, UTRs, lincRNAs, UCNEs and VISTA enhancers) with 5-fold Cross Validation. ncER and LINSIGHT integrate by default the TSS-distance information in their construction. Three models have been trained for JARVIS: 1) the default one employing the structured features and raw sequences (black color), 2) the model trained by Gradient Boosting using only the structured features (dark blue color) and a JARVIS version based on structured features that also includes the TSS-distance information (red color), outperforming all other scores in the ClinVar training set.

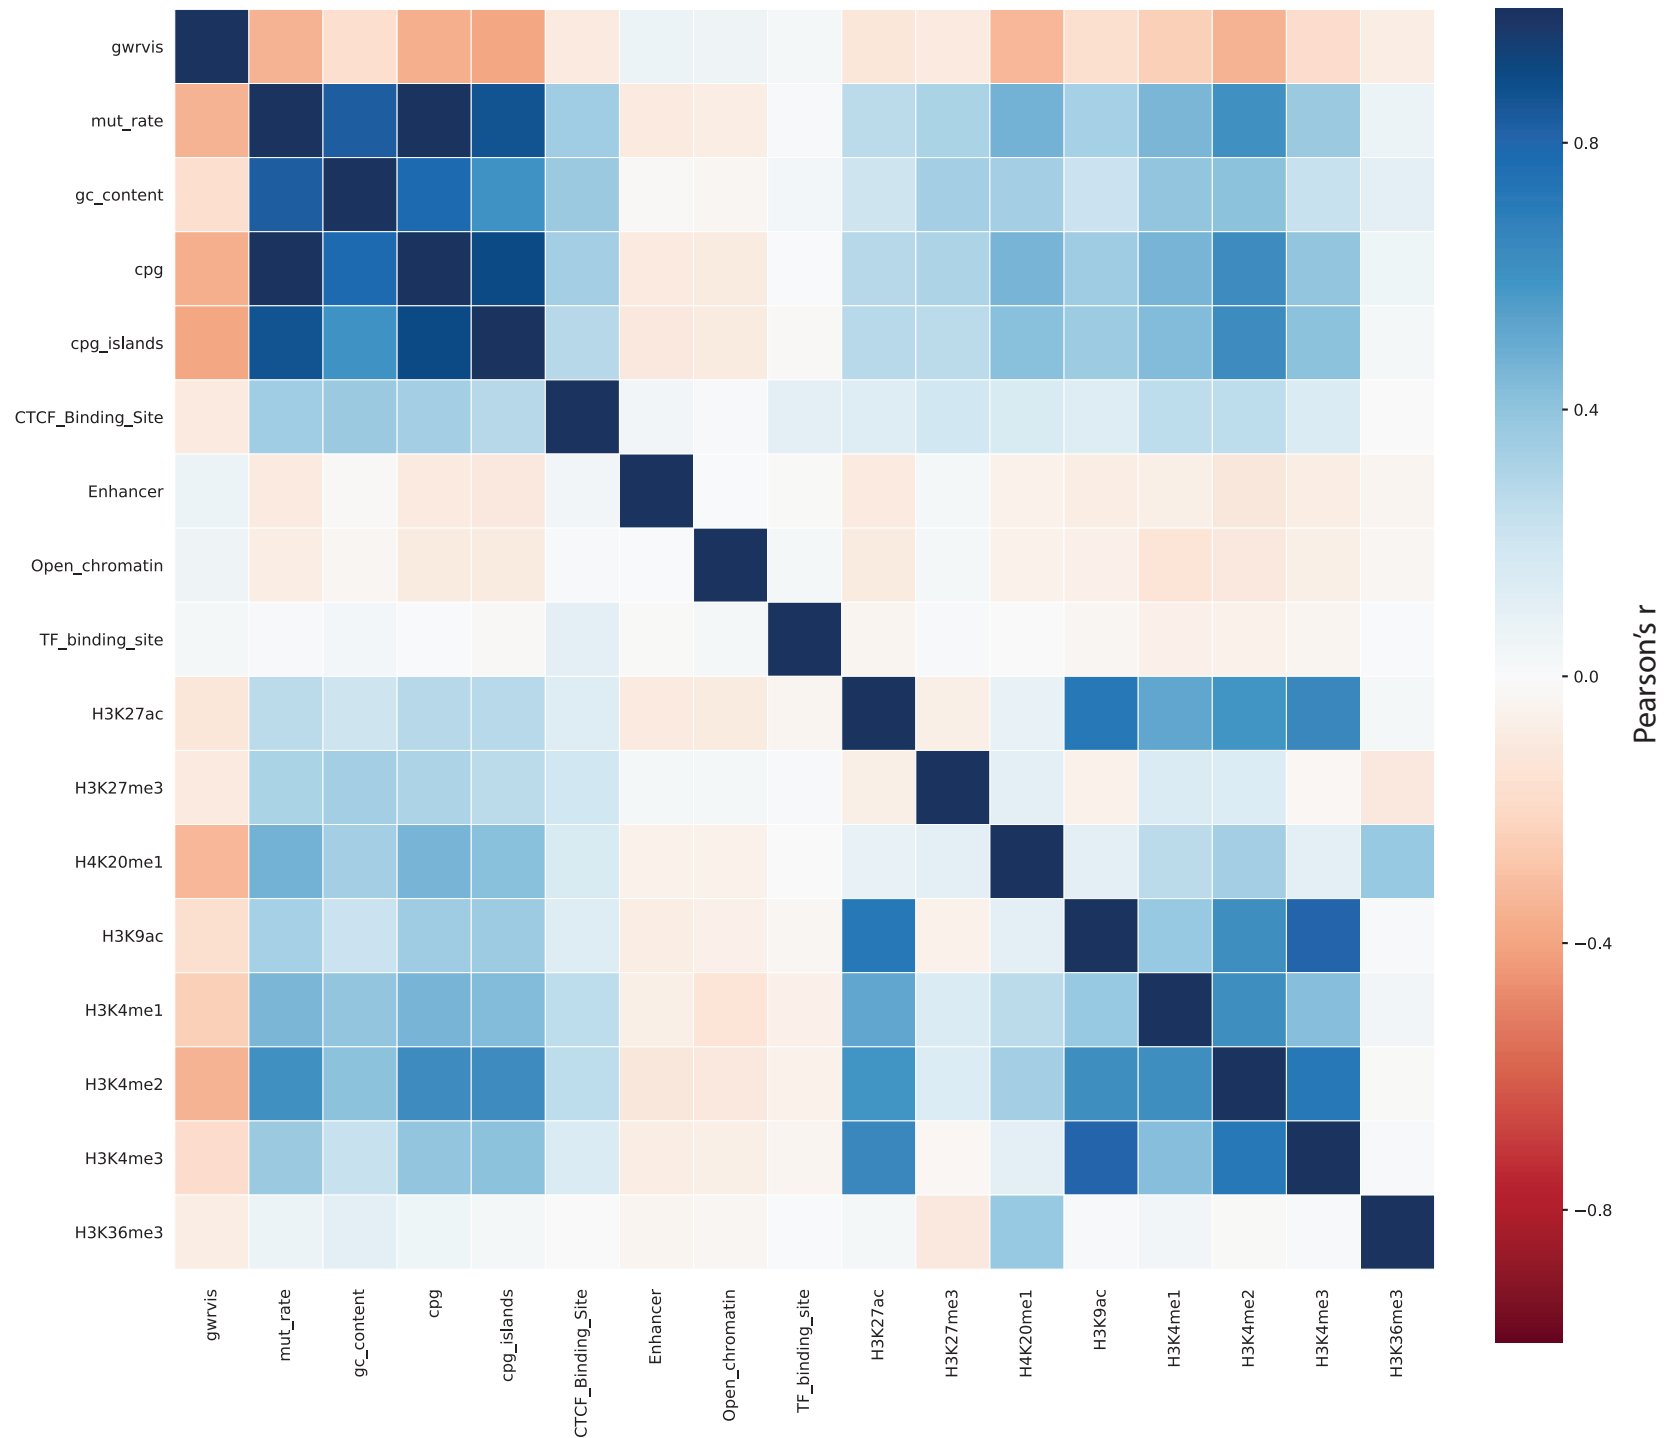

**Supplementary Figure 10.** Pearson's correlations between all pairs of structured features integrated within the JARVIS model.

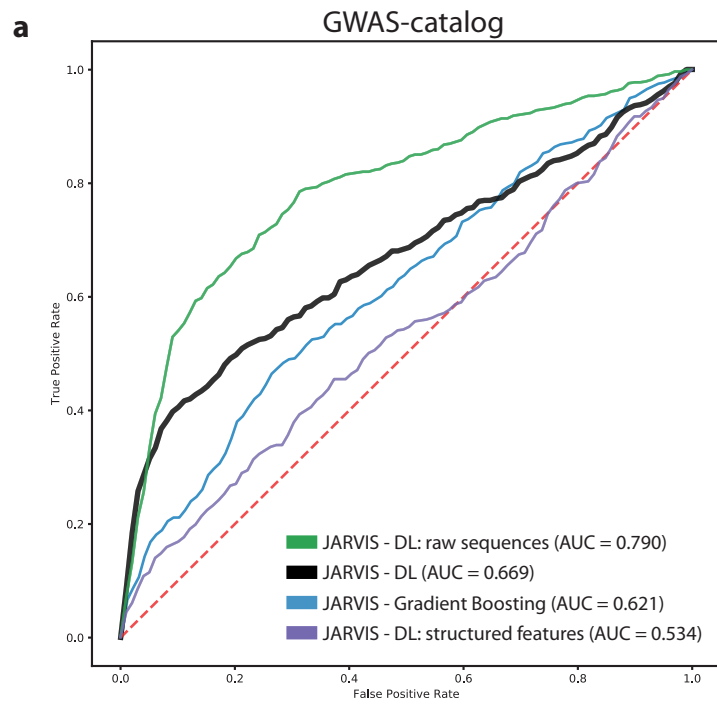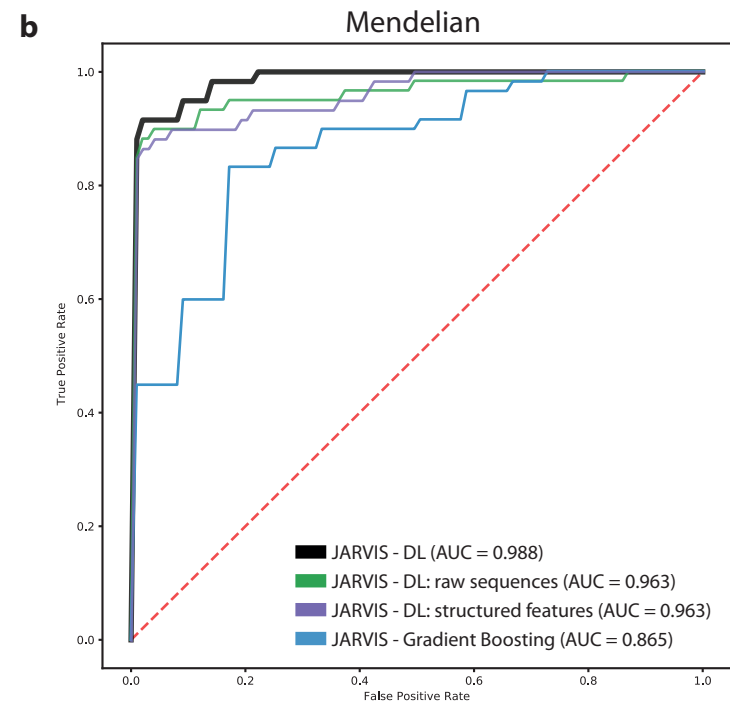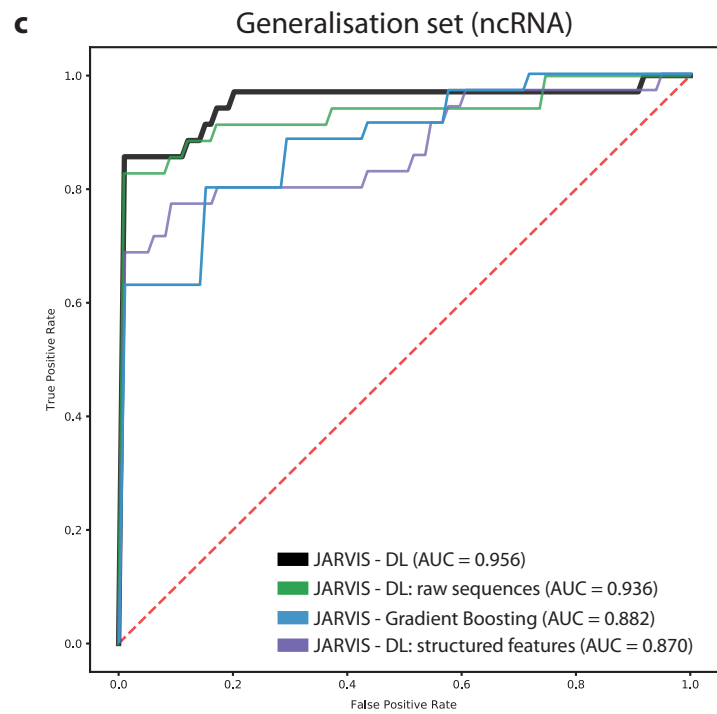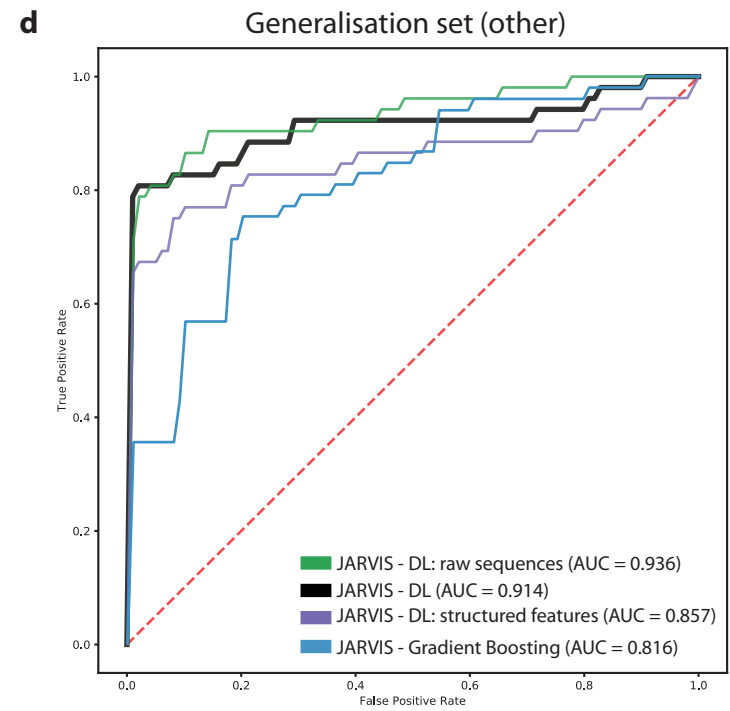

**Supplementary Figure 11.** JARVIS performance on four independent test sets (a-d) based on different training models.

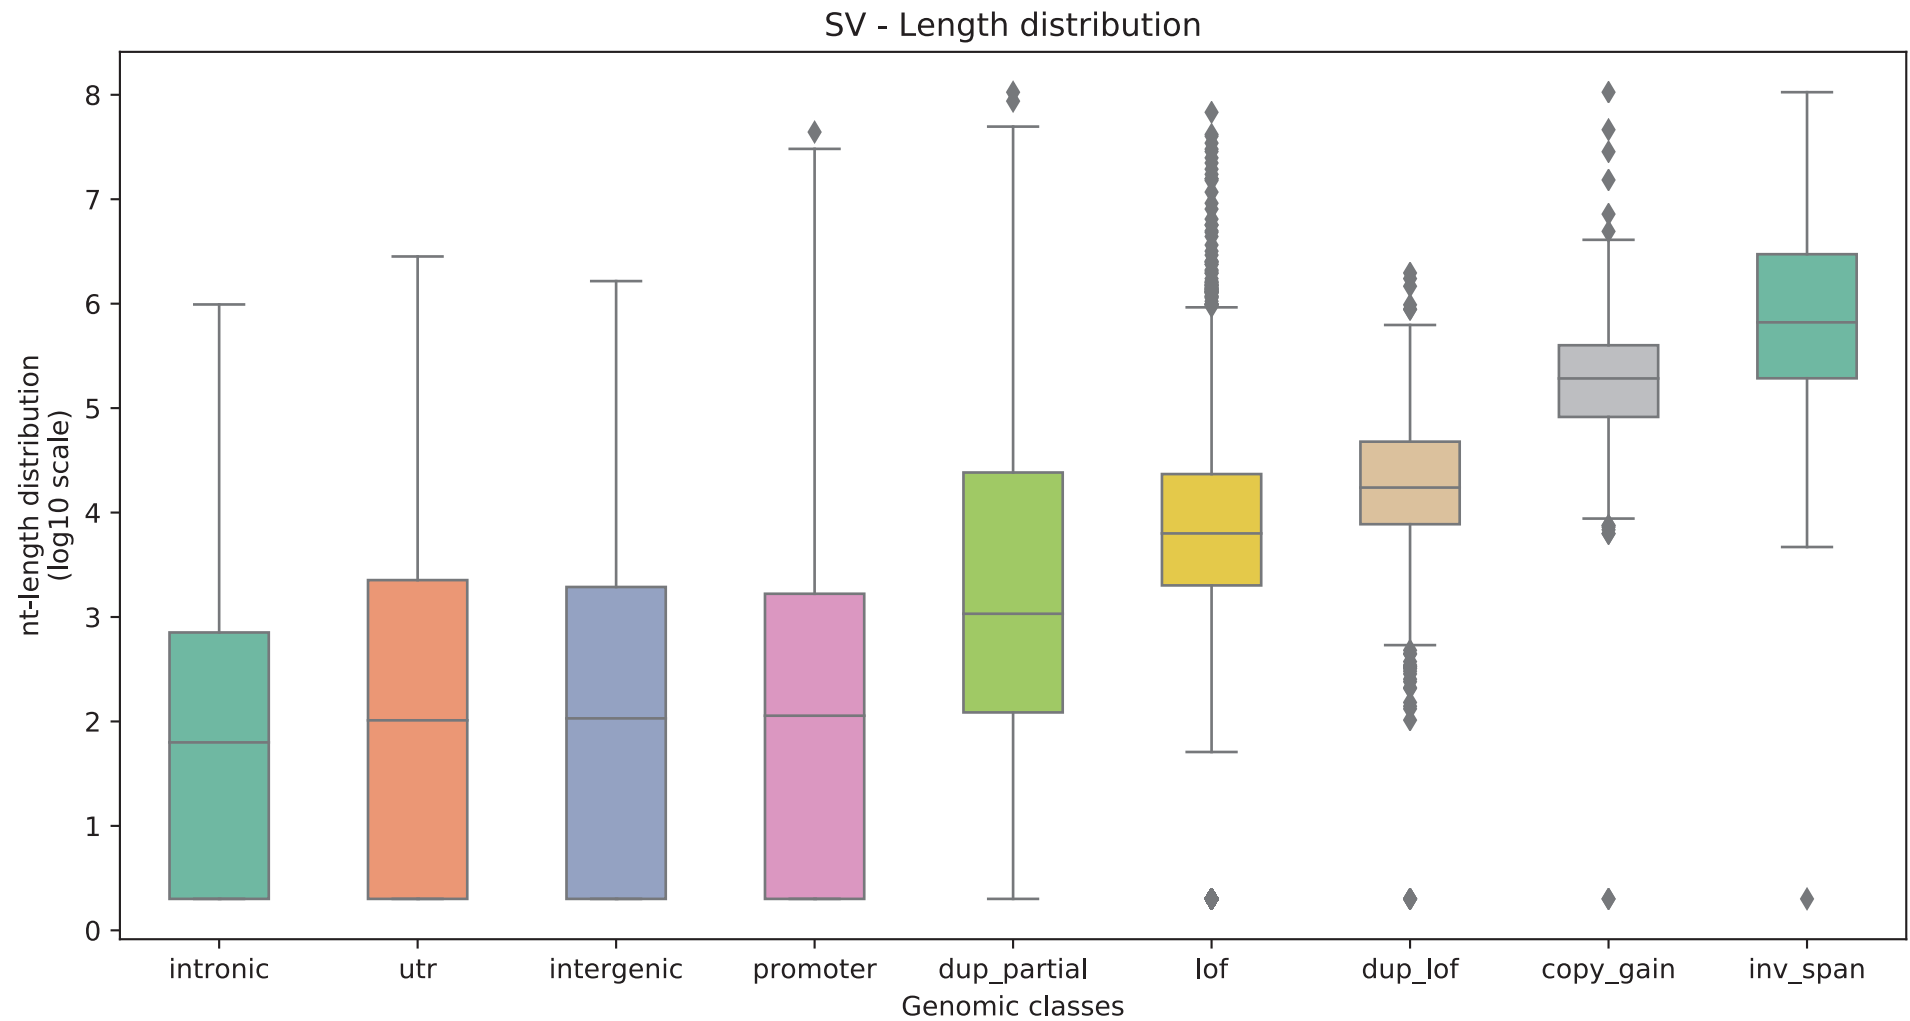

**Supplementary Figure 12.** Length distribution (log scale) across different types of structural variants from gnomAD. For each boxplot, its central line represents the median, the bounds represent the 25th and 75th percentile, and the whiskers extend up to 1.5 the interquartile range from the respective bounds.

# Classification of pathogenic Structural Variants

\* Scores with significantly worse or better performance than JARVIS (one-sided DeLong test,  $p < 0.05$ )

**a**

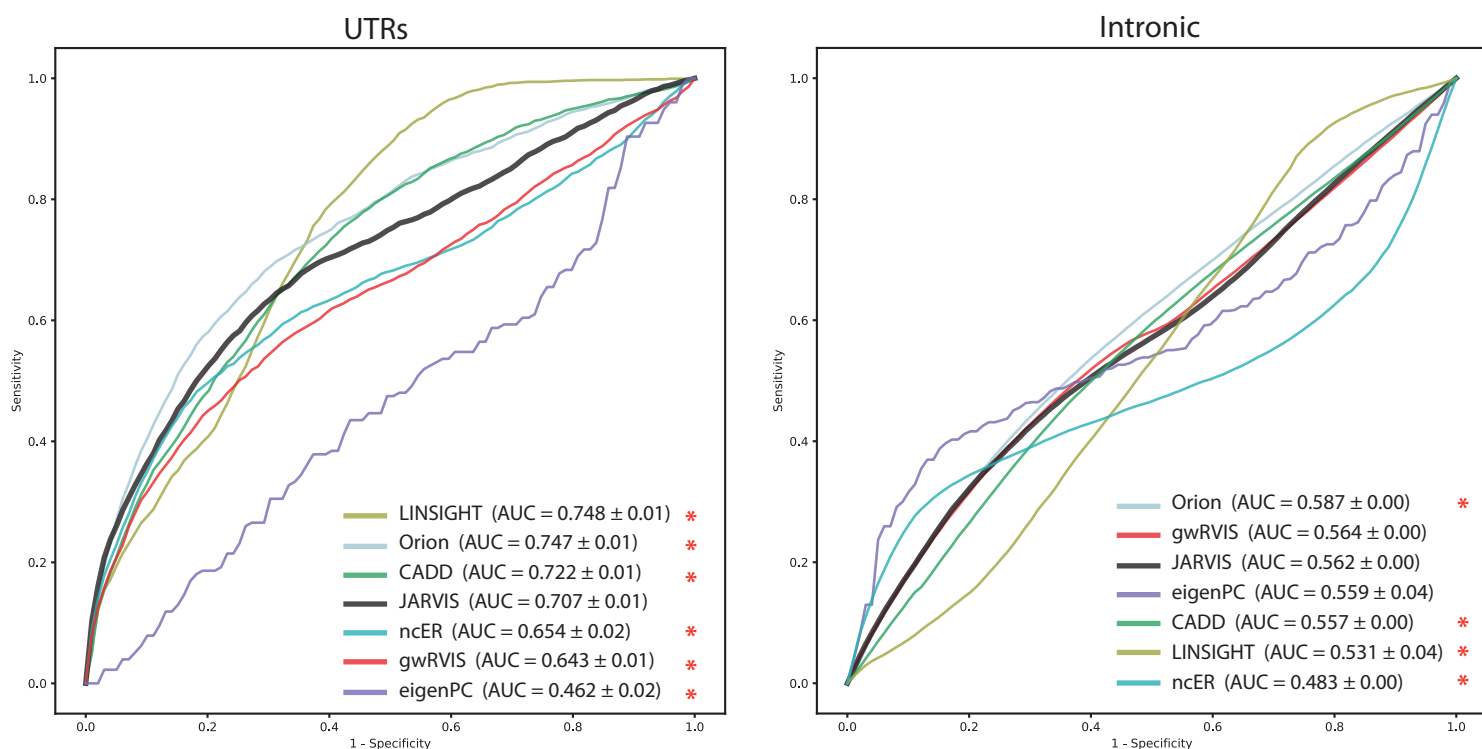

**b**

Intolerance (gwRVIS) & pathogenicity (JARVIS) profile of Structural variants in Introns

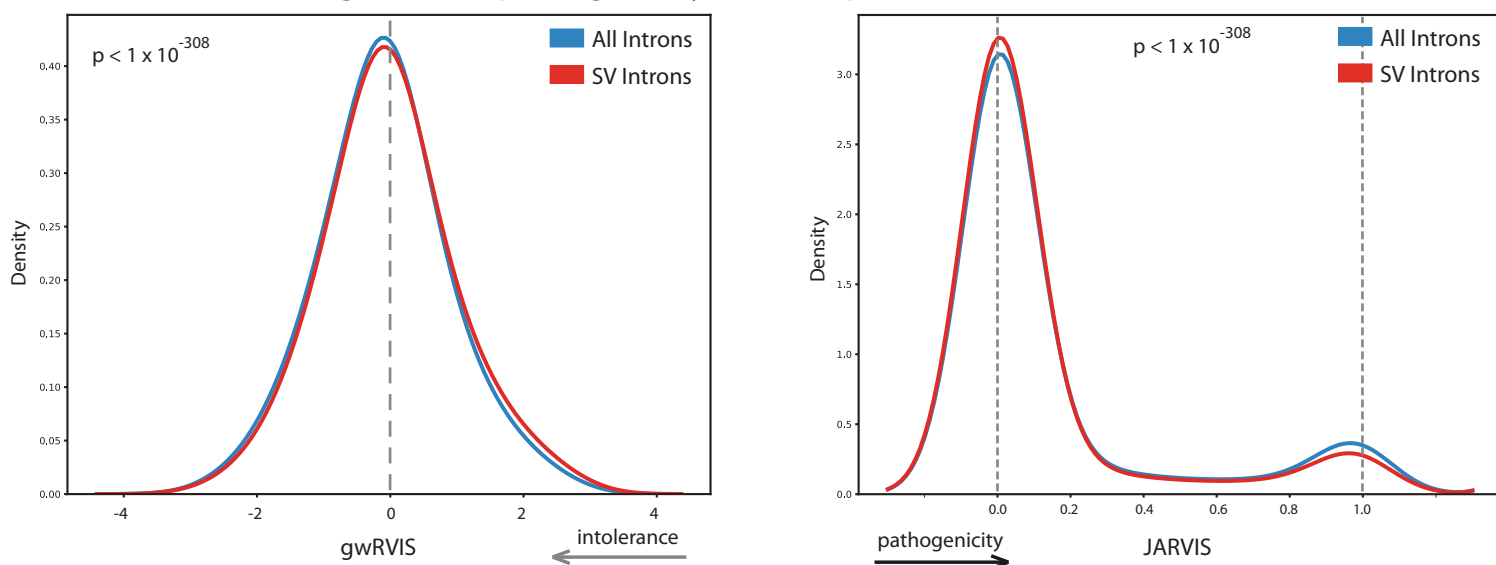

**Supplementary Figure 13.** JARVIS and gwRVIS performance on structural variants. **a)** ROC curves from classification of benign structural variants (intergenic) against different sets of putative pathogenic ones from gnomAD, annotated as UTRs or Intronic. A 10-fold cross-validation approach with a logistic regression model has been used across five scores: JARVIS, gwRVIS, LINSIGHT, ncER and Orion. **b)** gwRVIS and JARVIS distributions across the entire intronic genomic class and a set of called structural variants with intronic annotation in gnomAD. Intolerance increases towards lower gwRVIS values while pathogenicity likelihood increases with greater JARVIS values.

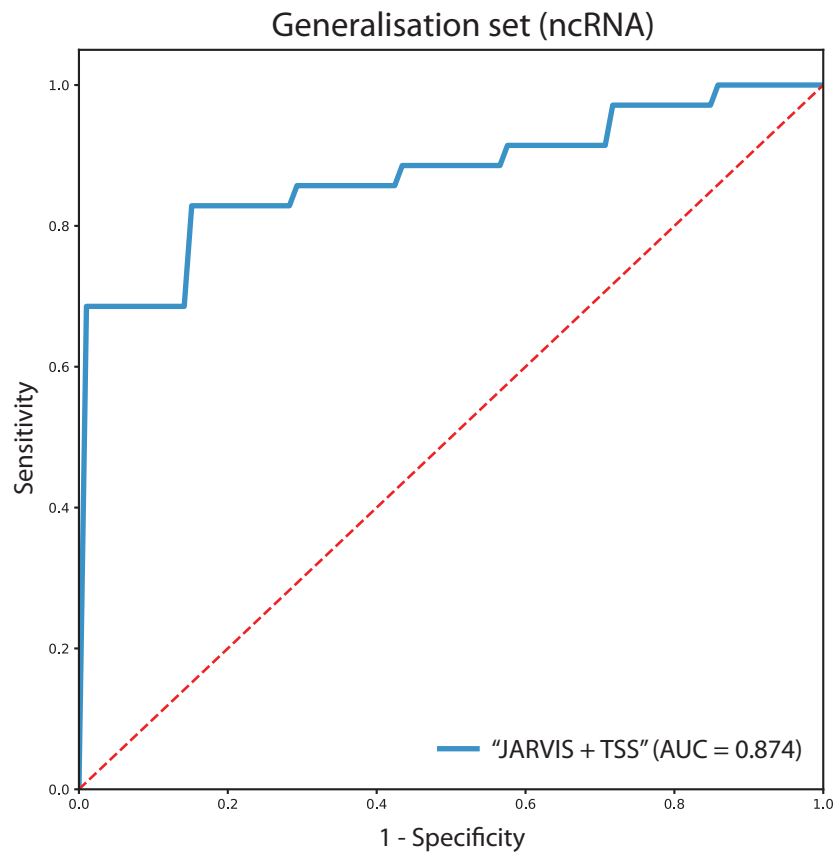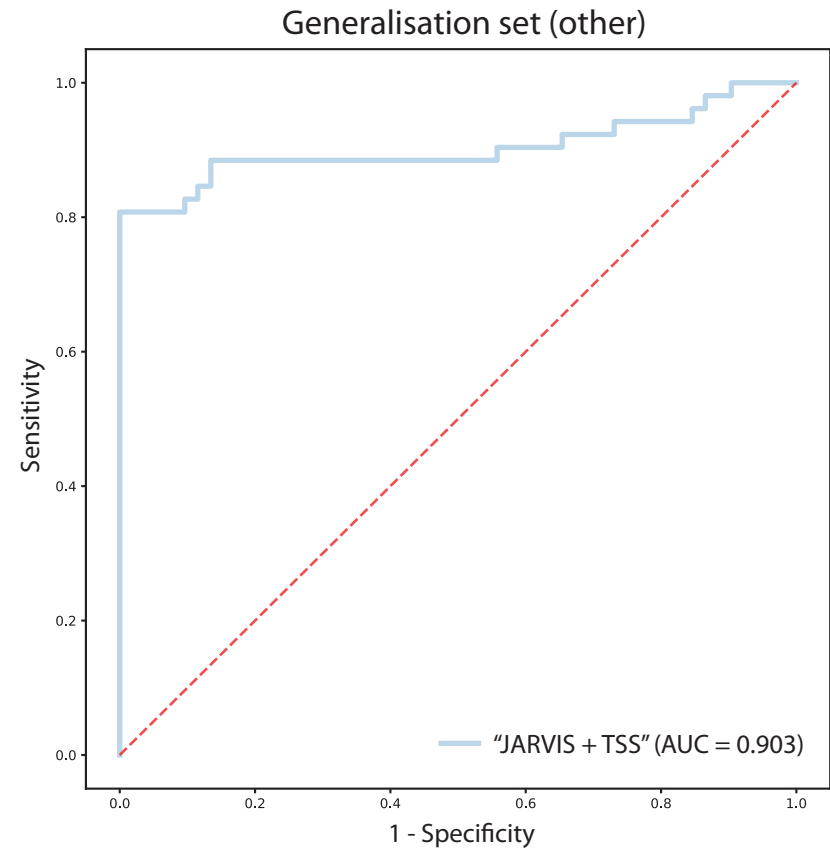

**Supplementary Figure 14.** JARVIS performance on two test sets after having been trained with the TSS distance as an additional feature in the default multi-module deep learning network.

gwRVIS (without accounting for Heteroskedasticity)

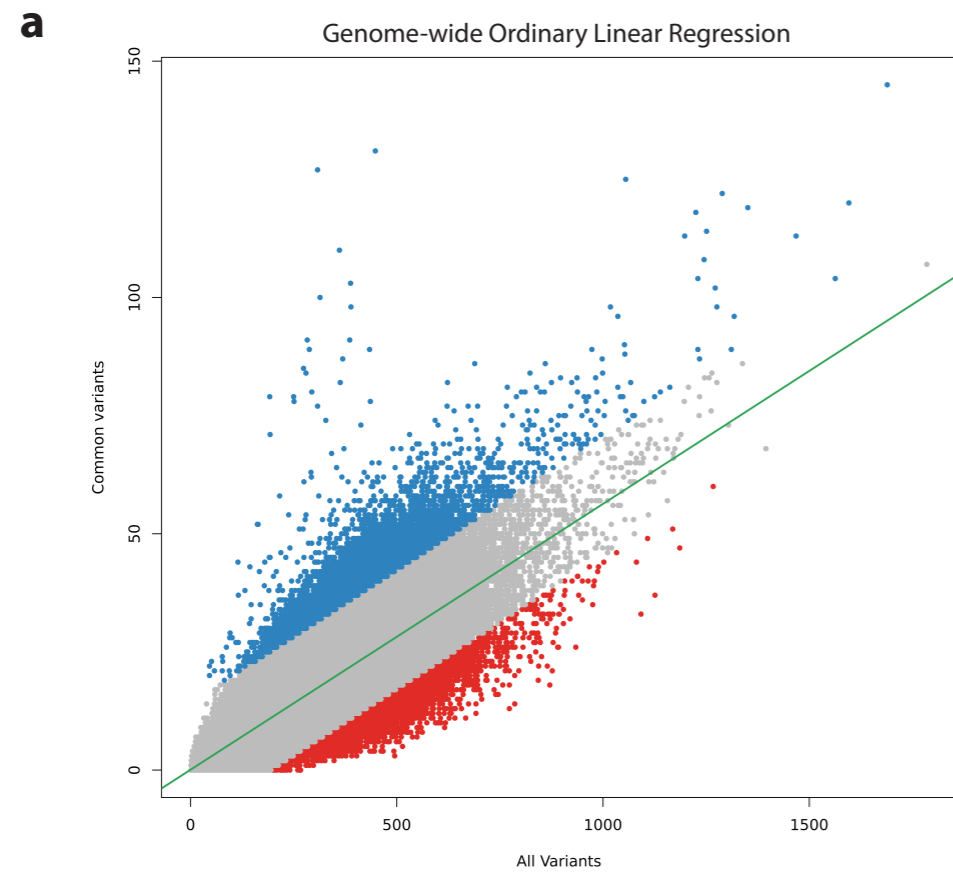

gwRVIS-het (accounting for Heteroskedasticity)

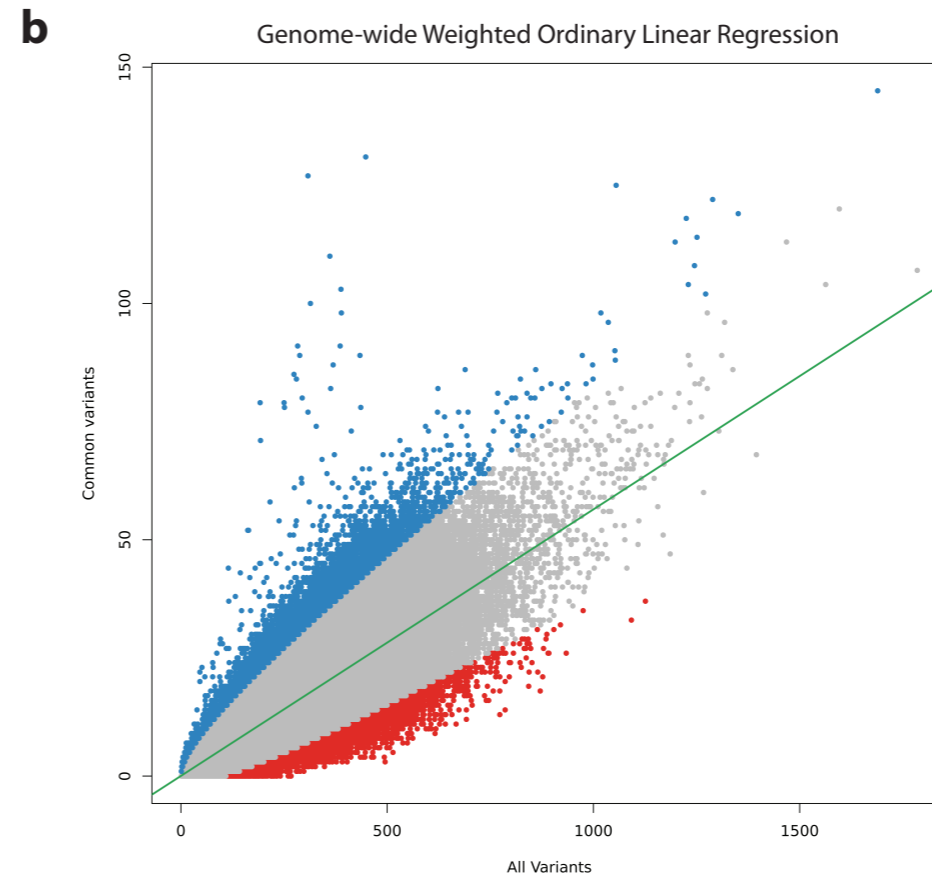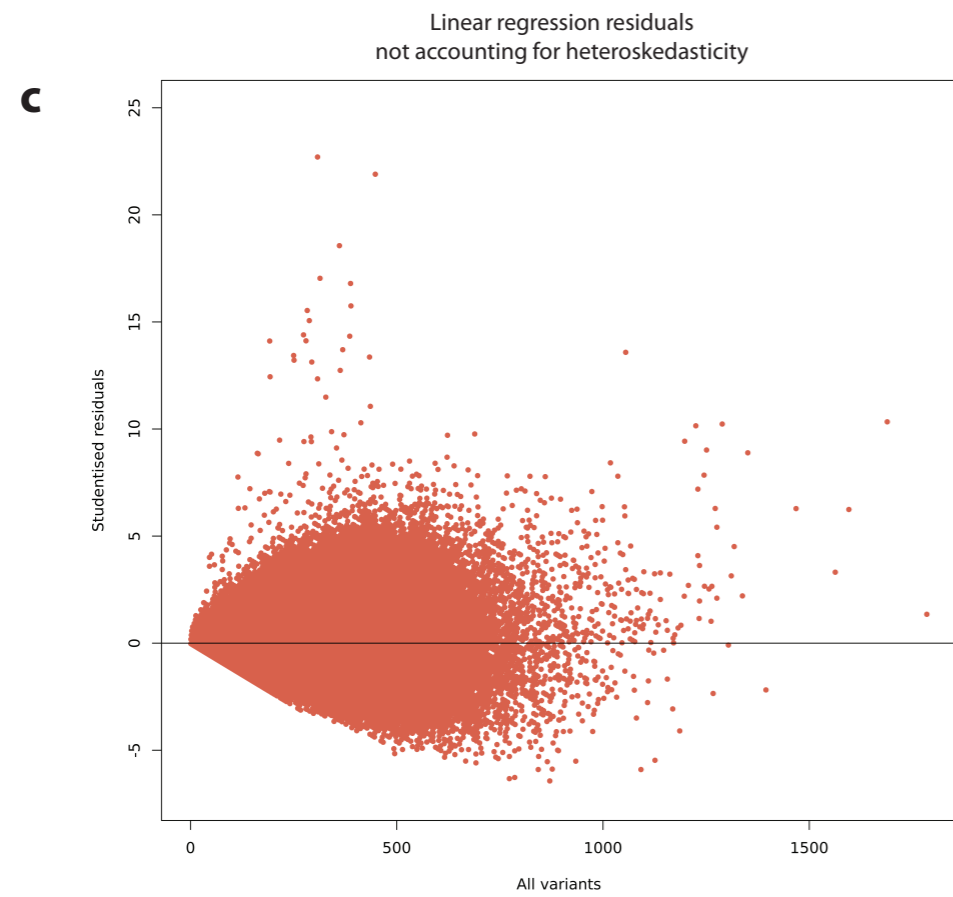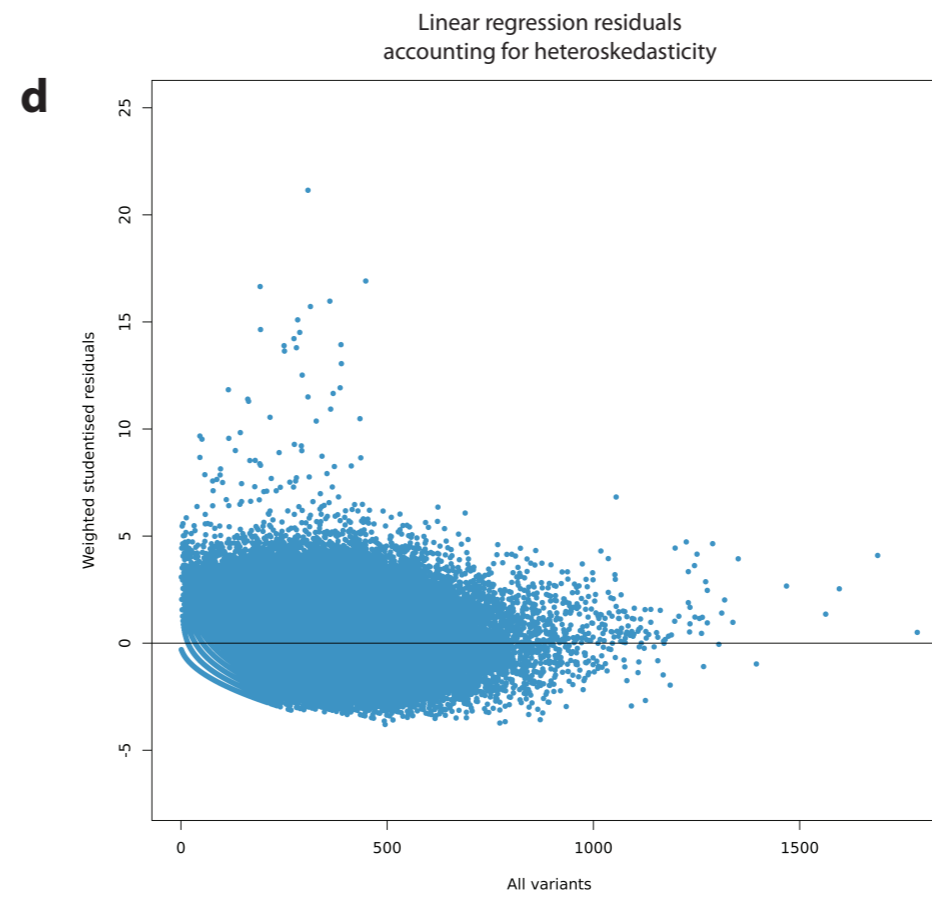

- Pearson's r between gwRVIS and gwRVIS-het: 0.957,  $p < 1e-308$

**Supplementary Figure 15.** gwRVIS calculation with or without accounting for heteroskedasticity. **a)** An ordinary linear regression model is fit between “all” and “common” (MAF > 0.1%) variants across all windows. **b)** A weighted ordinary linear regression model is fit, accounting for the heteroskedasticity observed in the windows with lower values of “all variants”. gwRVIS is shown in **c)** and **d)** for the two models respectively. Pearson's correlation between the two versions of gwRVIS calculations is 0.957 ( $p < 1e-308$ ; two-sided t-test).

Statistical significance of differences between gwRVIS' predictive power and other genome-wide scores in ClinVar pathogenic non-coding variant classification

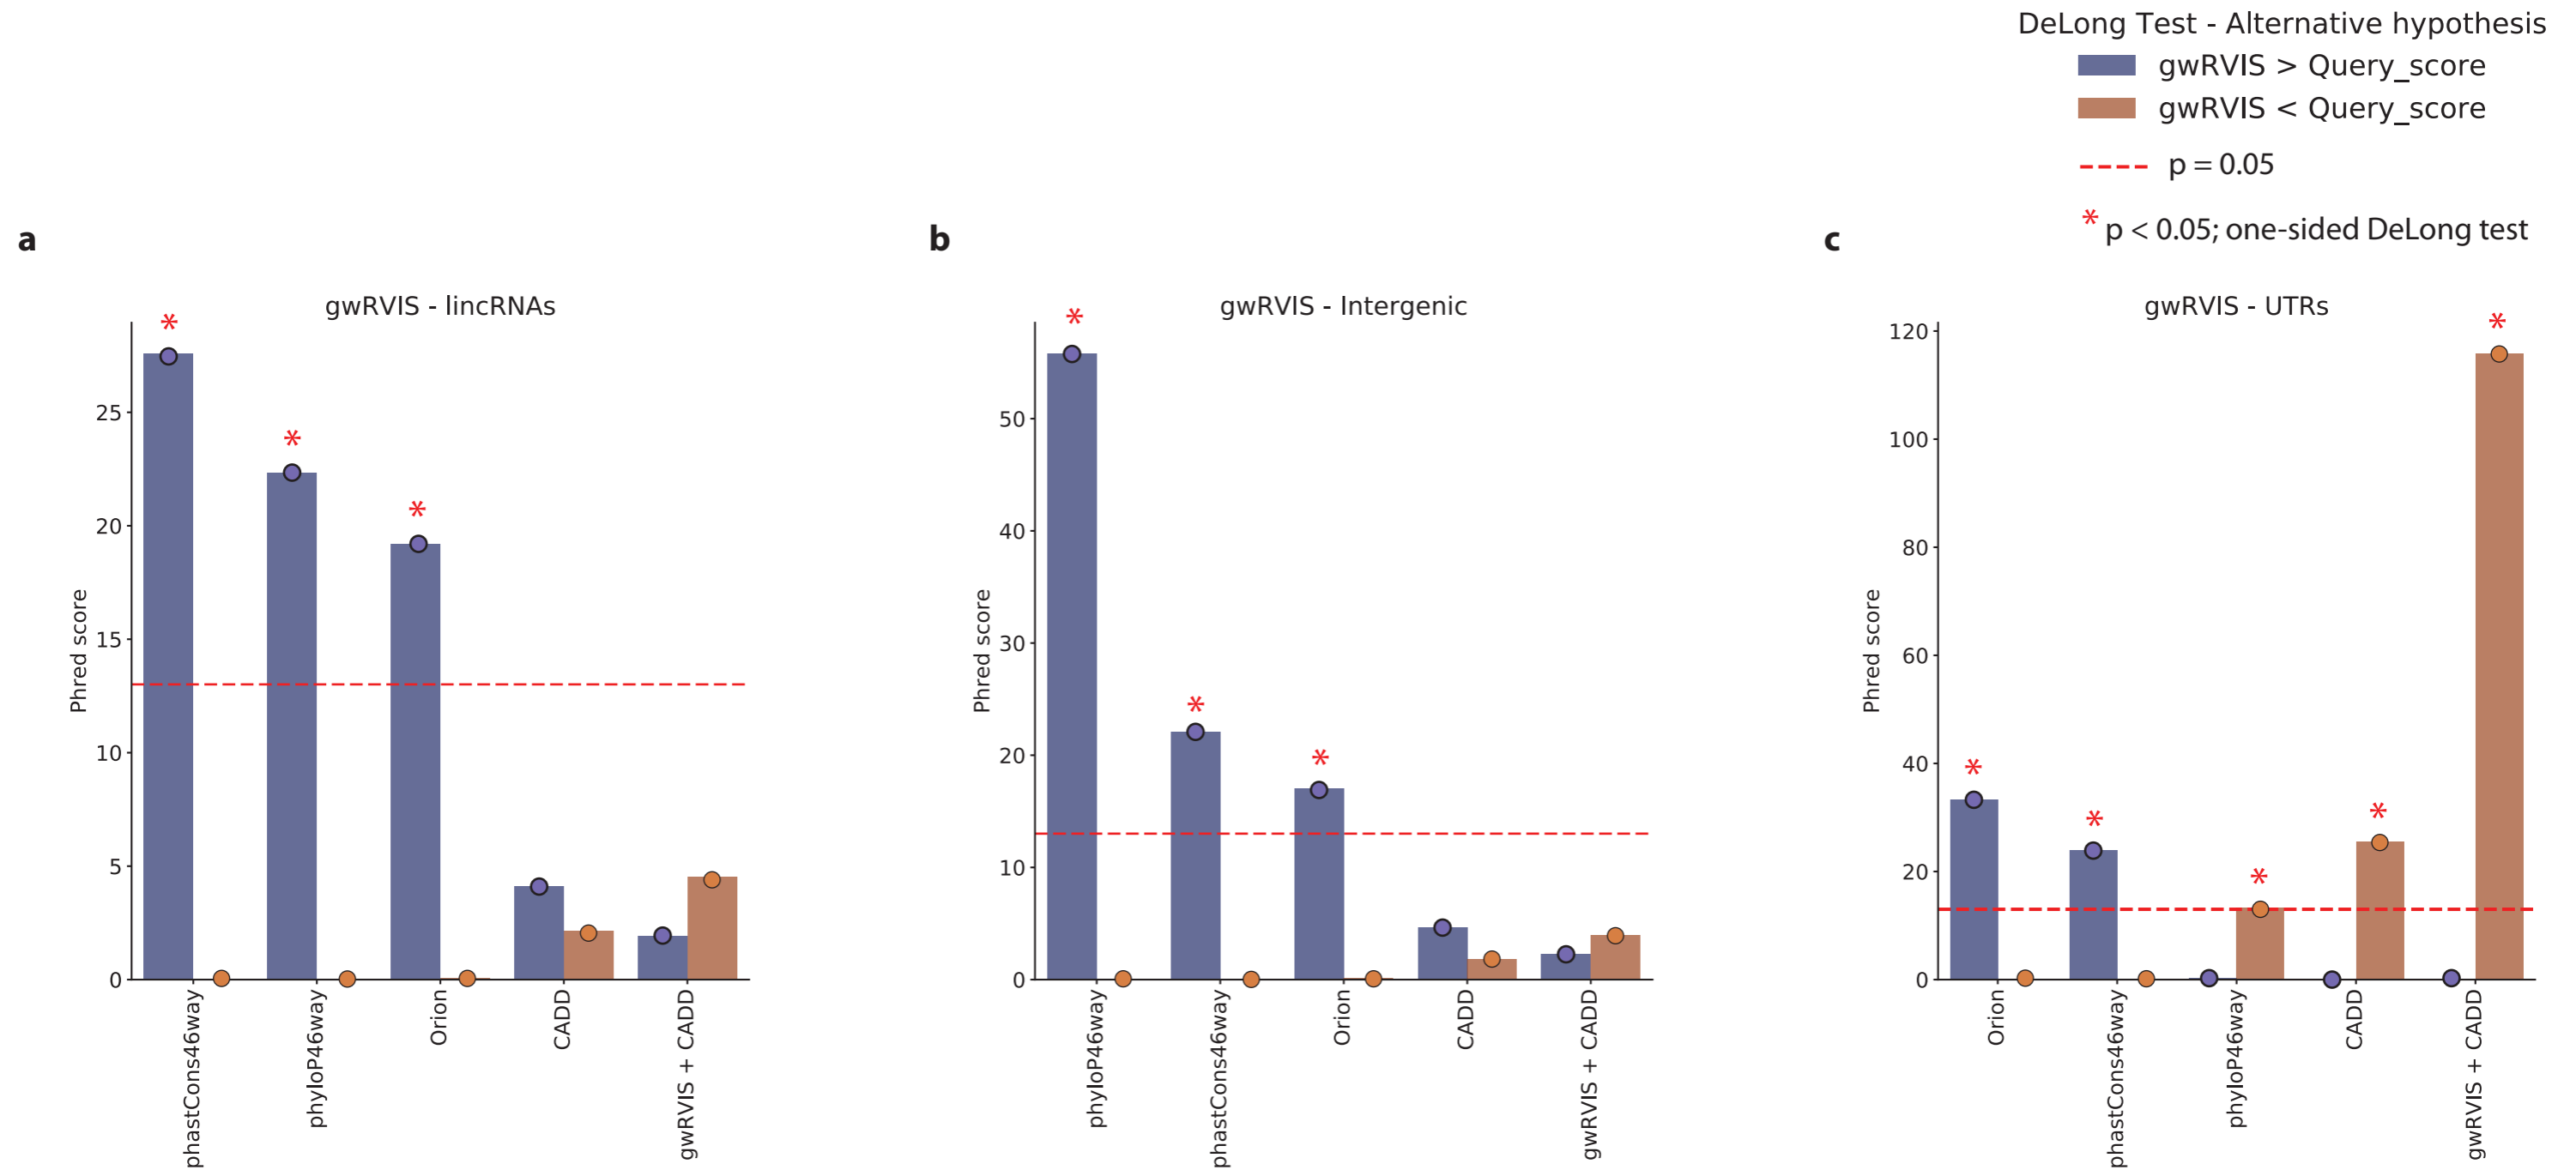

**Supplementary Figure 16.** Statistical significance of the differences in gwRVIS predictive power against four other genome-wide scores and a combined model integrating CADD & gwRVIS, using one-sided DeLong's tests for both alternative hypotheses (i.e. "less" or "greater"). The predictive power of each score is assessed via the average AUC score attained with 5-fold cross-validation during ClinVar-pathogenic vs denovodb-benign variants classification. Results are shown separately for the classification task across three non-coding genomic classes: **a)** lincRNAs, **b)** Intergenic regions and **c)** UTRs, and are visualised as Phred scores. The red dashed horizontal line marks the  $p = 0.05$  significance threshold [ $y = \text{Phred}(0.05)$ ]. Barplots in light purple colour that exceed the significance threshold of  $\text{Phred}(0.05)$  support that gwRVIS significantly outperforms the respective score ( $\text{gwRVIS} > \text{Query\_score}$ ). On the other hand, barplots in orange colour that exceed the significance threshold of  $\text{Phred}(0.05)$  support that gwRVIS significantly *underperforms* the respective score ( $\text{gwRVIS} < \text{Query\_score}$ ). Raw p-values from each DeLong test are available at Supplementary Tables 1-3.



# Matched variant distances from closest TSS

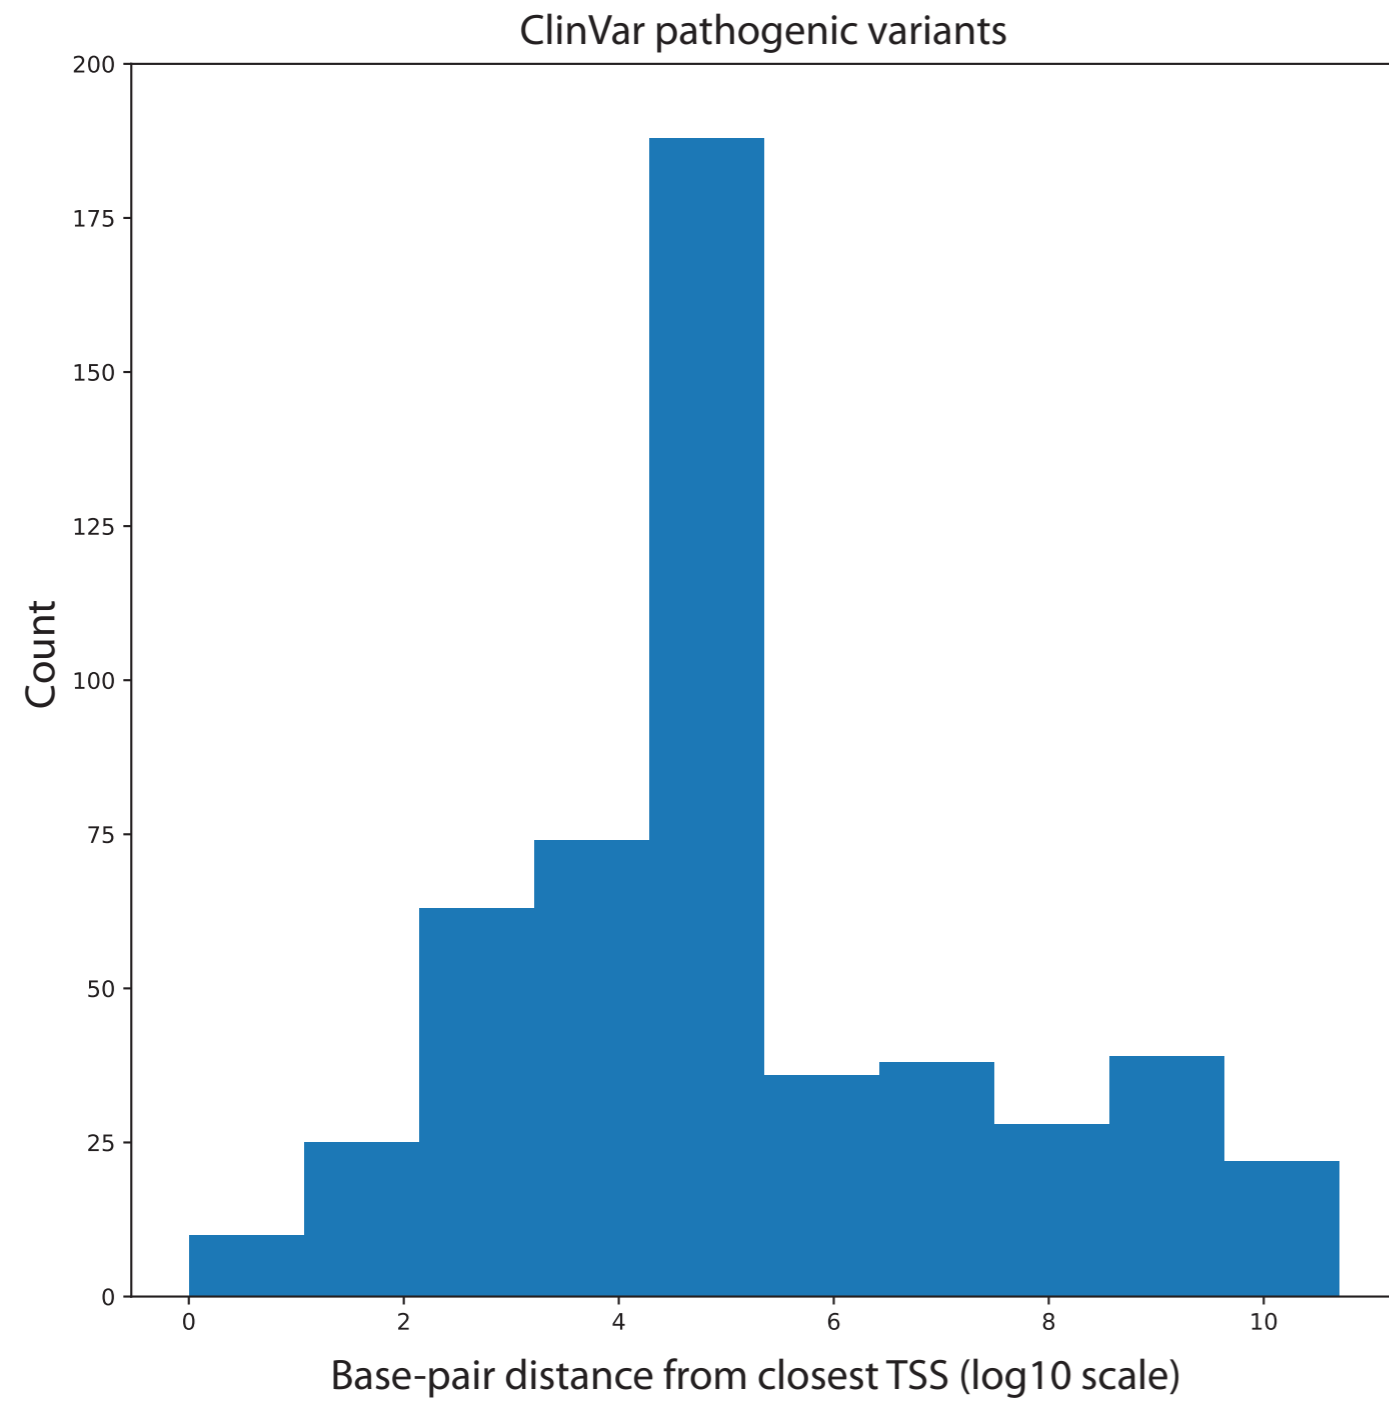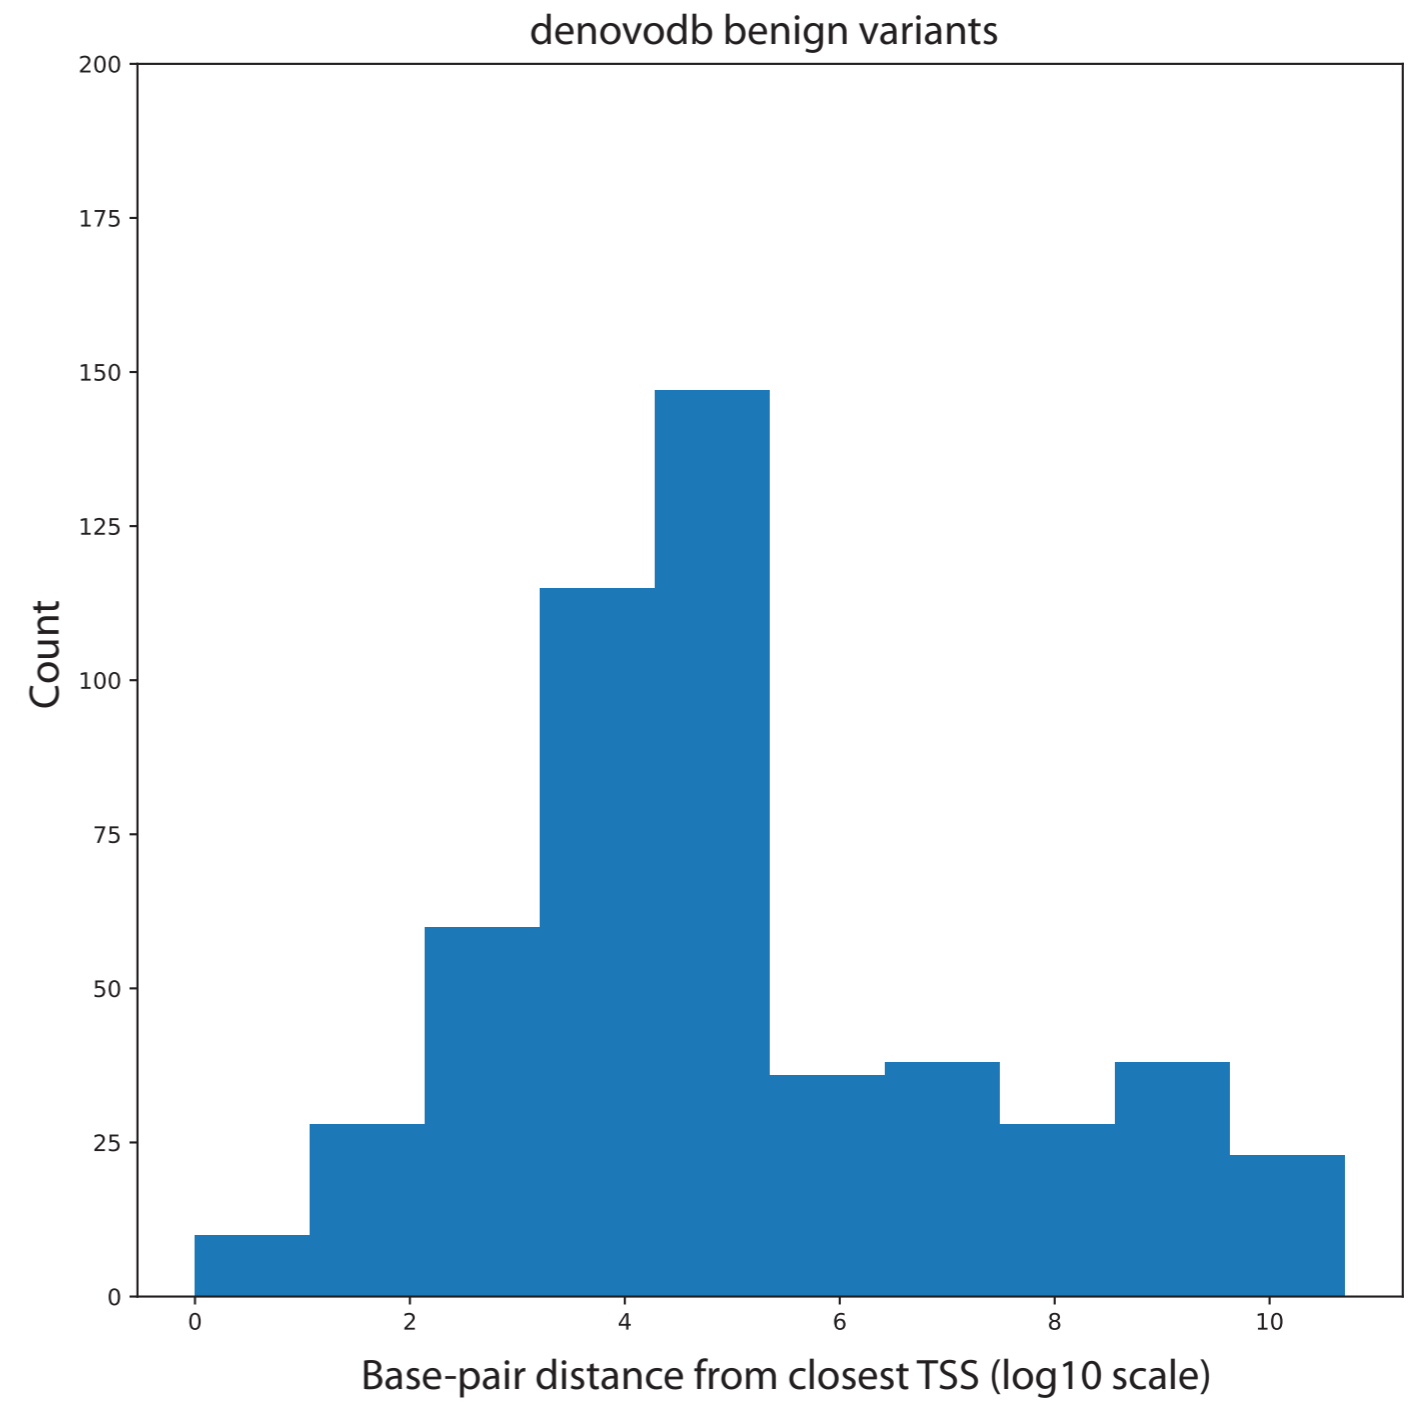

**Supplementary Figure 17.** Distribution of matched variant distances from closest TSS. **a)** ClinVar pathogenic variants **b)** denovo-db benign variants.

- \* Scores with significantly worse or better performance than JARVIS (one-sided DeLong test,  $p < 0.05$ )
- ◇ Scores without conservation information

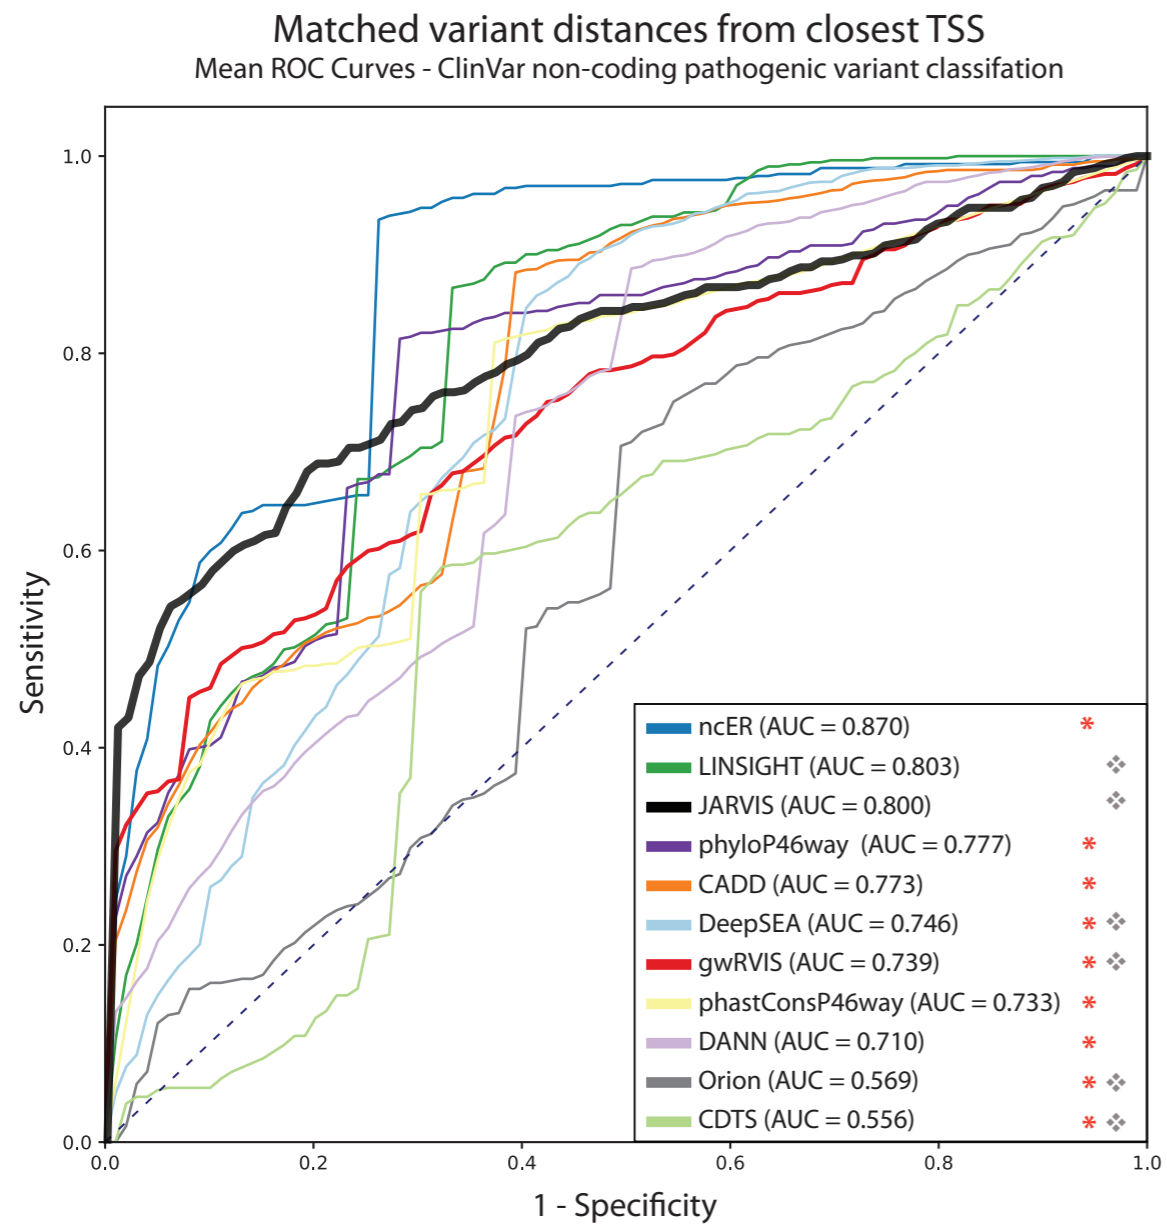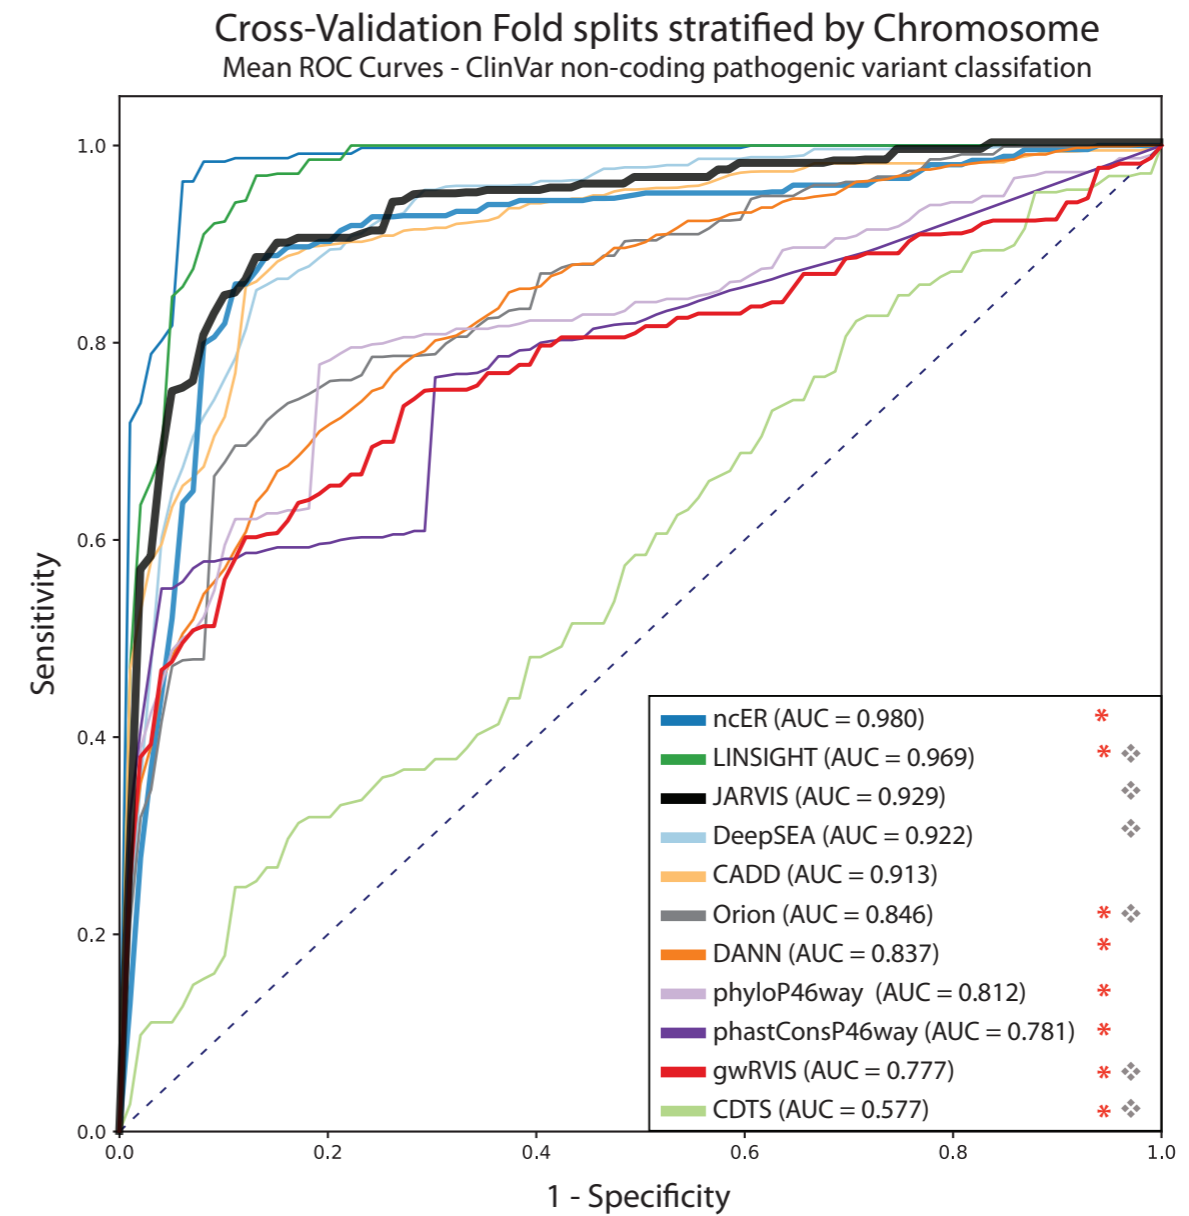

**Supplementary Figure 18.** JARVIS 5-fold cross-validation training performance using two alternative strategies: **a)** training set of ClinVar pathogenic and denovodb benign variants matched in terms of their distances to closest TSS and **b)** cross-validation splits stratified by chromosome, to ensure that, at each cross-validation step, variants from the same chromosomes are not part of the training and test set at the same time. A set of 10 other genome-wide scores have been tested with 5-fold cross-validation on the same datasets (eigenPC did not have sufficient number of data points using these strategies and thus is omitted from these comparisons).

## JARVIS: Cross-validation training performance on pathogenic non-coding variant classification

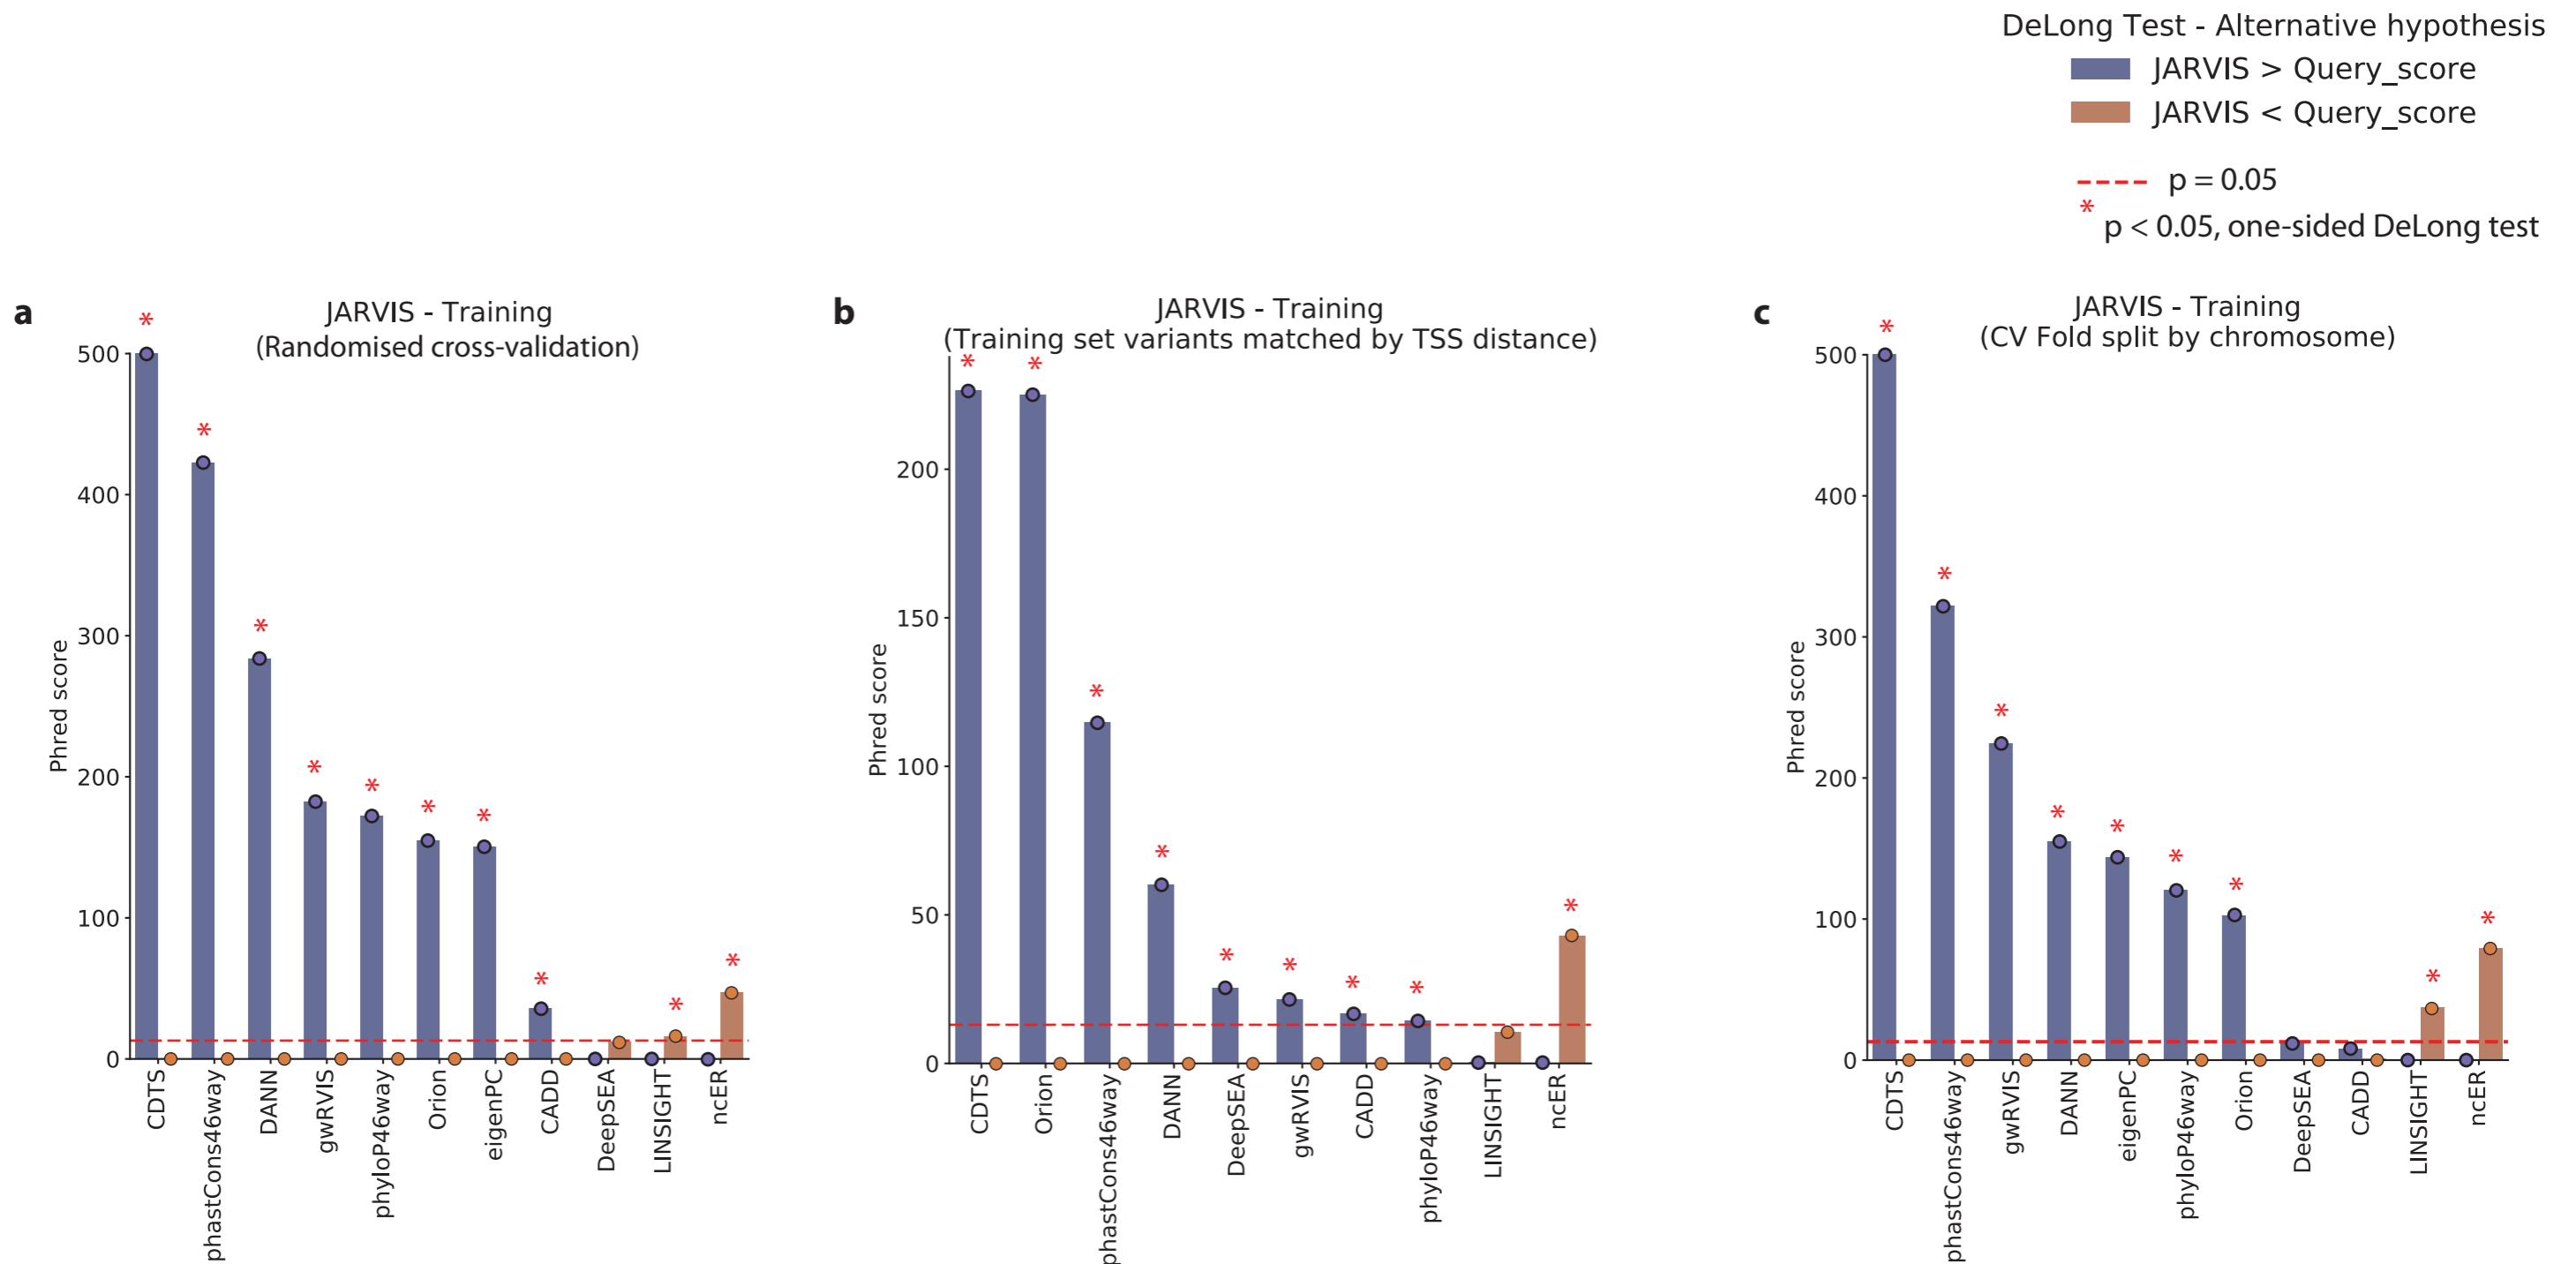

**Supplementary Figure 19.** Statistical significance of the differences in JARVIS predictive power against 11 other genome-wide scores using one-sided DeLong's tests for both alternative hypotheses (i.e. "less" or "greater"). The predictive power of each score is assessed via the average AUC score attained with 5-fold cross-validation during ClinVar-pathogenic vs denovodb-benign non-coding variant classification. DeLong's test results are visualised as Phred scores (scores > 500 are capped at this value for visualisation purposes). JARVIS training was performed with three different strategies: **a**) random cross-validation splits **b**) using a training set of ClinVar pathogenic and denovodb benign variants matched in terms of their distances to closest TSS and **c**) cross-validation splits stratified by chromosome (eigenPC did not have sufficient number of data points with a score for strategies *b* and *c* and thus is not shown in these plots). The red dashed horizontal line marks the  $p=0.05$  significance threshold [  $y = \text{Phred}(0.05)$  ]. Barplots in light purple colour that exceed the significance threshold of  $\text{Phred}(0.05)$  support that JARVIS significantly outperforms the respective score (JARVIS > Query\_score). On the other hand, barplots in orange colour that exceed the significance threshold of  $\text{Phred}(0.05)$  support that JARVIS significantly *underperforms* the respective score (JARVIS < Query\_score). Raw p-values from each DeLong test are available at Supplementary Tables 4-6.

# JARVIS: Cross-validation performance on four validation sets

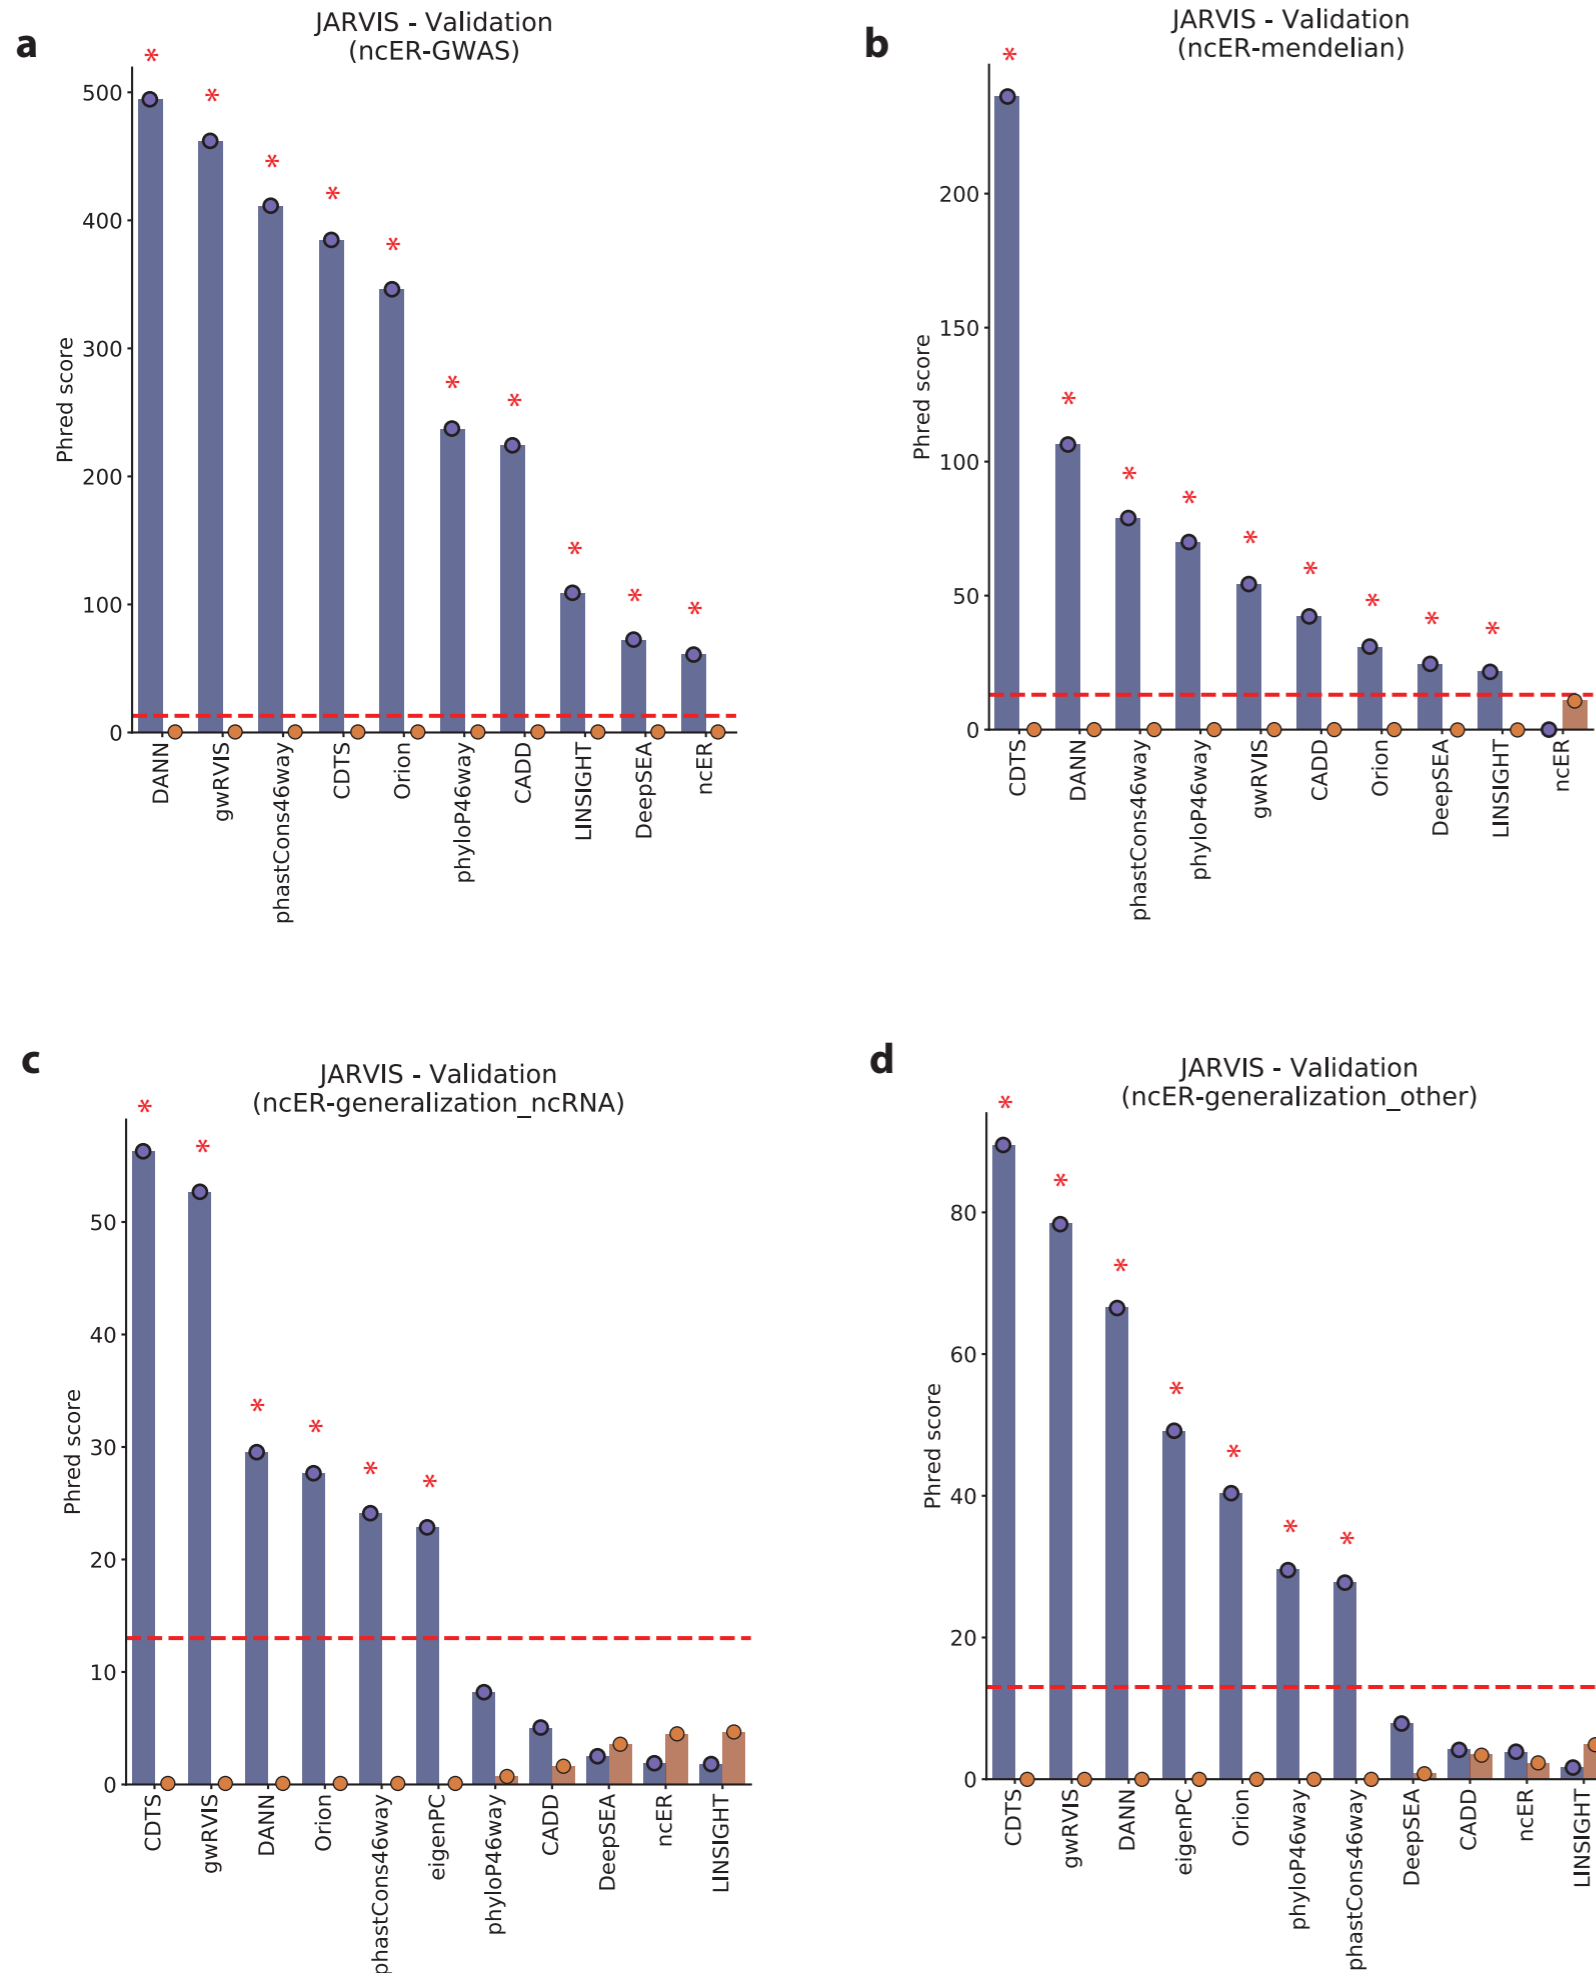

DeLong Test - Alternative hypothesis

- JARVIS > Query\_score
- JARVIS < Query\_score

----- p = 0.05

\* p < 0.05, one-sided DeLong test

**Supplementary Figure 20.** Statistical significance of the differences in JARVIS predictive power against 11 other genome-wide scores using one-sided DeLong’s tests for both alternative hypotheses (i.e. “less” or “greater”). The predictive power of each score is assessed via the average AUC score attained with 5-fold cross-validation applied on each validation set. DeLong’s test results are visualised as Phred scores (scores > 500 are capped at this value for visualisation purposes). Four validation sets have been used based on their predicted effect: **a**) GWAS, **b**) mendelian, **c**) ncER-generalisation dataset ‘ncRNA’ and **d**) ncER-generalisation dataset ‘other’ (eigenPC did not have sufficient number of data points with a score for strategies *a* and *b* and thus is not shown in these plots). The red dashed horizontal line marks the  $p=0.05$  significance threshold [  $y=Phred(0.05)$  ]. Barplots in light purple colour that exceed the significance threshold of  $Phred(0.05)$  support that JARVIS significantly outperforms the respective score (JARVIS > Query\_score). On the other hand, barplots in orange colour that exceed the significance threshold of  $Phred(0.05)$  support that JARVIS significantly *underperforms* the respective score (JARVIS < Query\_score). Raw p-values from each DeLong test are available at Supplementary Tables 7-10.

## JARVIS: Cross-validation test performance on Structural Variant classification

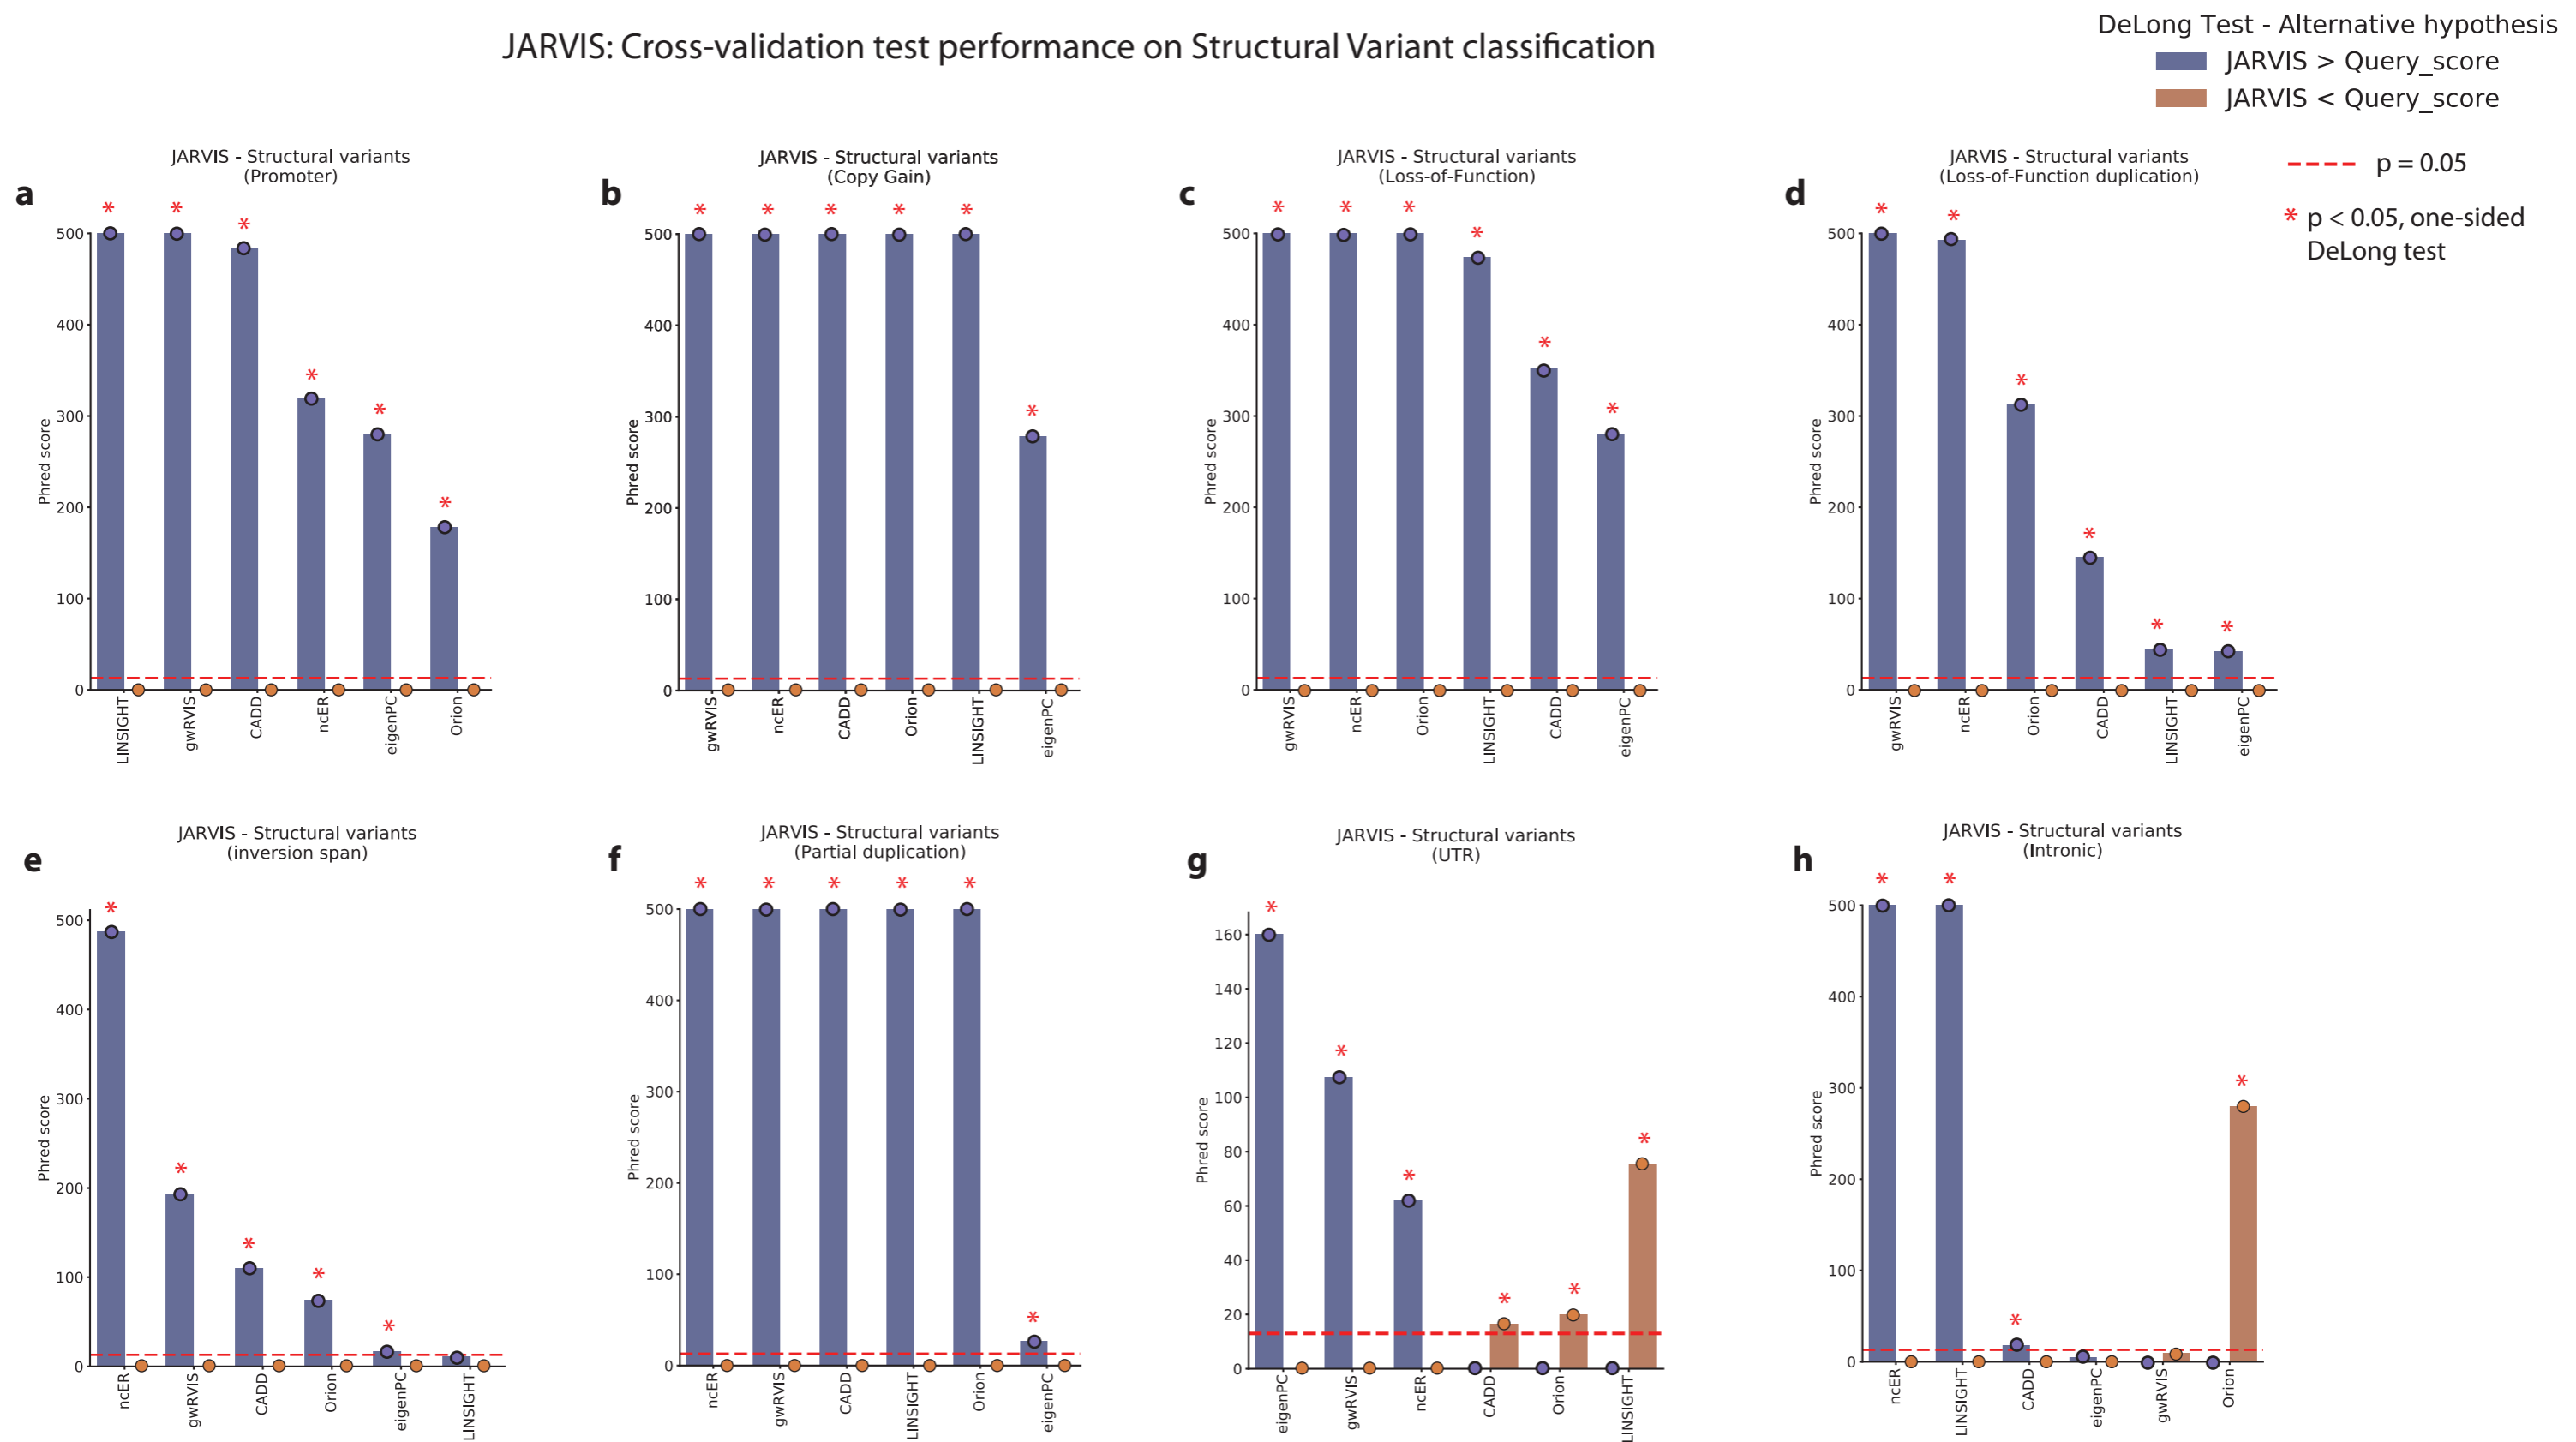

**Supplementary Figure 21.** Statistical significance of the differences in JARVIS predictive power against 6 other genome-wide scores for structural variant classification using one-sided DeLong's tests for both alternative hypotheses (i.e. "less" or "greater"). The predictive power of each score is assessed via the average AUC score attained with 3-fold cross-validation when classifying each test set of structural variants against a control set of structural variants with intergenic effect. DeLong's test results are visualised as Phred scores (scores > 500 are capped at this value for visualisation purposes). 8 test sets of structural variants have been used based on their predicted effect: **a)** Promoter, **b)** Copy Gain, **c)** Loss-of-Function, **d)** Loss-of-Function duplication, **e)** Inversion span, **f)** Partial duplication, **g)** UTR and **h)** Intronic. The red dashed horizontal line marks the  $p=0.05$  significance threshold [  $y=Phred(0.05)$  ]. Barplots in light purple colour that exceed the significance threshold of  $Phred(0.05)$  support that JARVIS significantly outperforms the respective score (JARVIS > Query\_score). On the other hand, barplots in orange colour that exceed the significance threshold of  $Phred(0.05)$  support that JARVIS significantly underperforms the respective score (JARVIS < Query\_score). Raw p-values from each DeLong test are available at Supplementary Tables 11-18.

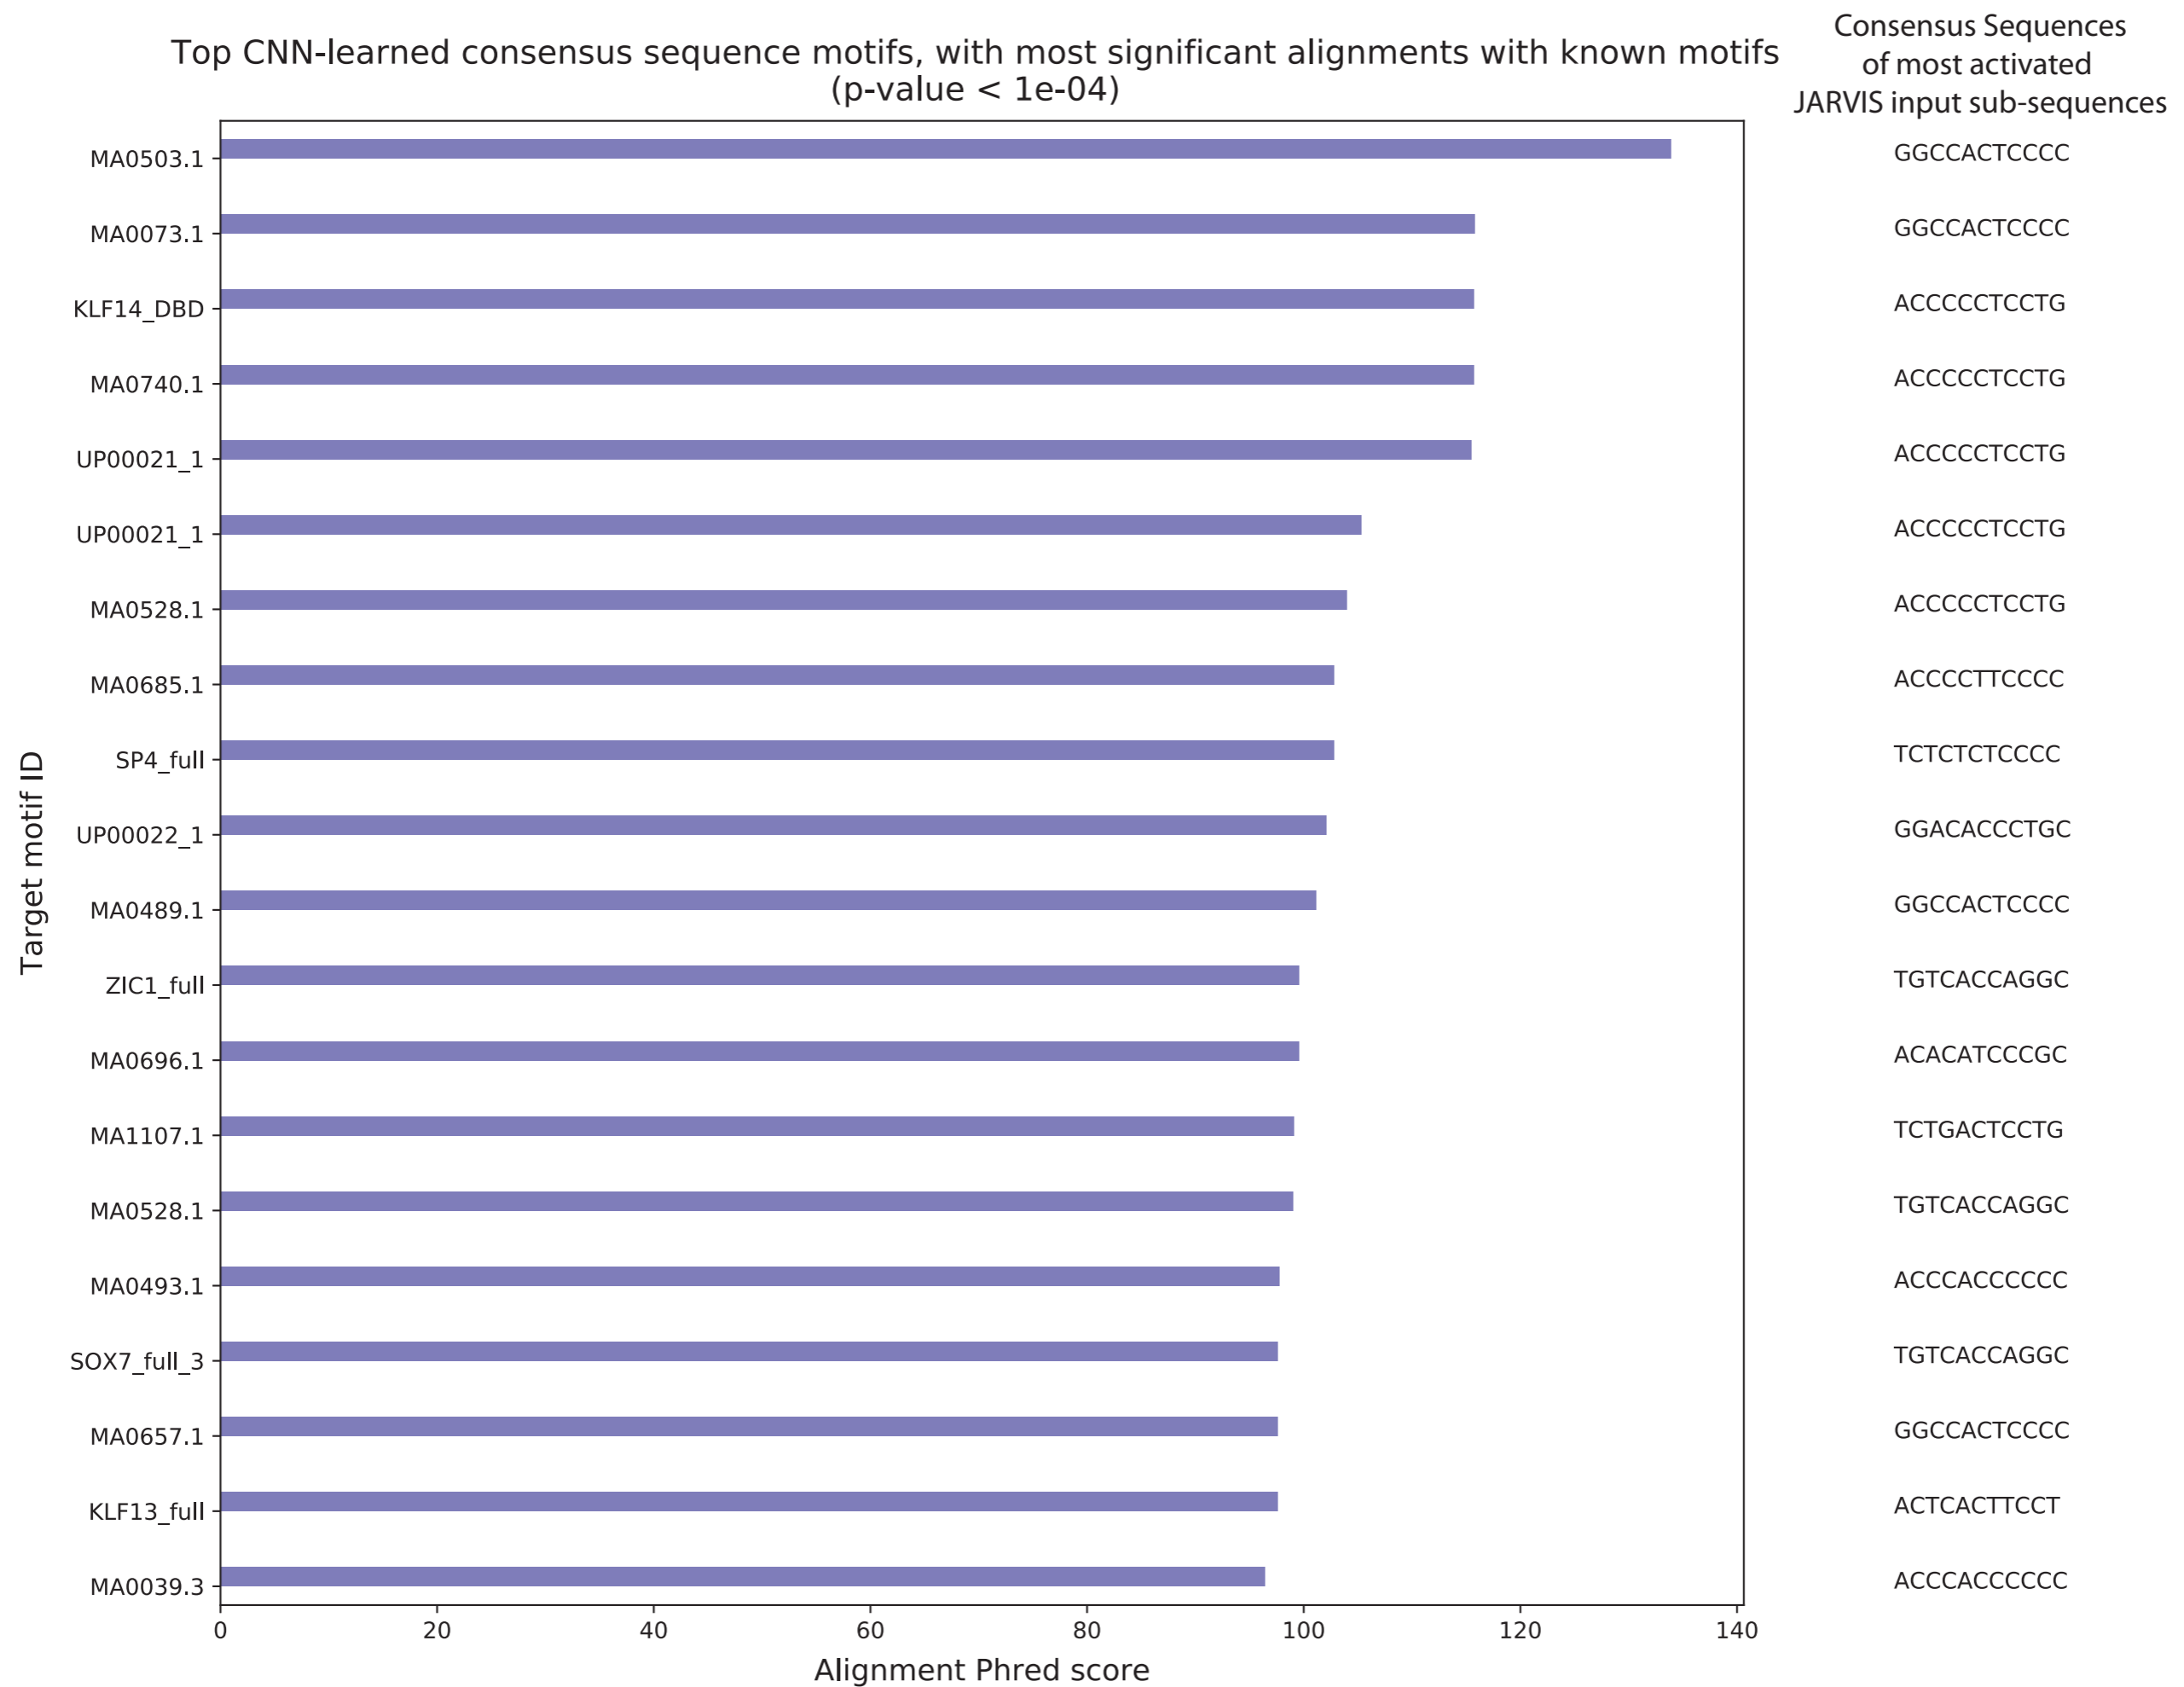

**Supplementary Figure 22.** Consensus sequences of most activated sequence clusters learnt by JARVIS-CNN module that most significantly align with known regulatory motifs.

Most frequent known motifs, mapping to CNN-learned sequence clusters  
(motif occurrence frequency > 5)

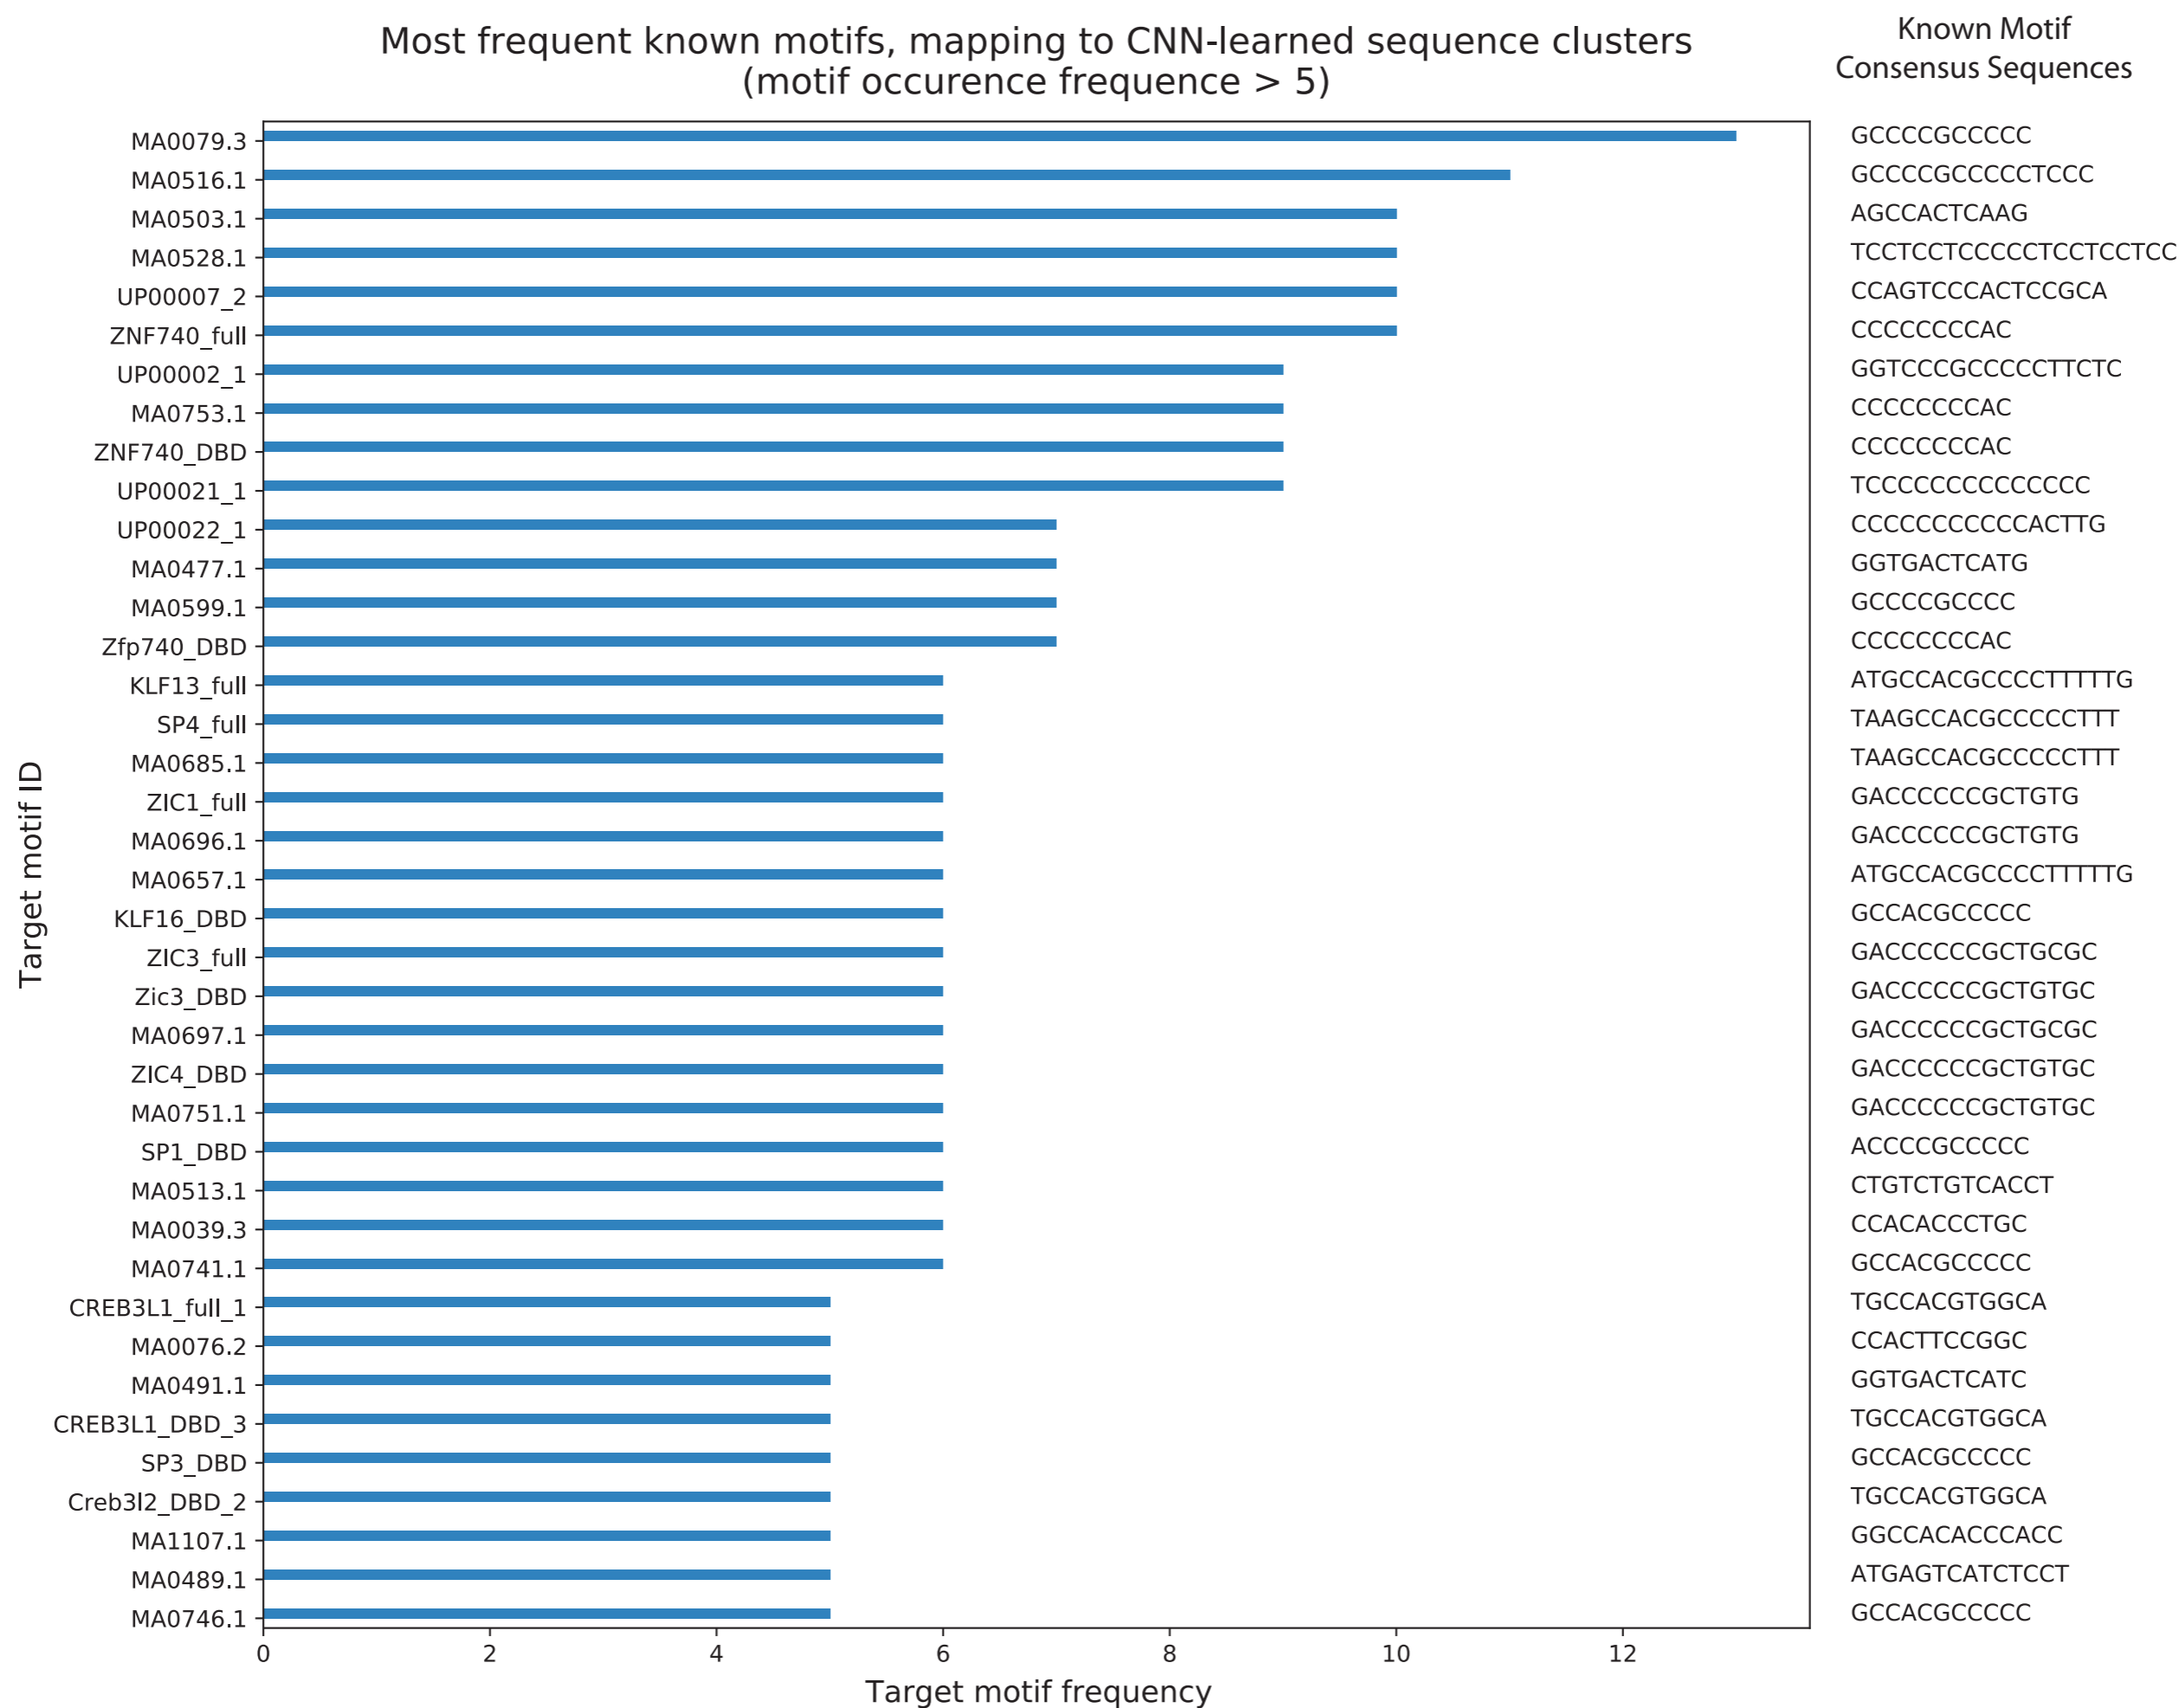

**Supplementary Figure 23.** Consensus sequences of most frequent known motifs extracted with TomTom (MEME Suite), mapping to the top sequence clusters learnt by JARVIS-CNN module.

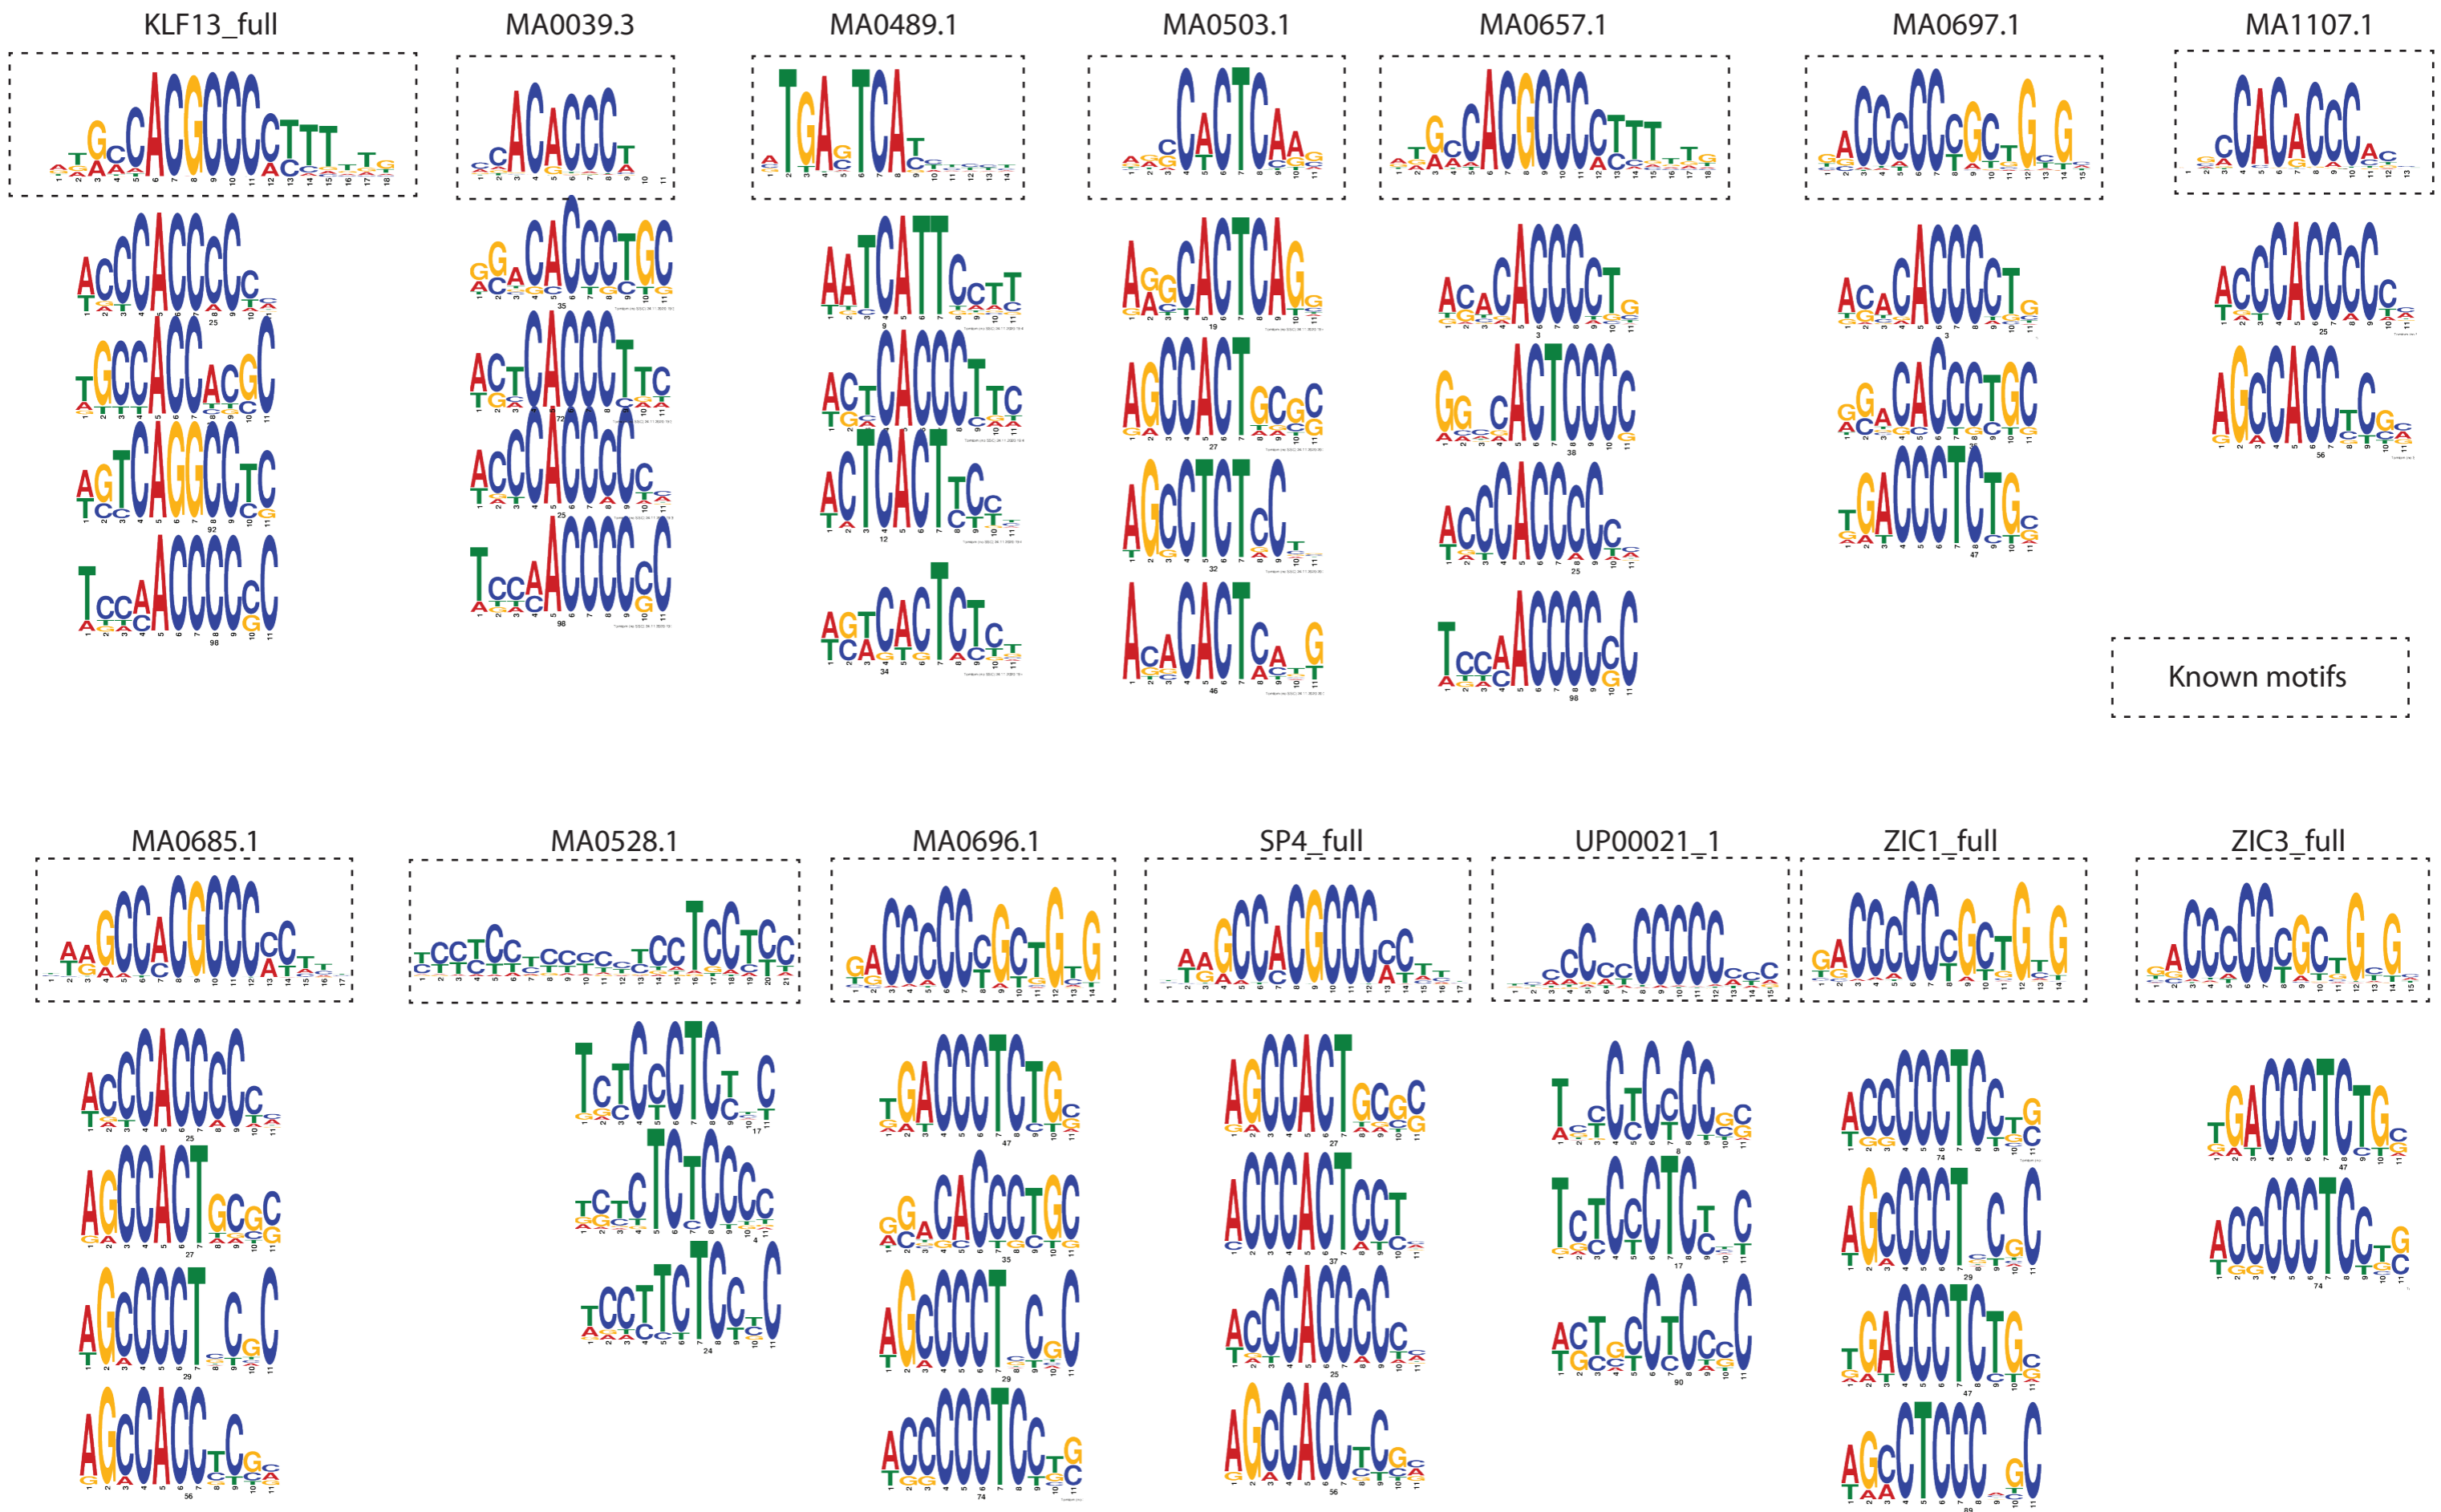

**Supplementary Figure 24.** Sequence logos of sequence clusters learnt by JARVIS-CNN module: intersection of known motifs that have most significantly aligned with JARVIS learnt sequence clusters having the highest activation sum. Known motifs are enclosed in rectangles with dashed lines, while motifs learnt by JARVIS are stacked below the respective known motif achieving the highest degree of alignment.



**Supplementary Table 1.** DeLong test results - gwRVIS cross-validation (lincRNAs). The p-value of the most significant one-sided DeLong test for each pairwise score comparison is shown in bold, as long as  $p < 0.05$ .

| DeLong Test - Alternative hypothesis | Query_score    | pval               | Phred score |
|--------------------------------------|----------------|--------------------|-------------|
| <i>gwRVIS &gt; Query_score</i>       | CADD           | 0.389058791        | 4.099847676 |
| <i>gwRVIS &lt; Query_score</i>       | CADD           | 0.610941209        | 2.140005797 |
| <i>gwRVIS &gt; Query_score</i>       | phyloP46way    | <b>5.83E-03</b>    | 22.34364447 |
| <i>gwRVIS &lt; Query_score</i>       | phyloP46way    | 0.994170443        | 2.54E-02    |
| <i>gwRVIS &gt; Query_score</i>       | phastCons46way | <b>0.001749402</b> | 2.76E+01    |
| <i>gwRVIS &lt; Query_score</i>       | phastCons46way | 9.98E-01           | 0.007604209 |
| <i>gwRVIS &gt; Query_score</i>       | Orion          | <b>1.20E-02</b>    | 19.20305451 |
| <i>gwRVIS &lt; Query_score</i>       | Orion          | 0.987985809        | 0.052492936 |
| <i>gwRVIS &gt; Query_score</i>       | gwRVIS + CADD  | 0.645707235        | 1.899643472 |
| <i>gwRVIS &lt; Query_score</i>       | gwRVIS + CADD  | 0.354292765        | 4.506377166 |

**Supplementary Table 2.** DeLong test results - gwRVIS cross-validation (intergenic regions). The p-value of the most significant one-sided DeLong test for each pairwise score comparison is shown in bold, as long as  $p < 0.05$ .

| DeLong Test - Alternative hypothesis | Query_score    | pval              | Phred score |
|--------------------------------------|----------------|-------------------|-------------|
| <i>gwRVIS &gt; Query_score</i>       | CADD           | 0.343998126       | 4.634439236 |
| <i>gwRVIS &lt; Query_score</i>       | CADD           | 0.656001874       | 1.830949198 |
| <i>gwRVIS &gt; Query_score</i>       | phyloP46way    | <b>2.65E-06</b>   | 55.76556991 |
| <i>gwRVIS &lt; Query_score</i>       | phyloP46way    | 0.999997349       | 1.15E-05    |
| <i>gwRVIS &gt; Query_score</i>       | phastCons46way | <b>0.00619332</b> | 2.21E+01    |
| <i>gwRVIS &lt; Query_score</i>       | phastCons46way | 9.94E-01          | 0.026980883 |
| <i>gwRVIS &gt; Query_score</i>       | Orion          | <b>2.00E-02</b>   | 17.00039088 |
| <i>gwRVIS &lt; Query_score</i>       | Orion          | 0.980049173       | 0.087521337 |
| <i>gwRVIS &gt; Query_score</i>       | gwRVIS + CADD  | 0.594911204       | 2.255478517 |
| <i>gwRVIS &lt; Query_score</i>       | gwRVIS + CADD  | 0.405088796       | 3.924497687 |

**Supplementary Table 3.** DeLong test results - gwRVIS cross-validation (UTRs). The p-value of the most significant one-sided DeLong test for each pairwise score comparison is shown in bold, as long as  $p < 0.05$ .

| DeLong Test - Alternative hypothesis | Query_score    | pval               | Phred score |
|--------------------------------------|----------------|--------------------|-------------|
| <i>gwRVIS &gt; Query_score</i>       | CADD           | 0.997140221        | 0.012437655 |
| <i>gwRVIS &lt; Query_score</i>       | CADD           | <b>0.002859779</b> | 25.43667536 |
| <i>gwRVIS &gt; Query_score</i>       | phyloP46way    | 9.53E-01           | 0.211017908 |
| <i>gwRVIS &lt; Query_score</i>       | phyloP46way    | <b>0.047427128</b> | 1.32E+01    |
| <i>gwRVIS &gt; Query_score</i>       | phastCons46way | <b>0.004104436</b> | 2.39E+01    |
| <i>gwRVIS &lt; Query_score</i>       | phastCons46way | 9.96E-01           | 0.017862023 |
| <i>gwRVIS &gt; Query_score</i>       | Orion          | <b>4.71E-04</b>    | 33.2713895  |

|                                |               |                 |             |
|--------------------------------|---------------|-----------------|-------------|
| <i>gwRVIS &lt; Query_score</i> | Orion         | 0.999529173     | 0.002045256 |
| <i>gwRVIS &gt; Query_score</i> | gwRVIS + CADD | 1               | 1.15E-11    |
| <i>gwRVIS &lt; Query_score</i> | gwRVIS + CADD | <b>2.66E-12</b> | 115.75733   |

**Supplementary Table 4.** DeLong test results - JARVIS training: randomised cross-validation fold splits. The p-value of the most significant one-sided DeLong test for each pairwise score comparison is shown in bold, as long as  $p < 0.05$ .

| DeLong Test - Alternative hypothesis | Query_score    | pval               | Phred score |
|--------------------------------------|----------------|--------------------|-------------|
| <i>JARVIS &gt; Query_score</i>       | DeepSEA        | 0.963057336        | 0.163478561 |
| <i>JARVIS &lt; Query_score</i>       | DeepSEA        | 0.063691255        | 11.95920193 |
| <i>JARVIS &gt; Query_score</i>       | eigenPC        | <b>9.29E-16</b>    | 150.3206768 |
| <i>JARVIS &lt; Query_score</i>       | eigenPC        | 1                  | 4.34E-15    |
| <i>JARVIS &gt; Query_score</i>       | ncER           | 0.999979922        | 8.72E-05    |
| <i>JARVIS &lt; Query_score</i>       | ncER           | <b>2.01E-05</b>    | 46.97273414 |
| <i>JARVIS &gt; Query_score</i>       | CDTS           | <b>4.18E-102</b>   | 1013.784896 |
| <i>JARVIS &lt; Query_score</i>       | CDTS           | 1                  | 0           |
| <i>JARVIS &gt; Query_score</i>       | LINSIGHT       | 0.976308745        | 0.104128206 |
| <i>JARVIS &lt; Query_score</i>       | LINSIGHT       | <b>0.023691255</b> | 16.25411931 |
| <i>JARVIS &gt; Query_score</i>       | gwRVIS         | <b>5.68E-19</b>    | 182.4575293 |
| <i>JARVIS &lt; Query_score</i>       | gwRVIS         | 1                  | 0           |
| <i>JARVIS &gt; Query_score</i>       | CADD           | <b>0.000270548</b> | 35.67755292 |
| <i>JARVIS &lt; Query_score</i>       | CADD           | 0.999729452        | 0.001175135 |
| <i>JARVIS &gt; Query_score</i>       | DANN           | <b>4.00E-29</b>    | 283.9767252 |
| <i>JARVIS &lt; Query_score</i>       | DANN           | 1                  | 0           |
| <i>JARVIS &gt; Query_score</i>       | phyloP46way    | <b>5.80E-18</b>    | 172.3653734 |
| <i>JARVIS &lt; Query_score</i>       | phyloP46way    | 1                  | 0           |
| <i>JARVIS &gt; Query_score</i>       | phastCons46way | <b>5.29E-43</b>    | 422.7643728 |
| <i>JARVIS &lt; Query_score</i>       | phastCons46way | 1                  | 0           |
| <i>JARVIS &gt; Query_score</i>       | Orion          | <b>3.32E-16</b>    | 154.7839623 |
| <i>JARVIS &lt; Query_score</i>       | Orion          | 1                  | 0           |

**Supplementary Table 5.** DeLong test results - JARVIS training: matched variant distances from closest TSS. The p-value of the most significant one-sided DeLong test for each pairwise score comparison is shown in bold, as long as  $p < 0.05$ .

| DeLong Test - Alternative hypothesis | Query_score | pval              | Phred score |
|--------------------------------------|-------------|-------------------|-------------|
| <i>JARVIS &gt; Query_score</i>       | DeepSEA     | <b>0.00281974</b> | 25.49790913 |
| <i>JARVIS &lt; Query_score</i>       | DeepSEA     | 0.99718026        | 0.012263274 |
| <i>JARVIS &gt; Query_score</i>       | ncER        | 1.00E+00          | 0.000214146 |
| <i>JARVIS &lt; Query_score</i>       | ncER        | <b>4.93E-05</b>   | 4.31E+01    |
| <i>JARVIS &gt; Query_score</i>       | CDTS        | <b>2.25E-23</b>   | 2.26E+02    |
| <i>JARVIS &lt; Query_score</i>       | CDTS        | 1.00E+00          | 0           |
| <i>JARVIS &gt; Query_score</i>       | LINSIGHT    | 9.24E-01          | 0.344950539 |

|                      |                |                    |             |
|----------------------|----------------|--------------------|-------------|
| JARVIS < Query_score | LINSIGHT       | 0.087763553        | 10.56685804 |
| JARVIS > Query_score | gwRVIS         | <b>0.007073928</b> | 21.50339379 |
| JARVIS < Query_score | gwRVIS         | 0.992926072        | 0.030830855 |
| JARVIS > Query_score | CADD           | <b>2.14E-02</b>    | 16.70139926 |
| JARVIS < Query_score | CADD           | 0.978627266        | 0.093826882 |
| JARVIS > Query_score | DANN           | <b>9.35E-07</b>    | 60.28969621 |
| JARVIS < Query_score | DANN           | 0.999999065        | 4.06E-06    |
| JARVIS > Query_score | phyloP46way    | <b>3.71E-02</b>    | 14.30338096 |
| JARVIS < Query_score | phyloP46way    | 0.96287539         | 0.164299134 |
| JARVIS > Query_score | phastCons46way | <b>3.37E-12</b>    | 114.7259156 |
| JARVIS < Query_score | phastCons46way | 1                  | 1.46E-11    |
| JARVIS > Query_score | Orion          | <b>3.03E-23</b>    | 225.188548  |
| JARVIS < Query_score | Orion          | 1                  | 0           |

**Supplementary Table 6.** DeLong test results - JARVIS training: cross-validation fold splits stratified by chromosome. The p-value of the most significant one-sided DeLong test for each pairwise score comparison is shown in bold, as long as  $p < 0.05$ .

| DeLong Test - Alternative hypothesis | Query_score    | pval               | Phred score |
|--------------------------------------|----------------|--------------------|-------------|
| JARVIS > Query_score                 | DeepSEA        | 0.06487824         | 11.87900938 |
| JARVIS < Query_score                 | DeepSEA        | 0.98512176         | 0.06510088  |
| JARVIS > Query_score                 | eigenPC        | <b>4.04E-15</b>    | 143.9341466 |
| JARVIS < Query_score                 | eigenPC        | 1.00E+00           | 1.74E-14    |
| JARVIS > Query_score                 | ncER           | 1.00E+00           | 5.05E-08    |
| JARVIS < Query_score                 | ncER           | <b>1.16E-08</b>    | 79.34167227 |
| JARVIS > Query_score                 | CDTS           | <b>4.08E-91</b>    | 903.8926048 |
| JARVIS < Query_score                 | CDTS           | 1                  | 0           |
| JARVIS > Query_score                 | LINSIGHT       | 0.999798139        | 0.000876759 |
| JARVIS < Query_score                 | LINSIGHT       | <b>0.000201861</b> | 36.94947894 |
| JARVIS > Query_score                 | gwRVIS         | <b>3.64E-23</b>    | 224.3839185 |
| JARVIS < Query_score                 | gwRVIS         | 1                  | 0           |
| JARVIS > Query_score                 | CADD           | 1.58E-01           | 8.015685548 |
| JARVIS < Query_score                 | CADD           | 0.842082069        | 7.46E-01    |
| JARVIS > Query_score                 | DANN           | <b>3.20E-16</b>    | 154.9528648 |
| JARVIS < Query_score                 | DANN           | 1                  | 0           |
| JARVIS > Query_score                 | phyloP46way    | <b>9.05E-13</b>    | 120.4344869 |
| JARVIS < Query_score                 | phyloP46way    | 1                  | 3.93E-12    |
| JARVIS > Query_score                 | phastCons46way | <b>6.77E-33</b>    | 321.6942123 |
| JARVIS < Query_score                 | phastCons46way | 1                  | 0           |
| JARVIS > Query_score                 | Orion          | <b>5.50E-11</b>    | 102.5935685 |
| JARVIS < Query_score                 | Orion          | 1                  | 2.39E-10    |

**Supplementary Table 7.** DeLong test results - JARVIS Testing: ncER GWAS dataset (Wells et

al.). The p-value of the most significant one-sided DeLong test for each pairwise score comparison is shown in bold, as long as  $p < 0.05$ .

| DeLong Test - Alternative hypothesis | Query_score    | pval            | Phred score |
|--------------------------------------|----------------|-----------------|-------------|
| JARVIS > Query_score                 | DeepSEA        | <b>5.56E-08</b> | 72.55206268 |
| JARVIS < Query_score                 | DeepSEA        | 0.999999944     | 2.41E-07    |
| JARVIS > Query_score                 | ncER           | <b>7.65E-07</b> | 61.16227987 |
| JARVIS < Query_score                 | ncER           | 0.999999235     | 3.32E-06    |
| JARVIS > Query_score                 | CDTS           | <b>3.39E-39</b> | 3.85E+02    |
| JARVIS < Query_score                 | CDTS           | 1.00E+00        | 0           |
| JARVIS > Query_score                 | LINSIGHT       | <b>1.25E-11</b> | 109.0397495 |
| JARVIS < Query_score                 | LINSIGHT       | 1               | 5.42E-11    |
| JARVIS > Query_score                 | gwRVIS         | <b>6.21E-47</b> | 462.0659146 |
| JARVIS < Query_score                 | gwRVIS         | 1               | 0           |
| JARVIS > Query_score                 | CADD           | <b>3.67E-23</b> | 224.353134  |
| JARVIS < Query_score                 | CADD           | 1               | 0           |
| JARVIS > Query_score                 | DANN           | <b>3.49E-50</b> | 494.5659796 |
| JARVIS < Query_score                 | DANN           | 1               | 0           |
| JARVIS > Query_score                 | phyloP46way    | <b>1.83E-24</b> | 237.3664035 |
| JARVIS < Query_score                 | phyloP46way    | 1               | 0           |
| JARVIS > Query_score                 | phastCons46way | <b>7.43E-42</b> | 411.2928909 |
| JARVIS < Query_score                 | phastCons46way | 1               | 0           |
| JARVIS > Query_score                 | Orion          | <b>2.44E-35</b> | 346.1177985 |
| JARVIS < Query_score                 | Orion          | 1               | 0           |

**Supplementary Table 8.** DeLong test results - JARVIS Testing: ncER Mendelian dataset (Wells et al.). The p-value of the most significant one-sided DeLong test for each pairwise score comparison is shown in bold, as long as  $p < 0.05$ .

| DeLong Test - Alternative hypothesis | Query_score | pval            | Phred score |
|--------------------------------------|-------------|-----------------|-------------|
| JARVIS > Query_score                 | DeepSEA     | <b>3.48E-03</b> | 24.58799486 |
| JARVIS < Query_score                 | DeepSEA     | 0.996523033     | 1.51E-02    |
| JARVIS > Query_score                 | ncER        | 9.19E-01        | 0.367785998 |
| JARVIS < Query_score                 | ncER        | 0.081199125     | 1.09E+01    |
| JARVIS > Query_score                 | CDTS        | <b>2.36E-24</b> | 2.36E+02    |
| JARVIS < Query_score                 | CDTS        | 1.00E+00        | 0           |
| JARVIS > Query_score                 | LINSIGHT    | <b>6.70E-03</b> | 21.7378574  |
| JARVIS < Query_score                 | LINSIGHT    | 0.993297848     | 2.92E-02    |
| JARVIS > Query_score                 | gwRVIS      | <b>3.62E-06</b> | 54.41595365 |
| JARVIS < Query_score                 | gwRVIS      | 0.999996383     | 1.57E-05    |
| JARVIS > Query_score                 | CADD        | <b>5.92E-05</b> | 42.2796431  |
| JARVIS < Query_score                 | CADD        | 0.999940839     | 0.000256941 |
| JARVIS > Query_score                 | DANN        | <b>2.30E-11</b> | 106.3796977 |
| JARVIS < Query_score                 | DANN        | 1               | 1.00E-10    |
| JARVIS > Query_score                 | phyloP46way | <b>9.72E-08</b> | 70.12433983 |

|                      |                |                 |             |
|----------------------|----------------|-----------------|-------------|
| JARVIS < Query_score | phyloP46way    | 0.999999903     | 4.22E-07    |
| JARVIS > Query_score | phastCons46way | <b>1.26E-08</b> | 78.98242191 |
| JARVIS < Query_score | phastCons46way | 0.999999987     | 5.49E-08    |
| JARVIS > Query_score | Orion          | <b>8.07E-04</b> | 30.9302414  |
| JARVIS < Query_score | Orion          | 0.99919281      | 0.003506998 |

**Supplementary Table 9.** DeLong test results - JARVIS Testing: ncER generalisation \_ncRNA\_ dataset (Wells et al.). The p-value of the most significant one-sided DeLong test for each pairwise score comparison is shown in bold, as long as  $p < 0.05$ .

| DeLong Test - Alternative hypothesis | Query_score    | pval            | Phred score |
|--------------------------------------|----------------|-----------------|-------------|
| JARVIS > Query_score                 | DeepSEA        | 5.61E-01        | 2.509373556 |
| JARVIS < Query_score                 | DeepSEA        | 0.43887109      | 3.58E+00    |
| JARVIS > Query_score                 | eigenPC        | <b>5.18E-03</b> | 22.85628246 |
| JARVIS < Query_score                 | eigenPC        | 0.994819499     | 2.26E-02    |
| JARVIS > Query_score                 | ncER           | 6.45E-01        | 1.90E+00    |
| JARVIS < Query_score                 | ncER           | 3.55E-01        | 4.500603917 |
| JARVIS > Query_score                 | CDTS           | <b>2.35E-06</b> | 56.28791839 |
| JARVIS < Query_score                 | CDTS           | 0.999997649     | 1.02E-05    |
| JARVIS > Query_score                 | LINSIGHT       | 6.59E-01        | 1.813676509 |
| JARVIS < Query_score                 | LINSIGHT       | 0.341383891     | 4.667569764 |
| JARVIS > Query_score                 | gwRVIS         | <b>5.39E-06</b> | 52.68414642 |
| JARVIS < Query_score                 | gwRVIS         | 0.99999461      | 2.34E-05    |
| JARVIS > Query_score                 | CADD           | 3.12E-01        | 5.061042101 |
| JARVIS < Query_score                 | CADD           | 0.688185871     | 1.622942479 |
| JARVIS > Query_score                 | DANN           | <b>1.11E-03</b> | 29.53987756 |
| JARVIS < Query_score                 | DANN           | 0.998888237     | 0.004831012 |
| JARVIS > Query_score                 | phyloP46way    | 1.51E-01        | 8.202390762 |
| JARVIS < Query_score                 | phyloP46way    | 0.848727173     | 0.712318933 |
| JARVIS > Query_score                 | phastCons46way | <b>3.88E-03</b> | 24.11516033 |
| JARVIS < Query_score                 | phastCons46way | 0.996123106     | 0.016869861 |

**Supplementary Table 10.** DeLong test results - JARVIS Testing: ncER generalisation \_other\_ dataset (Wells et al.). The p-value of the most significant one-sided DeLong test for each pairwise score comparison is shown in bold, as long as  $p < 0.05$ .

| DeLong Test - Alternative hypothesis | Query_score | pval            | Phred score |
|--------------------------------------|-------------|-----------------|-------------|
| JARVIS > Query_score                 | DeepSEA     | 1.64E-01        | 7.847464935 |
| JARVIS < Query_score                 | DeepSEA     | 0.83584523      | 7.79E-01    |
| JARVIS > Query_score                 | eigenPC     | <b>1.22E-05</b> | 49.15063831 |
| JARVIS < Query_score                 | eigenPC     | 0.99998784      | 5.28E-05    |
| JARVIS > Query_score                 | ncER        | 4.11E-01        | 3.86E+00    |
| JARVIS < Query_score                 | ncER        | 5.89E-01        | 2.302121763 |
| JARVIS > Query_score                 | CDTS        | <b>1.12E-09</b> | 89.51273422 |

|                      |                |                 |             |
|----------------------|----------------|-----------------|-------------|
| JARVIS < Query_score | CDTS           | 0.999999999     | 4.86E-09    |
| JARVIS > Query_score | LINSIGHT       | 6.77E-01        | 1.693903499 |
| JARVIS < Query_score | LINSIGHT       | 0.322967292     | 4.908414574 |
| JARVIS > Query_score | gwRVIS         | <b>1.45E-08</b> | 78.38702157 |
| JARVIS < Query_score | gwRVIS         | 0.999999986     | 6.30E-08    |
| JARVIS > Query_score | CADD           | 3.82E-01        | 4.17892218  |
| JARVIS < Query_score | CADD           | 0.447960928     | 3.487598648 |
| JARVIS > Query_score | DANN           | <b>2.21E-07</b> | 66.55106582 |
| JARVIS < Query_score | DANN           | 0.999999779     | 9.61E-07    |
| JARVIS > Query_score | phyloP46way    | <b>1.10E-03</b> | 29.57657096 |
| JARVIS < Query_score | phyloP46way    | 0.998897591     | 0.004790344 |
| JARVIS > Query_score | phastCons46way | <b>1.66E-03</b> | 27.78669444 |
| JARVIS < Query_score | phastCons46way | 0.998335321     | 0.007235634 |

**Supplementary Table 11.** DeLong test results - JARVIS Testing on Structural Variants (Promoter). The p-value of the most significant one-sided DeLong test for each pairwise score comparison is shown in bold, as long as  $p < 0.05$ .

| DeLong Test - Alternative hypothesis | Query_score | pval             | Phred score |
|--------------------------------------|-------------|------------------|-------------|
| JARVIS > Query_score                 | ncER        | <b>1.36E-32</b>  | 318.6787464 |
| JARVIS < Query_score                 | ncER        | 1                | 0           |
| JARVIS > Query_score                 | LINSIGHT    | <b>1.22E-104</b> | 1039.135936 |
| JARVIS < Query_score                 | LINSIGHT    | 1                | 0.00E+00    |
| JARVIS > Query_score                 | gwRVIS      | <b>6.59E-64</b>  | 6.32E+02    |
| JARVIS < Query_score                 | gwRVIS      | 1.00E+00         | 0           |
| JARVIS > Query_score                 | CADD        | <b>4.76E-49</b>  | 483.2272732 |
| JARVIS < Query_score                 | CADD        | 1                | 0           |
| JARVIS > Query_score                 | eigen       | <b>9.61E-29</b>  | 280.170654  |
| JARVIS < Query_score                 | eigen       | 1                | 0           |
| JARVIS > Query_score                 | Orion       | <b>1.50E-18</b>  | 178.225197  |
| JARVIS < Query_score                 | Orion       | 1                | 0           |

**Supplementary Table 12.** DeLong test results - JARVIS Testing on Structural Variants (Copy Gain). The p-value of the most significant one-sided DeLong test for each pairwise score comparison is shown in bold, as long as  $p < 0.05$ .

| DeLong Test - Alternative hypothesis | Query_score | pval               | Phred score |
|--------------------------------------|-------------|--------------------|-------------|
| JARVIS > Query_score                 | ncER        | <b>3.39E-192</b>   | 1914.696973 |
| JARVIS < Query_score                 | ncER        | 1                  | 0           |
| JARVIS > Query_score                 | LINSIGHT    | <b>8.26E-73</b>    | 720.8277866 |
| JARVIS < Query_score                 | LINSIGHT    | 1                  | 0.00E+00    |
| JARVIS > Query_score                 | gwRVIS      | <b>&lt; 1e-308</b> | 3.08E+03    |
| JARVIS < Query_score                 | gwRVIS      | 1.00E+00           | 0           |

|                      |       |                  |             |
|----------------------|-------|------------------|-------------|
| JARVIS > Query_score | CADD  | <b>8.19E-152</b> | 1510.865332 |
| JARVIS < Query_score | CADD  | 1                | 0           |
| JARVIS > Query_score | eigen | <b>1.59E-28</b>  | 277.9789233 |
| JARVIS < Query_score | eigen | 1                | 0           |
| JARVIS > Query_score | Orion | <b>1.09E-134</b> | 1339.620113 |
| JARVIS < Query_score | Orion | 1                | 0           |

**Supplementary Table 13.** DeLong test results - JARVIS Testing on Structural Variants (Loss-of-Function). The p-value of the most significant one-sided DeLong test for each pairwise score comparison is shown in bold, as long as  $p < 0.05$ .

| DeLong Test - Alternative hypothesis | Query_score | pval               | Phred score |
|--------------------------------------|-------------|--------------------|-------------|
| JARVIS > Query_score                 | ncER        | <b>3.04E-192</b>   | 1915.164141 |
| JARVIS < Query_score                 | ncER        | 1                  | 0           |
| JARVIS > Query_score                 | LINSIGHT    | <b>3.73E-48</b>    | 474.286569  |
| JARVIS < Query_score                 | LINSIGHT    | 1                  | 0.00E+00    |
| JARVIS > Query_score                 | gwRVIS      | <b>&lt; 1e-308</b> | 3.08E+03    |
| JARVIS < Query_score                 | gwRVIS      | 1.00E+00           | 0           |
| JARVIS > Query_score                 | CADD        | <b>7.00E-36</b>    | 351.5508806 |
| JARVIS < Query_score                 | CADD        | 1                  | 0           |
| JARVIS > Query_score                 | eigen       | <b>9.24E-29</b>    | 280.3432965 |
| JARVIS < Query_score                 | eigen       | 1                  | 0           |
| JARVIS > Query_score                 | Orion       | <b>1.73E-137</b>   | 1367.61491  |
| JARVIS < Query_score                 | Orion       | 1                  | 0           |

**Supplementary Table 14.** DeLong test results - JARVIS Testing on Structural Variants (Loss-of-Function Duplication). The p-value of the most significant one-sided DeLong test for each pairwise score comparison is shown in bold, as long as  $p < 0.05$ .

| DeLong Test - Alternative hypothesis | Query_score | pval            | Phred score |
|--------------------------------------|-------------|-----------------|-------------|
| JARVIS > Query_score                 | ncER        | <b>5.23E-50</b> | 492.8158561 |
| JARVIS < Query_score                 | ncER        | 1               | 0           |
| JARVIS > Query_score                 | LINSIGHT    | <b>3.81E-05</b> | 44.18767303 |
| JARVIS < Query_score                 | LINSIGHT    | 0.999961873     | 1.66E-04    |
| JARVIS > Query_score                 | gwRVIS      | <b>1.43E-55</b> | 5.48E+02    |
| JARVIS < Query_score                 | gwRVIS      | 1.00E+00        | 0           |
| JARVIS > Query_score                 | CADD        | <b>2.91E-15</b> | 145.3602313 |
| JARVIS < Query_score                 | CADD        | 1               | 1.30E-14    |
| JARVIS > Query_score                 | eigen       | <b>6.14E-05</b> | 42.12100307 |
| JARVIS < Query_score                 | eigen       | 0.999938638     | 0.0002665   |
| JARVIS > Query_score                 | Orion       | <b>4.99E-32</b> | 313.0178188 |
| JARVIS < Query_score                 | Orion       | 1               | 0           |

**Supplementary Table 15.** DeLong test results - JARVIS Testing on Structural Variants (Inversion span). The p-value of the most significant one-sided DeLong test for each pairwise score comparison is shown in bold, as long as  $p < 0.05$ .

| DeLong Test - Alternative hypothesis | Query_score | pval            | Phred score |
|--------------------------------------|-------------|-----------------|-------------|
| JARVIS > Query_score                 | ncER        | <b>1.91E-49</b> | 487.1830924 |
| JARVIS < Query_score                 | ncER        | 1               | 0           |
| JARVIS > Query_score                 | LINSIGHT    | <b>8.72E-02</b> | 10.59317933 |
| JARVIS < Query_score                 | LINSIGHT    | 0.912766747     | 3.96E-01    |
| JARVIS > Query_score                 | gwRVIS      | <b>4.90E-20</b> | 1.93E+02    |
| JARVIS < Query_score                 | gwRVIS      | 1.00E+00        | 0           |
| JARVIS > Query_score                 | CADD        | <b>9.18E-12</b> | 110.3722289 |
| JARVIS < Query_score                 | CADD        | 1               | 3.99E-11    |
| JARVIS > Query_score                 | eigen       | <b>2.19E-02</b> | 16.60316126 |
| JARVIS < Query_score                 | eigen       | 0.978138303     | 0.095997343 |
| JARVIS > Query_score                 | Orion       | <b>3.86E-08</b> | 74.13388676 |
| JARVIS < Query_score                 | Orion       | 0.999999961     | 1.68E-07    |

**Supplementary Table 16.** DeLong test results - JARVIS Testing on Structural Variants (Partial Duplication). The p-value of the most significant one-sided DeLong test for each pairwise score comparison is shown in bold, as long as  $p < 0.05$ .

| DeLong Test - Alternative hypothesis | Query_score | pval             | Phred score |
|--------------------------------------|-------------|------------------|-------------|
| JARVIS > Query_score                 | ncER        | <b>3.04E-296</b> | 2955.171889 |
| JARVIS < Query_score                 | ncER        | 1                | 0           |
| JARVIS > Query_score                 | LINSIGHT    | <b>4.38E-155</b> | 1543.583129 |
| JARVIS < Query_score                 | LINSIGHT    | 1                | 0.00E+00    |
| JARVIS > Query_score                 | gwRVIS      | <b>2.44E-269</b> | 2.69E+03    |
| JARVIS < Query_score                 | gwRVIS      | 1.00E+00         | 0           |
| JARVIS > Query_score                 | CADD        | <b>3.62E-159</b> | 1584.414764 |
| JARVIS < Query_score                 | CADD        | 1                | 0           |
| JARVIS > Query_score                 | eigen       | <b>2.05E-03</b>  | 26.8875657  |
| JARVIS < Query_score                 | eigen       | 0.997952408      | 0.008901696 |
| JARVIS > Query_score                 | Orion       | <b>6.42E-108</b> | 1071.921546 |
| JARVIS < Query_score                 | Orion       | 1                | 0           |

**Supplementary Table 17.** DeLong test results - JARVIS Testing on Structural Variants (UTR). The p-value of the most significant one-sided DeLong test for each pairwise score comparison is shown in bold, as long as  $p < 0.05$ .

| DeLong Test - Alternative hypothesis | Query_score | pval            | Phred score |
|--------------------------------------|-------------|-----------------|-------------|
| JARVIS > Query_score                 | ncER        | <b>6.12E-07</b> | 62.13408916 |
| JARVIS < Query_score                 | ncER        | 0.999999388     | 2.66E-06    |



|                                |          |                    |             |
|--------------------------------|----------|--------------------|-------------|
| <i>JARVIS &gt; Query_score</i> | LINSIGHT | 1.00E+00           | 1.21E-07    |
| <i>JARVIS &lt; Query_score</i> | LINSIGHT | <b>2.80E-08</b>    | 7.55E+01    |
| <i>JARVIS &gt; Query_score</i> | gwRVIS   | <b>1.78E-11</b>    | 1.08E+02    |
| <i>JARVIS &lt; Query_score</i> | gwRVIS   | 1.00E+00           | 7.71E-11    |
| <i>JARVIS &gt; Query_score</i> | CADD     | 9.78E-01           | 0.097790789 |
| <i>JARVIS &lt; Query_score</i> | CADD     | <b>0.022265542</b> | 16.52366726 |
| <i>JARVIS &gt; Query_score</i> | eigen    | <b>9.55E-17</b>    | 160.200891  |
| <i>JARVIS &lt; Query_score</i> | eigen    | 1                  | 0           |
| <i>JARVIS &gt; Query_score</i> | Orion    | 0.989780274        | 0.04461206  |
| <i>JARVIS &lt; Query_score</i> | Orion    | <b>1.02E-02</b>    | 19.90560727 |

**Supplementary Table 18.** DeLong test results - JARVIS Testing on Structural Variants (Intronic). The p-value of the most significant one-sided DeLong test for each pairwise score comparison is shown in bold, as long as  $p < 0.05$ .

| DeLong Test - Alternative hypothesis | Query_score | pval             | Phred score |
|--------------------------------------|-------------|------------------|-------------|
| <i>JARVIS &gt; Query_score</i>       | ncER        | <b>9.81E-217</b> | 2160.082503 |
| <i>JARVIS &lt; Query_score</i>       | ncER        | 1                | 0           |
| <i>JARVIS &gt; Query_score</i>       | LINSIGHT    | <b>1.70E-94</b>  | 937.6896328 |
| <i>JARVIS &lt; Query_score</i>       | LINSIGHT    | 1                | 0.00E+00    |
| <i>JARVIS &gt; Query_score</i>       | gwRVIS      | 8.90E-01         | 5.05E-01    |
| <i>JARVIS &lt; Query_score</i>       | gwRVIS      | 1.10E-01         | 9.59386659  |
| <i>JARVIS &gt; Query_score</i>       | CADD        | <b>1.44E-02</b>  | 18.42102034 |
| <i>JARVIS &lt; Query_score</i>       | CADD        | 0.985615394      | 0.06292522  |
| <i>JARVIS &gt; Query_score</i>       | eigen       | 3.04E-01         | 5.177135734 |
| <i>JARVIS &lt; Query_score</i>       | eigen       | 0.696410724      | 1.571345499 |
| <i>JARVIS &gt; Query_score</i>       | Orion       | 1.00E+00         | 0           |
| <i>JARVIS &lt; Query_score</i>       | Orion       | <b>9.86E-29</b>  | 280.0598626 |
