# Supplementary material for: Prioritizing non-coding regions based on human genomic constraint and sequence context with deep learning
Source: PubMed Central journal article supplement (PMC7940646; doi:10.1038/s41467-021-21790-4), 2021-03-08
Supplement: 41467_2021_21790_MOESM3_ESM.pdf [file 41467_2021_21790_MOESM3_ESM.pdf]

## **Description of Additional Supplementary Files**

File name: Supplementary Data 1.

Description: Top JARVIS-learnt sequence clusters aligning with known motifs derived with the MEME Suite of tools.
